# Supplementary material for: Barriers and facilitators to recruitment of South Asians to health research: a scoping review
Source: PubMed Central journal article supplement — BMJ Open. 2017 Jun 1;7(5):e014889. doi: 10.1136/bmjopen-2016-014889 (PMC5541387; doi:10.1136/bmjopen-2016-014889), 2017-06-01
Supplement: bmjopen-2016-014889.draft_revisions.pdf [file bmjopen-2016-014889.draft_revisions.pdf]

# BMJ Open

## Barriers and Facilitators to Recruitment of South Asians to Health Research: A Scoping Review

|                                 |                                                                                                                                                                                                                                                                                                                                                                                                                                                                                                                                                                                                                                                       |
|---------------------------------|-------------------------------------------------------------------------------------------------------------------------------------------------------------------------------------------------------------------------------------------------------------------------------------------------------------------------------------------------------------------------------------------------------------------------------------------------------------------------------------------------------------------------------------------------------------------------------------------------------------------------------------------------------|
| Journal:                        | <i>BMJ Open</i>                                                                                                                                                                                                                                                                                                                                                                                                                                                                                                                                                                                                                                       |
| Manuscript ID                   | bmjopen-2016-014889                                                                                                                                                                                                                                                                                                                                                                                                                                                                                                                                                                                                                                   |
| Article Type:                   | Research                                                                                                                                                                                                                                                                                                                                                                                                                                                                                                                                                                                                                                              |
| Date Submitted by the Author:   | 26-Oct-2016                                                                                                                                                                                                                                                                                                                                                                                                                                                                                                                                                                                                                                           |
| Complete List of Authors:       | Quay, Teo; Canadian Agency for Drugs and Technologies in Health; University of British Columbia, Faculty of Land and Food Systems<br>Frimer, Leora; McGill University Faculty of Medicine, Department of Epidemiology, Biostatistics and Occupational Health; University of British Columbia, School of Population and Public Health, Faculty of Medicine<br>Janssen, Patricia; University of British Columbia, School of Population and Public Health, Faculty of Medicine; BC Children's Hospital Research Institute<br>Lamers, Yvonne; University of British Columbia, Faculty of Land and Food Systems; BC Children's Hospital Research Institute |
| <b>Primary Subject Heading</b>: | Global health                                                                                                                                                                                                                                                                                                                                                                                                                                                                                                                                                                                                                                         |
| Secondary Subject Heading:      | Epidemiology                                                                                                                                                                                                                                                                                                                                                                                                                                                                                                                                                                                                                                          |
| Keywords:                       | recruitment, South Asian, minority health, patient selection, scoping review                                                                                                                                                                                                                                                                                                                                                                                                                                                                                                                                                                          |
|                                 |                                                                                                                                                                                                                                                                                                                                                                                                                                                                                                                                                                                                                                                       |

SCHOLARONE™  
Manuscripts

Only

**TITLE PAGE****Title**

Barriers and Facilitators to Recruitment of South Asians to Health Research: A Scoping Review

**Authors**

Teo A W Quay,<sup>1,2</sup> Leora Frimer,<sup>3,4</sup> Patricia A Janssen,<sup>4,5,6</sup> Yvonne Lamers<sup>2,5,6</sup>

**Affiliations**

<sup>1</sup>The Canadian Agency for Drugs and Technologies in Health, Ottawa, ON, Canada

<sup>2</sup>The University of British Columbia, Faculty of Land and Food Systems, Vancouver, BC, Canada

<sup>3</sup>Department of Epidemiology, Biostatistics and Occupational Health, McGill Faculty of Medicine, Montreal, QC, Canada

<sup>4</sup>School of Population and Public Health, Faculty of Medicine, University of British Columbia, Vancouver, BC, Canada

<sup>5</sup>BC Children's Hospital Research Institute, Vancouver, BC, Canada

<sup>6</sup>Women's Health Research Institute, Vancouver, BC, Canada

**Corresponding Author Information**

Yvonne Lamers  
Canada Research Chair in Human Nutrition and Vitamin Metabolism  
Assistant Professor, Food, Nutrition and Health  
Email: [yvonne.lamers@ubc.ca](mailto:yvonne.lamers@ubc.ca)  
Phone: +1 604-827-1776  
Fax: +1 604-822-5143  
FNH 245 - 2205 East Mall  
Vancouver, BC V6T 1Z4  
Canada

**Word Count of Body of Text** 3512

**Number of Tables** 4

**Number of Figures** 1

1  
2  
3 **Number of References 55**  
4

5 **Word Count of Abstract 231**  
6

7 **Keywords and MeSH Headings:** Recruitment, South Asian, Minority Health, Patient  
8

9 Selection, Scoping Review  
10  
11  
12  
13  
14  
15  
16  
17  
18  
19  
20  
21  
22  
23  
24  
25  
26  
27  
28  
29  
30  
31  
32  
33  
34  
35  
36  
37  
38  
39  
40  
41  
42  
43  
44  
45  
46  
47  
48  
49  
50  
51  
52  
53  
54  
55  
56  
57  
58  
59  
60

For peer review only

**ABSTRACT**

**Objectives** People of South Asian ethnicity are under-represented in health research studies. The objectives of this scoping review were to examine the barriers and facilitators to recruitment of South Asians to health research studies, and to describe strategies for improving recruitment.

**Design** Scoping review

**Methods** Using the Arksey and O'Malley framework for scoping reviews, we comprehensively searched electronic databases (MEDLINE via PubMed, Cochrane Library). Studies that identified barriers and facilitators to recruitment, or recruitment strategies for South Asian populations were included. Recruitment barriers, facilitators, and strategies were grouped thematically, and summarized narratively.

**Synthesis** Of 1226 potentially relevant articles, 13 met the inclusion criteria and were included in the thematic synthesis. Multiple facilitators and barriers to enrollment of South Asians in health research studies were identified; these most commonly related to logistical challenges, language and cultural barriers, concerns about adverse consequences of participating, and mistrust of research. Several actionable strategies were discussed, the most common being engagement of South Asian communities, demonstration of cultural competency, provision of incentives and benefits, language sensitivity through the use of translators and translated materials, and the development of trust and personal relationships.

**Conclusion** There is a growing understanding of the barriers and facilitators to recruitment of South Asian participants to health research studies. Understanding of these approaches and implementation during the grant funding stages may reduce the risk of poor recruitment and representation of South Asians.

## ARTICLE SUMMARY

### Strengths and Limitations of this Study

- First scoping review to summarize evidence regarding factors that influence the involvement of South Asian participants in health research
- Comprehensive overview of the volume and characteristics of research published on this topic
- Actionable recruitment strategies and topics for further investigation clearly identified
- Published evidence only available from several countries and primarily in the clinical trial setting so generalizability to other contexts may be limited
- Small sample sizes and variable patient populations indicate that results may not be applicable to the broader South Asian population

## INTRODUCTION

South Asians are the largest ethnic minority in Canada and the United Kingdom (UK).[1,2] South Asian populations have demonstrated historical and projected growth in these regions. The total South Asian population in Canada is currently estimated at 1.6 million individuals (one quarter of the visible minority population, and 4.8% of the total population) and is projected to reach 3.2 to 4.1 million by 2031.[3] In the UK, South Asian ethnic groups, including people identifying as Pakistani and Indian, had some of the largest population increases over the 2001 to 2011 time period.[2]

South Asian populations face specific health challenges. Low socio-economic status,[4] racial and cultural discrimination,[5,6] geography,[7] language barriers,[8] and traditional hierarchies within families[9] have been reported to obstruct optimal health care of South Asians, and in particular South Asian women.[9] Frequently, South Asians maintain traditional religious, dietary, and healthcare practices, which may not align with conventional medicine and clinical research approaches.[10,11] Lack of support from families and communities in seeking healthcare and making healthcare decisions may discourage South Asians from engaging in risk-reducing health behaviors, including participation in research.[12] Lack of English language proficiency, unfamiliarity with local services, and lack of attention to cultural factors by health care providers may pose a particular challenge to healthcare service access for female South Asians.[13]

South Asians are more likely to report poor self-rated health than individuals of alternate ethnicity.[14] A higher proportion of South Asians suffer from health conditions including type 2 diabetes, cardiovascular disease, and asthma than people of European ethnicity,[15–19] and the rates of non-communicable disease are expected to rise.[20] It has been reported that South Asians develop non-communicable diseases at younger ages, despite fewer risk factors (e.g., at lower body mass index), than other ethnic

1  
2  
3 groups.[15,21,22] Mental health is also an emerging area of concern, particularly in  
4  
5 immigrant women who have been demonstrated to have a higher risk of post-partum  
6  
7 depression.[13,23]  
8  
9

10 Adequate ethnic minority representation in health research is important to  
11  
12 support generalizability of research findings and to enable tailored health care for ethnic  
13  
14 minorities.[24,25] However, South Asians are underrepresented in research, which  
15  
16 drives healthcare practice.[26,27] In general, there is a lack of representative population  
17  
18 health research comparing minority groups in Canada to European counterparts.[26]  
19  
20 This under-representation also occurs in other countries; a UK-based analysis reported  
21  
22 that while South Asians make up 4.5% of the total population, they represented on  
23  
24 average only 0.6% of participants in 6 multicenter randomized controlled trials.[2,28]  
25  
26 Another review noted that trials assessing cardiovascular outcomes in type 2 diabetes  
27  
28 patients had underrepresentation of South Asian populations compared to population  
29  
30 proportions in the UK, but overrepresentation in the United States.[29] Even studies with  
31  
32 sufficient numbers of South Asians may not be truly representative of the broad  
33  
34 heterogeneous population.[30]  
35  
36  
37

38 To better understand the current knowledge and perspectives on this topic, a  
39  
40 scoping review of the evidence regarding barriers and facilitators to recruitment, and  
41  
42 strategies that have been employed or evaluated to improve representation of South  
43  
44 Asians was undertaken. A preliminary search of the literature did not yield sufficient  
45  
46 reports on the Canadian population, thus the review was expanded to include literature  
47  
48 regarding South Asian populations residing in other countries.  
49  
50  
51  
52  
53  
54  
55  
56  
57  
58  
59  
60

## METHODS

A scoping review was undertaken according to the methods outlined by Arksey and O'Malley, and Levac et al.[31,32]. This methodology was justified given that there is limited knowledge on this topic, and there was interest in assessing the depth and breadth of the evidence-base. The aim was to identify barriers and facilitators to recruitment of South Asians to health research studies, and associated strategies to improve participation. The following specific research questions were addressed:

1. What are the barriers and facilitators to recruitment of South Asian individuals to health research studies?
2. What are the evidence-based strategies for recruitment of South Asian individuals to health research studies?

## DATA SOURCES AND SEARCH

The search strategy was developed and executed by one reviewer (TQ). A comprehensive search was conducted using PubMed and the Cochrane Library. Medical subject headings and keywords including South Asian, minority groups, patient selection, recruitment, enrolment, recruitment strategies, and specific South Asian ethnicities were searched from January 2004 through April 2016 (Table 1). Search terms are presented in Table 1.

**Table 1. Scoping Review Search Terms**

| <b>A. Ethnicity-Related Search Terms</b> | <b>B. Strategy-Related Search Terms</b> |
|------------------------------------------|-----------------------------------------|
| South Asian or South Asia                | Patient selection [MeSH term]           |
| Minority groups [MeSH term]              | Recruitment                             |
| Minority health [MeSH term]              | Enrolment                               |
| Sri Lankan or Sri Lanka                  | Recruitment strategies                  |
| Bangladeshi or Bangladesh                | OR any of the above                     |
| Pakistani or Pakistan                    |                                         |
| Nepalese or Nepal                        |                                         |
| Bhutanese or Bhutan                      |                                         |
| Maldivian or Maldives                    |                                         |
| Indian or India                          |                                         |
| OR any of the above                      |                                         |
| A AND B                                  |                                         |



1  
2  
3 The full search strategy is available upon request from the authors. The search dates  
4 were restricted in the interest of identifying the most up-to-date evidence on the topic.  
5  
6 The search was supplemented by scanning reference lists of included studies, searching  
7 clinicaltrials.gov and PROSPERO for ongoing work, and by a focused internet search.  
8  
9 Study selection was limited to English language articles or articles that could be  
10 translated using Google Translate. No restriction was made by publication type. Results  
11 from all searched were pooled and de-duplicated prior to screening.  
12  
13

### 14 **Study Selection**

15 All types of studies including primary randomized and non-randomized quantitative and  
16 qualitative studies, and systematic reviews were included. Commentaries and narrative  
17 reviews were excluded. We included studies involving South Asian individuals (e.g., Sri  
18 Lankan, Bangladeshi, Pakistani, Nepalese, Bhutanese, Maldivian, Indian) in any setting,  
19 or studies involving multiple ethnic groups where South Asians were a specified  
20 subgroup or comprised the majority of participants. Studies assessing or reporting on  
21 barriers and facilitators to recruitment, and recruitment strategies were included. This  
22 includes studies determining, assessing the impact or effectiveness, or assessing the  
23 comparative impact or effectiveness of barriers, facilitators, and recruitment strategies.  
24  
25 One reviewer (TQ) independently screened titles and abstracts against the pre-specified  
26 eligibility criteria. A second reviewer (LF) then screened selected abstracts. Full text  
27 articles were obtained and reviewed by both authors for studies that appeared to meet  
28 the eligibility criteria or where eligibility could not be adequately judged. Disagreement  
29 was resolved by discussion. Study authors were not contacted for further information.  
30  
31

### 32 **Data Abstraction**

33 Data abstraction was conducted by two authors (TQ and LF) using a structured and  
34 piloted extraction form. Disagreement was resolved via discussion. Data including a)  
35  
36  
37  
38  
39  
40  
41  
42  
43  
44  
45  
46  
47  
48  
49  
50

1  
2  
3 study classifiers (lead author, publication year, country), b) study characteristics (sample  
4 size, study design, subject characteristics), and c) recruitment barriers, facilitators for  
5 participation, and recruitment strategy data was extracted by a single reviewer. Specific  
6 descriptions of recruitment barriers, facilitators, and strategies were recorded.  
7  
8

9  
10  
11 Barriers and facilitators, and recruitment strategies were grouped thematically into key  
12 topics. Once established, these themes were presented and discussed narratively. No  
13 formal data synthesis or assessment of intervention effectiveness was undertaken.  
14  
15 Quality appraisal of selected studies is outside the scope of this review, but general  
16 limitations are discussed. In addition, no formal consultation exercise with stakeholders  
17 was conducted.  
18  
19

## 20 21 22 23 24 **RESULTS**

### 25 26 27 **Literature Search**

28  
29 The original search identified 1027 potentially relevant publications. After exclusion of  
30 846 publications based on title and abstract, 181 full-texts were screened and 20 articles  
31 selected for duplicate assessment (Figure 1). An updated search (to April 2016)  
32 identified a further 199 potentially relevant articles, from which 3 studies were selected  
33 for full-text review. Of the 23 studies included for full-text review, 13 articles met the  
34 inclusion criteria and were included in this report.  
35  
36  
37  
38  
39  
40  
41

### 42 43 **Study Characteristics**

44 The final thirteen articles included in this review focused on South Asian populations and  
45 discussed barriers and motivations for participation in research, and potential strategies  
46 for recruitment (Table 2).  
47  
48  
49  
50  
51  
52  
53  
54  
55  
56  
57  
58  
59  
60

**Table 2. Study Characteristics.**

| First Author, Year           | Country   | Research Area                | Ethnic Populations                                        | Sample Size                                                                | Study Design                                  |
|------------------------------|-----------|------------------------------|-----------------------------------------------------------|----------------------------------------------------------------------------|-----------------------------------------------|
| Waheed, 2016[33]             | UK        | Mental Health (Depression)   | South Asians                                              | 5 studies (n = 292)                                                        | Mixed-methods study                           |
| Garduno-Diaz, 2014 [34]      | UK        | Diet and Nutrition           | South Asians                                              | n = 300 adults, n = 100 children                                           | Literature review and dietary survey          |
| Mac Neill, 2013 [27]         | UK        | Asthma, Clinical Trials      | Multiple ethnic groups (primarily Bangladeshi)            | n = 42 parents (n = 20 Bangladeshi, n = 22 other)                          | Qualitative Interviews                        |
| Douglas, 2011 [35]           | UK        | Diabetes                     | South Asians                                              | n = 1319 potential recruits                                                | Descriptive review of recruitment experiences |
| Rooney, 2011 [36]            | UK        | Asthma                       | South Asians                                              | n = 58 people with asthma                                                  | Qualitative focus groups                      |
| Samsudeen, 2011 [37]         | UK        | Diabetes - Obesity           | South Asians                                              | n = 22 health professionals, n = 27 community workers                      | Quantitative survey                           |
| Stirland, 2011 [38]          | US/UK     | Asthma                       | South Asians                                              | n = 36 researchers                                                         | Qualitative interviews                        |
| Sheikh, 2009 [18]            | UK/UK     | Asthma                       | South Asians                                              | n = 36 researchers (19 UK, 17 US), n = 10 community members)               | Qualitative interviews                        |
| Lloyd, 2008 [39]             | UK        | Diabetes                     | South Asians (Sylheti and Mipuri peoples from Bangladesh) | n = 31 participants                                                        | Qualitative interviews                        |
| Mohammadi, 2008 [40]         | Australia | Hospitalized Patients        | Islamic South Asians                                      | n = 13 participants enrolled                                               | Interpretive hermeneutic study                |
| Krupp, 2007 [41]             | India     | Reproductive Health Research | South Asian women                                         | n = 918 enrolled participants                                              | Prospective cohort study                      |
| Hussain-Gambles, 2006 [30]   | UK        | Clinical Trials              | South Asian health professional and lay persons           | 25 health professionals, n = 60 lay persons                                | Qualitative interviews                        |
| Hussain-Gambles*, 2004* [25] | UK        | Clinical Trials              | South Asians                                              | n = 25 health professionals, n = 60 lay persons, n = 15 trial participants | Literature review and qualitative interviews  |

\*Some common data between publications  
UK = United Kingdom, US = United States

1  
2  
3 Study populations ranged in size from n=13 to n=1319. The majority of studies were  
4  
5 conducted in specific clinical populations. This included patients with depression,[33]  
6  
7 nutritional concerns,[34] asthma,[18,27,36,38] diabetes,[35,37,39] obesity,[37] in  
8  
9 hospital,[40] with reproductive health concerns,[41] and who were being recruited for  
10  
11 clinical trials.[25,30] Study designs included prospective cohort studies,[41] qualitative  
12  
13 interviews and focus groups,[18,25,27,30,36,38,39] literature reviews,[30,34] quantitative  
14  
15 surveys,[34,37] retrospective descriptive accounts of recruitment experiences,[35]  
16  
17 hermeneutic studies,[40] and mixed-methods syntheses.[33]  
18  
19

20  
21 Most of the studies employed qualitative or survey-based techniques. As such,  
22  
23 most outcome data is sourced from direct interview statements and personal experience.  
24  
25 Limited empirical evidence on the effectiveness of the various recruitment strategies  
26  
27 discussed was available. Most of the included studies were conducted in the UK and  
28  
29 dealt with recruitment of clinical populations to clinical trials.  
30  
31

### 32 **Facilitators**

33  
34 Three studies conducted in the UK [25,27,37] reported on facilitators of participation in  
35  
36 research. Subjects perceived participation in research to be a possible route to improved  
37  
38 treatment and health [25,27]. Participants also reported being motivated by the  
39  
40 importance of disease prevention and potential to contribute to scientific knowledge  
41  
42 [25,37], by the potential to help society through participation [25], and by a sense of  
43  
44 obligation to healthcare providers [25]. It was reported that higher social class and  
45  
46 education, and younger age influence the level of awareness of clinical trials in South  
47  
48 Asians.  
49

### 50 **Barriers**

51  
52 Potential barriers to recruitment of South Asians are outlined in Table 3.  
53  
54  
55  
56  
57  
58  
59  
60

**Table 3. Barriers to Recruitment of South Asian Populations**

| Recruitment Barrier                                                              | First Author, Year of Publication |                      |                    |                   |                      |                   |                  |                           |                           |
|----------------------------------------------------------------------------------|-----------------------------------|----------------------|--------------------|-------------------|----------------------|-------------------|------------------|---------------------------|---------------------------|
|                                                                                  | Waheed, 2016 [33]                 | Mac Neill, 2013 [27] | Douglas, 2011 [35] | Rooney, 2011 [36] | Samsudeen, 2011 [37] | Sheikh, 2009 [18] | Lloyd, 2008 [39] | Hussain-Gambles, 2004[25] | Hussain-Gambles, 2006[30] |
| <b>Participant-related</b>                                                       |                                   |                      |                    |                   |                      |                   |                  |                           |                           |
| Concerns about adverse effects*                                                  |                                   | X                    |                    | X                 | X                    |                   |                  | X                         |                           |
| Time spent away from work, travel time, family and other commitments             | X                                 |                      | X                  | X                 | X                    | X                 |                  | X                         | X                         |
| Potential costs associated with participating                                    | X                                 |                      | X                  |                   |                      |                   |                  |                           |                           |
| Stigma of being labeled with a health condition                                  | X                                 |                      |                    | X                 |                      |                   |                  |                           |                           |
| Prior treatment for disease (trial participation perceived as unnecessary)       | X                                 |                      |                    |                   | X                    |                   |                  |                           |                           |
| Utilization of disease-specific services (e.g., mental health services)          | X                                 |                      |                    |                   |                      |                   |                  |                           |                           |
| Lack of interest, misgivings about scientific importance                         |                                   |                      |                    |                   |                      | X                 | X                |                           |                           |
| Fear of finding out health status                                                |                                   |                      |                    |                   |                      | X                 |                  |                           |                           |
| Mistrust of research                                                             | X                                 |                      |                    |                   | X                    |                   |                  | X                         |                           |
| Poor understanding of research intentions among community or religious leaders   |                                   |                      |                    |                   |                      |                   | X                |                           |                           |
| Previous poor experiences participating in research                              |                                   |                      |                    |                   |                      |                   |                  | X                         |                           |
| Immigrant perceptions of not belonging to society meant to benefit from research |                                   |                      |                    |                   |                      |                   |                  | X                         | X                         |
| Religious or cultural conflicts                                                  | X                                 |                      |                    |                   |                      |                   |                  |                           | X                         |
| Lack of being approached                                                         |                                   |                      |                    |                   |                      |                   |                  | X                         |                           |
| Decisional hierarchies and gender                                                | X                                 |                      |                    |                   |                      |                   |                  | X                         |                           |
| Fear of being reported to immigration                                            | X                                 |                      |                    |                   |                      |                   |                  |                           |                           |
| Substance abuse or mental health issues                                          | X                                 |                      |                    |                   |                      |                   |                  |                           |                           |
| Logistical issues related to transportation or location                          | X                                 |                      |                    |                   |                      |                   |                  |                           |                           |
| Lack of understanding about consent process                                      | X                                 |                      |                    |                   |                      |                   |                  |                           |                           |
| <b>Researcher or research-related</b>                                            |                                   |                      |                    |                   |                      |                   |                  |                           |                           |
| Stereotypes about difficulties of engaging with South Asian populations          | X                                 |                      |                    |                   |                      |                   |                  |                           | X                         |
| Researchers attitudes (e.g. antipathy)                                           | X                                 |                      |                    |                   |                      |                   | X                |                           |                           |

1  
2  
3  
4  
5  
6  
7  
8  
9  
10  
11  
12  
13  
14  
15  
16  
17  
18  
19  
20  
21  
22  
23  
24  
25  
26  
27  
28  
29  
30  
31  
32  
33  
34  
35  
36  
37  
38  
39  
40  
41  
42  
43  
44  
45  
46  
47  
48  
49

---

|                                                                                                                                                                         |   |  |   |   |   |
|-------------------------------------------------------------------------------------------------------------------------------------------------------------------------|---|--|---|---|---|
| Narrow entry criteria                                                                                                                                                   |   |  |   | X |   |
| Limited time to recruit                                                                                                                                                 | X |  |   | X |   |
| Language (lack of study materials and communication in South Asian languages) or cultural issues<br>(e.g., lack of respect for gender segregation, religious practices) | X |  | X | X | X |
| Costs associated with elevated recruitment requirements                                                                                                                 | X |  |   | X |   |
| Lack of appropriate assessment tools                                                                                                                                    | X |  |   |   |   |
| Underrepresentation of ethnic population at recruitment sites                                                                                                           | X |  |   |   |   |

---

\*Related to interventions in clinical trials

For peer review only

1  
2  
3 Treatment or participation related factors included perception of risk of adverse effects,  
4  
5 fear of finding out health status or experiencing the stigma of being labeled with a health  
6  
7 condition, previous poor experiences, mistrust of research, inability to participate due to  
8  
9 substance abuse or mental health issues, and fear of being reported to immigration.  
10  
11 Logistical concerns focused on cost of participating, time away from work, family and  
12  
13 other commitments, transportation and location, underrepresentation of South Asians at  
14  
15 recruitment sites, and lack of access to disease-specific services. Language- or culture-  
16  
17 specific barriers included religious or cultural conflicts, decisional hierarchies within  
18  
19 families, lack of understanding about the consent process, researcher stereotypes about  
20  
21 difficulties engaging with the South Asian population, inability to provide staff with  
22  
23 language and cultural competency training, inability to translate study materials, and  
24  
25 traditional gender roles. Some barriers related to general disinterest or lack of  
26  
27 awareness, including lack of interest due to previous treatment and the perception that  
28  
29 participation would not confer any further benefit, misgivings about the scientific  
30  
31 importance of the work, poor understanding of research intentions, perception of not  
32  
33 belonging to the society standing to benefit from research, simply not being approached  
34  
35 to participate, and researcher antipathy towards achieving proper representation of  
36  
37 South Asians. Finally, some study-specific issues included a lack of appropriate  
38  
39 assessment tools (e.g., translated or adapted tools) for South Asian populations, as well  
40  
41 as narrow entry criteria.  
42  
43  
44  
45

### 46 **Recruitment Strategies**

47  
48 The most commonly reported strategy was involvement of the South Asian community  
49  
50 through mobilization of key community figures or community partnerships.[18,25,33–  
51  
52 35,37,41] The second most commonly reported strategies were incentives and  
53  
54 reciprocal benefits,[18,33,34,36,38] and demonstrated respect and knowledge of South  
55  
56  
57  
58  
59  
60

1  
2  
3 Asian culture, traditions, and ethics.[33,34,36,38,40] Multiple studies also mentioned the  
4  
5 development of trust and personal relationships,[33,36–38] the use of visual aids and  
6  
7 reduced reliance on verbal exchange,[27,34,39] providing language support and  
8  
9 translated materials,[33,34,37,38] personal versus written contact,[36,37,39] training for  
10  
11 staff in cultural competency,[18,25,33] conducting recruitment at places with high  
12  
13 concentrations of South Asian attendance or residence,[25,33,34] and improving  
14  
15 flexibility of appointment scheduling, location, childcare and transportation.[33,36,38]  
16  
17 Several additional strategies for recruiting South Asian populations reported by two or  
18  
19 fewer studies, as well as those previously discussed as outlined in Table 4.  
20  
21  
22  
23  
24  
25  
26  
27  
28  
29  
30  
31  
32  
33  
34  
35  
36  
37  
38  
39  
40  
41  
42  
43  
44  
45  
46  
47  
48  
49  
50  
51  
52  
53  
54  
55  
56  
57  
58  
59  
60



**Table 4. Recruitment Strategies for South Asian Populations**

| Recruitment Strategy                                                                                                                                                                | First Author, Year |                         |                      |                    |                   |                      |                     |                   |                  |                      |                            |                  |
|-------------------------------------------------------------------------------------------------------------------------------------------------------------------------------------|--------------------|-------------------------|----------------------|--------------------|-------------------|----------------------|---------------------|-------------------|------------------|----------------------|----------------------------|------------------|
|                                                                                                                                                                                     | Waheed, 2016[33]   | Garduno-Diaz, 2014 [34] | Mac Neill, 2013 [27] | Douglas, 2011 [35] | Rooney, 2011 [36] | Samsudeen, 2011 [37] | Stirland, 2011 [38] | Sheikh, 2009 [18] | Lloyd, 2008 [39] | Mohammadi, 2008 [40] | Hussain-Gambles, 2004 [25] | Krupp, 2007 [41] |
| Involvement of community members, sustainable community partnerships                                                                                                                | X                  | X                       |                      | X                  |                   | X                    |                     | X                 |                  |                      | X                          | X                |
| Involving family members in recruitment process                                                                                                                                     | X                  |                         |                      |                    |                   |                      |                     |                   |                  |                      |                            |                  |
| Translated informed consent and option for verbal consent                                                                                                                           | X                  |                         |                      |                    |                   |                      |                     |                   |                  |                      |                            |                  |
| Incentives (financial or otherwise), reciprocal benefits                                                                                                                            | X                  | X                       |                      |                    | X                 |                      | X                   | X                 |                  |                      |                            |                  |
| Demonstrated respect and knowledge of culture and traditions, ethics, training of staff in cultural awareness                                                                       | X                  | X                       |                      |                    | X                 |                      | X                   |                   |                  | X                    |                            |                  |
| Development of trust and personal relationships                                                                                                                                     | X                  |                         |                      |                    | X                 | X                    | X                   |                   |                  |                      |                            |                  |
| Visual aids and reduced reliance on verbal exchange                                                                                                                                 |                    | X                       | X                    |                    |                   |                      |                     |                   | X                |                      |                            |                  |
| Language knowledge or translators; employing staff with language and cultural similarities to participants; translated materials and interpreters                                   | X                  | X                       |                      |                    |                   | X                    | X                   |                   |                  |                      |                            |                  |
| Personalized versus written contact                                                                                                                                                 |                    |                         |                      |                    | X                 | X                    |                     |                   | X                |                      |                            |                  |
| Employment of multiple strategies                                                                                                                                                   |                    |                         |                      |                    |                   |                      |                     |                   |                  | X                    | X                          |                  |
| Support structure for education and training of staff in minority specific issues                                                                                                   | X                  |                         |                      |                    |                   |                      |                     | X                 |                  |                      | X                          |                  |
| Constant communication and follow up, effective dissemination                                                                                                                       |                    | X                       |                      |                    |                   |                      | X                   |                   |                  |                      |                            |                  |
| Snowball sampling                                                                                                                                                                   |                    | X                       |                      |                    |                   |                      |                     |                   |                  | X                    |                            |                  |
| Recruitment at places of worship and community centers, health practices with high percentage of minorities, ethnically dense areas, through ethnic specific modes of communication | X                  | X                       |                      |                    |                   |                      |                     |                   |                  |                      | X                          |                  |
| Flexibility (location, timing of appointments, childcare, transportation)                                                                                                           | X                  |                         |                      |                    | X                 |                      | X                   |                   |                  |                      |                            |                  |

1  
2  
3  
4  
5  
6  
7  
8  
9  
10  
11  
12  
13  
14  
15  
16  
17  
18  
19  
20  
21  
22  
23  
24  
25  
26  
27  
28  
29  
30  
31  
32  
33  
34  
35  
36  
37  
38  
39  
40  
41  
42  
43  
44  
45  
46  
47  
48  
49

---

|                                                                                               |   |   |   |   |  |   |   |   |
|-----------------------------------------------------------------------------------------------|---|---|---|---|--|---|---|---|
| Demonstration of religious and cultural knowledge and sensitivity                             | X |   |   |   |  |   |   |   |
| Culture specific research tools                                                               | X | X |   |   |  |   |   |   |
| Face-to-face conduct of data collection                                                       |   |   | X |   |  |   |   |   |
| Direct physician recruitment, interaction with senior investigators                           | X |   |   | X |  |   |   |   |
| Funding to support logistic considerations related to involvement of South Asians in research | X |   |   |   |  | X |   |   |
| Government supported mandates to include South Asians in research                             |   |   |   |   |  |   | X |   |
| Focus groups to identify recruitment barriers                                                 |   |   |   |   |  |   |   | X |
| Widening eligibility criteria                                                                 |   |   |   |   |  |   |   | X |
| Offering of educational opportunities to attract South Asian health professionals             |   |   |   |   |  |   |   | X |
| Engagement of South Asian media                                                               | X |   |   |   |  |   |   |   |
| Employing patients and public or seeking input into study design and conduct                  | X |   |   |   |  |   |   |   |
| Academic-community partnerships                                                               | X |   |   |   |  |   |   |   |
| Providing counseling or education on participants clinical condition                          | X |   |   |   |  |   |   |   |
| Assurance of confidentiality                                                                  | X |   |   |   |  |   |   |   |
| Catering to gender-specific needs                                                             | X |   |   |   |  |   |   |   |
| Provision of culturally appropriate incentives and hospitality                                | X |   |   |   |  |   |   |   |
| Produce validated translated or culture-specific assessment tools                             | X |   |   |   |  |   |   |   |

---

## DISCUSSION

To our knowledge, this is the first summary of evidence regarding factors that influence the participation of South Asians in health research studies. The studies summarized in this review identified multiple strategies to improve the success of recruitment strategies among South Asian populations. This information may help researchers to develop evidence-based strategies to improve representation of this minority in health research.

Factors that facilitated South Asian participation in research included wanting to improve one's health and engage in disease prevention, to contribute to scientific knowledge and greater societal advances, and a sense of obligation to health care providers. Interest in health and research may vary according to social class and education. As a result, strategies that aim to capitalize on altruism and awareness may systematically exclude South Asians of lower socioeconomic status. Strategies such as using assessment tools with less emphasis on literacy, reducing participation costs and inconvenience, and snowball sampling within broad South Asian communities could potentially mitigate this to some extent. Obligation to healthcare providers may be more common in South Asians than other ethnic groups. A literature review on South Asian perspectives on clinical and research ethics reported that medical paternalism persists in South Asian society.[42] Recruitment involving senior physicians or researchers through partnerships between hospitals and academic centers is preferred to recruitment by individuals with perceived lesser hierarchical status by South Asians living in the UK [43]. While this dynamic may be beneficial for increasing numbers where physician recruitment is feasible, potential abuse of this power dynamic may be detrimental. It may be necessary to have systems in place to limit exploitation of this relationship in the interest of reducing selection and performance bias. For instance, junior research staff

1  
2  
3 could be involved in participant engagement until the stage that it is necessary for  
4  
5  
6 physicians to participate in the research process.

7  
8 Many of the barriers to participation in research relate to cultural insensitivity,  
9  
10 lack of awareness of research or contact by researchers, and tangible issues like time  
11  
12 and cost of participating. Language was also a frequently cited issue. Language  
13  
14 compatibility has been reported to be of great importance to South Asian patients.[44]  
15  
16 Jolly *et al.* [8] observed a significantly higher proportion of South Asian individuals being  
17  
18 excluded from participation in research due to language barriers compared to 'White  
19  
20 Europeans' or those of 'Other' ethnicities. The use of multilingual research assistants, or  
21  
22 principal investigators from the same ethnic background, or with language and cultural  
23  
24 competency training has been proposed as a possible strategy to overcome language  
25  
26 barriers. This approach may also allow for larger recruitment pools if these staff are part  
27  
28 of or able to access networks within the South Asian community.[45] The effectiveness  
29  
30 of this strategy has been demonstrated in the successful recruitment and long-term  
31  
32 retention of pregnant South Asian women for a study involving sample collection from  
33  
34 the mother and baby in the UK.[46]  
35  
36

37  
38 Other common barriers related to negative and discordant perceptions between  
39  
40 researchers and South Asian participants. Various stereotypes held by health  
41  
42 professionals conducting research on South Asian populations were highlighted as  
43  
44 recruitment deterrents. Specific examples include perceptions that South Asians are not  
45  
46 punctual, that they will have language limitations, generalizations that certain  
47  
48 subpopulations (e.g., seniors) would not have an interest in participating, perceived  
49  
50 issues with gender hierarchies (e.g., inability of women to make independent decisions),  
51  
52 the misconception that South Asians are not interested in disease prevention, and the  
53  
54 association of English speaking with intelligence and potentially greater trial  
55  
56  
57  
58  
59  
60

1  
2  
3 compatibility. On the other hand, South Asians reported that mistrust, mistreatment and  
4  
5 disrespectful behavior, sub-par care for non-English speakers, and previous poor  
6  
7 experiences participating in research would deter willingness to participate.[30] Cross-  
8  
9 cultural education of individuals working in research to dispel incorrect racial and cultural  
10  
11 stereotypes, as well as education of South Asian communities to dispel some  
12  
13 misconceptions about health research should be encouraged.[47]  
14

15  
16 From a logistical perspective, studies focused on South Asians may require  
17  
18 upfront budgeting for enhanced recruitment strategies to address the unique barriers  
19  
20 discussed. In particular, funds for multiple research sites, transportation of patients,  
21  
22 incentives, and childcare may need to be accounted for at the grant funding stages.  
23  
24 Support for minority recruitment may be better in the US where the National Institutes of  
25  
26 Health Revitalization Act of 1993 promotes opportunities for women and minorities to  
27  
28 participate in health research.[48,49] There is mandated support for gender  
29  
30 representation, but not for minority representation in Canada.[50] Government or  
31  
32 institutional regulations promoting minority representation may encourage researchers to  
33  
34 confront various barriers, despite the challenges involved.  
35  
36

37  
38 There were some similarities and differences in the findings of this scoping  
39  
40 review compared to what has been reported for other ethnic groups. Congruent with our  
41  
42 findings, a systematic review of recruitment barriers and facilitators in African Americans,  
43  
44 Latinos, Asian Americans, and Pacific Islanders in the US reported that issues of  
45  
46 mistrust, competing demands, unintended outcomes, lack of access to research  
47  
48 information, stigma, health insurance coverage, and jeopardizing legal status in the US  
49  
50 were barriers to participation in research.[24] Facilitators included cultural congruence,  
51  
52 benefits to participation, altruism, convenience of participation, and low risks associated  
53  
54 with participation. They also found that there were issues specific to ethnic groups. For  
55  
56  
57  
58  
59  
60

1  
2  
3 instance, African Americans were disturbed by the legacy of the Tuskegee syphilis  
4 study, and Asian Americans often required the endorsement from family members.  
5  
6 Another systematic review[51] that assessed barriers and facilitators in indigenous  
7 populations in several countries including the US, Canada, Australia, and New Zealand,  
8 reported that relationships and partnership, indigenous staff, indigenous knowledge  
9 models, targeted recruitment, and adaptation of study material were associated with  
10 improved recruitment, whereas factors such as distrust of research attributable to the  
11 participants, study-centric issues such as trial design (no phone, travel costs), and lack  
12 of incorporation of indigenous knowledge systems dissuaded individuals from  
13 participating. While some barriers such as logistical issues may be common to multiple  
14 ethnic groups, the strategies to address cultural factors may differ depending on  
15 ethnicity. This highlights the importance of establishing targeted recruitment strategies  
16 specific not only to an individual ethnic group, but also that address heterogeneity within  
17 an ethnic group.  
18  
19  
20  
21  
22  
23  
24  
25  
26  
27  
28  
29  
30  
31  
32

33  
34 A strength of this review is that a range of perspectives and ideas regarding  
35 recruitment of South Asians have been summarized and grouped thematically.  
36 Accordingly, this review represents a comprehensive in-depth overview of this subject  
37 area, and provides a good estimate of the volume and characteristics of the published  
38 literature. Further, this review highlights areas for future investigation such as evaluation  
39 of the effectiveness of the proposed recruitment strategies in the Canadian setting.  
40  
41  
42  
43  
44  
45  
46 There were several limitations to this review and the individual studies included.  
47  
48  
49  
50  
51  
52  
53  
54  
55  
56  
57  
58  
59  
60  
61  
62  
63  
64  
65  
66  
67  
68  
69  
70  
71  
72  
73  
74  
75  
76  
77  
78  
79  
80  
81  
82  
83  
84  
85  
86  
87  
88  
89  
90  
91  
92  
93  
94  
95  
96  
97  
98  
99  
100  
101  
102  
103  
104  
105  
106  
107  
108  
109  
110  
111  
112  
113  
114  
115  
116  
117  
118  
119  
120  
121  
122  
123  
124  
125  
126  
127  
128  
129  
130  
131  
132  
133  
134  
135  
136  
137  
138  
139  
140  
141  
142  
143  
144  
145  
146  
147  
148  
149  
150  
151  
152  
153  
154  
155  
156  
157  
158  
159  
160  
161  
162  
163  
164  
165  
166  
167  
168  
169  
170  
171  
172  
173  
174  
175  
176  
177  
178  
179  
180  
181  
182  
183  
184  
185  
186  
187  
188  
189  
190  
191  
192  
193  
194  
195  
196  
197  
198  
199  
200  
201  
202  
203  
204  
205  
206  
207  
208  
209  
210  
211  
212  
213  
214  
215  
216  
217  
218  
219  
220  
221  
222  
223  
224  
225  
226  
227  
228  
229  
230  
231  
232  
233  
234  
235  
236  
237  
238  
239  
240  
241  
242  
243  
244  
245  
246  
247  
248  
249  
250  
251  
252  
253  
254  
255  
256  
257  
258  
259  
260  
261  
262  
263  
264  
265  
266  
267  
268  
269  
270  
271  
272  
273  
274  
275  
276  
277  
278  
279  
280  
281  
282  
283  
284  
285  
286  
287  
288  
289  
290  
291  
292  
293  
294  
295  
296  
297  
298  
299  
300  
301  
302  
303  
304  
305  
306  
307  
308  
309  
310  
311  
312  
313  
314  
315  
316  
317  
318  
319  
320  
321  
322  
323  
324  
325  
326  
327  
328  
329  
330  
331  
332  
333  
334  
335  
336  
337  
338  
339  
340  
341  
342  
343  
344  
345  
346  
347  
348  
349  
350  
351  
352  
353  
354  
355  
356  
357  
358  
359  
360  
361  
362  
363  
364  
365  
366  
367  
368  
369  
370  
371  
372  
373  
374  
375  
376  
377  
378  
379  
380  
381  
382  
383  
384  
385  
386  
387  
388  
389  
390  
391  
392  
393  
394  
395  
396  
397  
398  
399  
400  
401  
402  
403  
404  
405  
406  
407  
408  
409  
410  
411  
412  
413  
414  
415  
416  
417  
418  
419  
420  
421  
422  
423  
424  
425  
426  
427  
428  
429  
430  
431  
432  
433  
434  
435  
436  
437  
438  
439  
440  
441  
442  
443  
444  
445  
446  
447  
448  
449  
450  
451  
452  
453  
454  
455  
456  
457  
458  
459  
460  
461  
462  
463  
464  
465  
466  
467  
468  
469  
470  
471  
472  
473  
474  
475  
476  
477  
478  
479  
480  
481  
482  
483  
484  
485  
486  
487  
488  
489  
490  
491  
492  
493  
494  
495  
496  
497  
498  
499  
500  
501  
502  
503  
504  
505  
506  
507  
508  
509  
510  
511  
512  
513  
514  
515  
516  
517  
518  
519  
520  
521  
522  
523  
524  
525  
526  
527  
528  
529  
530  
531  
532  
533  
534  
535  
536  
537  
538  
539  
540  
541  
542  
543  
544  
545  
546  
547  
548  
549  
550  
551  
552  
553  
554  
555  
556  
557  
558  
559  
560  
561  
562  
563  
564  
565  
566  
567  
568  
569  
570  
571  
572  
573  
574  
575  
576  
577  
578  
579  
580  
581  
582  
583  
584  
585  
586  
587  
588  
589  
590  
591  
592  
593  
594  
595  
596  
597  
598  
599  
600  
601  
602  
603  
604  
605  
606  
607  
608  
609  
610  
611  
612  
613  
614  
615  
616  
617  
618  
619  
620  
621  
622  
623  
624  
625  
626  
627  
628  
629  
630  
631  
632  
633  
634  
635  
636  
637  
638  
639  
640  
641  
642  
643  
644  
645  
646  
647  
648  
649  
650  
651  
652  
653  
654  
655  
656  
657  
658  
659  
660  
661  
662  
663  
664  
665  
666  
667  
668  
669  
670  
671  
672  
673  
674  
675  
676  
677  
678  
679  
680  
681  
682  
683  
684  
685  
686  
687  
688  
689  
690  
691  
692  
693  
694  
695  
696  
697  
698  
699  
700  
701  
702  
703  
704  
705  
706  
707  
708  
709  
710  
711  
712  
713  
714  
715  
716  
717  
718  
719  
720  
721  
722  
723  
724  
725  
726  
727  
728  
729  
730  
731  
732  
733  
734  
735  
736  
737  
738  
739  
740  
741  
742  
743  
744  
745  
746  
747  
748  
749  
750  
751  
752  
753  
754  
755  
756  
757  
758  
759  
760  
761  
762  
763  
764  
765  
766  
767  
768  
769  
770  
771  
772  
773  
774  
775  
776  
777  
778  
779  
780  
781  
782  
783  
784  
785  
786  
787  
788  
789  
790  
791  
792  
793  
794  
795  
796  
797  
798  
799  
800  
801  
802  
803  
804  
805  
806  
807  
808  
809  
810  
811  
812  
813  
814  
815  
816  
817  
818  
819  
820  
821  
822  
823  
824  
825  
826  
827  
828  
829  
830  
831  
832  
833  
834  
835  
836  
837  
838  
839  
840  
841  
842  
843  
844  
845  
846  
847  
848  
849  
850  
851  
852  
853  
854  
855  
856  
857  
858  
859  
860  
861  
862  
863  
864  
865  
866  
867  
868  
869  
870  
871  
872  
873  
874  
875  
876  
877  
878  
879  
880  
881  
882  
883  
884  
885  
886  
887  
888  
889  
890  
891  
892  
893  
894  
895  
896  
897  
898  
899  
900  
901  
902  
903  
904  
905  
906  
907  
908  
909  
910  
911  
912  
913  
914  
915  
916  
917  
918  
919  
920  
921  
922  
923  
924  
925  
926  
927  
928  
929  
930  
931  
932  
933  
934  
935  
936  
937  
938  
939  
940  
941  
942  
943  
944  
945  
946  
947  
948  
949  
950  
951  
952  
953  
954  
955  
956  
957  
958  
959  
960  
961  
962  
963  
964  
965  
966  
967  
968  
969  
970  
971  
972  
973  
974  
975  
976  
977  
978  
979  
980  
981  
982  
983  
984  
985  
986  
987  
988  
989  
990  
991  
992  
993  
994  
995  
996  
997  
998  
999  
1000

1  
2  
3 recruitment strategies for South Asians in these studies, and the majority of the evidence  
4  
5 is in the context of clinical trials. The usefulness of the proposed recruitment strategies  
6  
7 outside of the clinical trial setting is unknown. The applicability of the strategies  
8  
9 presented may vary, as some proposed solutions are relatively straightforward, while  
10  
11 others are more complex and difficult to apply. As discussed by Waheed et al.,[33]  
12  
13 changing recruitment venues may be easy, but provision of appropriate incentives and  
14  
15 catering to specific health and cultural beliefs may be more difficult to execute. The  
16  
17 primary types of studies that have been used to investigate potential recruitment  
18  
19 strategies in South Asian populations include focus groups and interviews. These  
20  
21 studies provide valuable insight into participant and researcher perspectives, but do not  
22  
23 directly address the quantitative impact of barriers or facilitators or effectiveness of  
24  
25 recruitment strategies. Where empirical data exists, it is often limited to descriptive rates  
26  
27 of recruitment and retention based on the results of quantitative surveys or prospective  
28  
29 cohort studies. Documentation of barriers to recruitment in future studies including South  
30  
31 Asian participants via qualitative interviews during the recruitment process would help to  
32  
33 address this gap. As well, assessment tools, such as the Barriers to Research  
34  
35 Participation Questionnaire, may assist in determining hurdles to research participation  
36  
37 in specific populations in a structured manner [52]. Since this was a scoping review  
38  
39 aimed at mapping the current literature on this topic, we did not complete a quality  
40  
41 assessment of the data. The search date restrictions that were imposed may have  
42  
43 excluded studies with valuable historical perspectives. Also, we did not search  
44  
45 databases of qualitative research, which may have resulted in oversight of relevant  
46  
47 evidence. We attempted to overcome this to some extent with the grey literature search  
48  
49 strategies. However, we believe this review captures a relevant snapshot of the most up-  
50  
51 to-date research on this topic.  
52  
53  
54  
55  
56  
57  
58  
59  
60

1  
2  
3 The evidence reviewed suggests that recruitment methods aimed at engaging  
4 with the target population may have a positive impact. One such intervention that was  
5 not discussed explicitly by the included studies is community based participatory  
6 research, which employs strategies such as involving trusted community members as  
7 study staff, which has been shown to be effective at mitigating ethical and cultural  
8 challenges in research [53]. This approach may have the potential to mobilize individuals  
9 to take ownership of their health and encourage education and participation within their  
10 communities, and to ensure appropriate dissemination of findings [54,55]. The paucity of  
11 evidence, particularly in the Canadian context, suggests that work is still needed to  
12 determine context-specific barriers and facilitators to recruitment, and associated  
13 strategies to increase the participation of South Asians in health research. A mixed-  
14 methods synthesis from the Canadian perspective linking experiences of individuals and  
15 groups to the evidence on effectiveness of recruitment strategies may shed some light  
16 on potential approaches researchers could employ in future studies. Given the lack of  
17 empirical data, proposed recruitment strategies should be quantitatively evaluated to  
18 determine the relative effectiveness and value.  
19  
20  
21  
22  
23  
24  
25  
26  
27  
28  
29  
30  
31  
32  
33  
34  
35  
36

### 37 **Conclusions**

38  
39 Better representation of South Asians in health research may promote  
40 development of tailored treatment, increased awareness and ownership of health, and  
41 support the ultimate goals of improving the health of the South Asian population and  
42 reducing healthcare spending. The information presented in this review can be used to  
43 assist researchers when preparing to conduct research, and may help to inform a more  
44 in-depth analysis of this issue from a Canadian perspective. Consideration of these  
45 issues during the grant writing and protocol stages of research may decrease the risk of  
46 encountering recruitment problems at latter stages.  
47  
48  
49  
50  
51  
52  
53  
54  
55  
56  
57  
58  
59  
60



## ACKNOWLEDGEMENTS

YL acknowledges funding from the Canada Research Chair program of the Canadian Institutes of Health Research. PJ is supported by a Senior Scientist Salary Award from the BC Children's Hospital Research Institute.

## COMPETING INTERESTS

We have read and understood BMJ policy on declaration of interests and declare the following interests: TQ is an employee of the Canadian Agency for Drugs and Technologies in Health.

## FUNDING STATEMENT

This research received no specific grant from any funding agency in the public, commercial or not-for-profit sectors.

## AUTHOR CONTRIBUTIONS

TQ, PJ, and YL were all involved in the conception of the review. TQ wrote the review protocol and TQ and LF were involved in conduct of the review. TQ wrote the initial draft. LF, PJ, and YL were involved in reviewing the manuscript and in critical revision of the manuscript. All authors read and approved the final manuscript.

## DATA SHARING STATEMENT

A copy of the unpublished study protocol is available upon request from the corresponding author.

## REFERENCES

- 1 Government of Canada SC. National Household Survey: Immigration and Ethnocultural Diversity. 2014. <http://www5.statcan.gc.ca/olc-cel/olc.action?ObjId=99-010-X&ObjType=2&lang=en&limit=1> (accessed 27 May2015).
- 2 Ethnicity and National Identity in England and Wales - Office for National Statistics. <http://www.ons.gov.uk/peoplepopulationandcommunity/culturalidentity/ethnicity/articles/ethnicityandnationalidentityinenglandandwales/2012-12-11> (accessed 19 Jun2016).
- 3 Statistics Canada. Projections of the Diversity of the Canadian Population. 2013. <http://www12.statcan.gc.ca/census-recensement/2011/ref/92-135/surveys-enquetes/vismin-population-minvis-eng.cfm> (accessed 10 Jul2014).
- 4 Asanin J, Wilson K. "I spent nine years looking for a doctor": exploring access to health care among immigrants in Mississauga, Ontario, Canada. *Soc Sci Med* 1982 2008;**66**:1271–83. doi:10.1016/j.socscimed.2007.11.043
- 5 Hussain-Gambles M, Atkin K, Leese B. Why ethnic minority groups are under-represented in clinical trials: a review of the literature. *Health Soc Care Community* 2004;**12**:382–8. doi:10.1111/j.1365-2524.2004.00507.x
- 6 Hilton BA, Grewal S, Popatia N, *et al*. The desi ways: traditional health practices of South Asian women in Canada. *Health Care Women Int* 2001;**22**:553–67. doi:10.1080/07399330127195
- 7 Bhandari N, Taneja S, Rongsen T, *et al*. Implementation of the WHO Multicentre Growth Reference Study in India. *Food Nutr Bull* 2004;**25**:S66-71.
- 8 Jolly K, Lip GY, Taylor RS, *et al*. Recruitment of ethnic minority patients to a cardiac rehabilitation trial: the Birmingham Rehabilitation Uptake Maximisation (BRUM) study [ISRCTN72884263]. *BMC Med Res Methodol* 2005;**5**:18. doi:10.1186/1471-2288-5-18
- 9 Bajaj S, Jawad F, Islam N, *et al*. South Asian women with diabetes: Psychosocial challenges and management: Consensus statement. *Indian J Endocrinol Metab* 2013;**17**:548–62. doi:10.4103/2230-8210.113720
- 10 Statistics Canada. The South Asian Community in Canada. 2007. <http://www.statcan.gc.ca/pub/89-621-x/89-621-x2007006-eng.htm> (accessed 19 Aug2013).
- 11 Lucas A, Murray E, Kinra S. Heath beliefs of UK South Asians related to lifestyle diseases: a review of qualitative literature. *J Obes* 2013;**2013**:827674. doi:10.1155/2013/827674
- 12 Grewal K, Stewart DE, Grace SL. Differences in social support and illness perceptions among South Asian and Caucasian patients with coronary artery disease. *Heart Lung J Crit Care* 2010;**39**:180–7. doi:10.1016/j.hrtlng.2009.06.016

- 1  
2  
3 13 Nilaweera I, Doran F, Fisher J. Prevalence, nature and determinants of postpartum  
4 mental health problems among women who have migrated from South Asian to high-  
5 income countries: a systematic review of the evidence. *J Affect Disord*  
6 2014;**166**:213–26. doi:10.1016/j.jad.2014.05.021  
7
- 8  
9 14 Veenstra G, Patterson AC. South Asian-White health inequalities in Canada:  
10 intersections with gender and immigrant status. *Ethn Health* 2016;:1–10.  
11 doi:10.1080/13557858.2016.1179725  
12
- 13 15 Gupta M, Singh N, Verma S. South Asians and Cardiovascular Risk What Clinicians  
14 Should Know. *Circulation* 2006;**113**:e924–9.  
15 doi:10.1161/CIRCULATIONAHA.105.583815  
16
- 17 16 Anand SS, Yusuf S, Vuksan V, *et al.* Differences in risk factors, atherosclerosis, and  
18 cardiovascular disease between ethnic groups in Canada: the Study of Health  
19 Assessment and Risk in Ethnic groups (SHARE). *Lancet* 2000;**356**:279–84.  
20
- 21 17 Rana A, Souza RJ de, Kandasamy S, *et al.* Cardiovascular risk among South Asians  
22 living in Canada: a systematic review and meta-analysis. *Can Med Assoc Open*  
23 *Access J* 2014;**2**:E183–91. doi:10.9778/cmajo.20130064  
24
- 25 18 Sheikh A, Halani L, Bhopal R, *et al.* Facilitating the Recruitment of Minority Ethnic  
26 People into Research: Qualitative Case Study of South Asians and Asthma. *PLoS*  
27 *Med* 2009;**6**:e1000148. doi:10.1371/journal.pmed.1000148  
28
- 29 19 Razak F, Anand SS, Shannon H, *et al.* Defining obesity cut points in a multiethnic  
30 population. *Circulation* 2007;**115**:2111–8.  
31 doi:10.1161/CIRCULATIONAHA.106.635011  
32
- 33 20 Twells LK, Gregory DM, Reddigan J, *et al.* Current and predicted prevalence of  
34 obesity in Canada: a trend analysis. *CMAJ Open* 2014;**2**:E18–26.  
35 doi:10.9778/cmajo.20130016  
36
- 37 21 Chiu M, Austin PC, Manuel DG, *et al.* Deriving Ethnic-Specific BMI Cutoff Points for  
38 Assessing Diabetes Risk. *Diabetes Care* 2011;**34**:1741–8. doi:10.2337/dc10-2300  
39
- 40 22 Nanditha A, Ma RCW, Ramachandran A, *et al.* Diabetes in Asia and the Pacific:  
41 Implications for the Global Epidemic. *Diabetes Care* 2016;**39**:472–85.  
42 doi:10.2337/dc15-1536  
43
- 44 23 Sword W, Watt S, Krueger P. Postpartum health, service needs, and access to care  
45 experiences of immigrant and Canadian-born women. *J Obstet Gynecol Neonatal*  
46 *Nurs JOGNN NAACOG* 2006;**35**:717–27. doi:10.1111/j.1552-6909.2006.00092.x  
47
- 48 24 George S, Duran N, Norris K. A systematic review of barriers and facilitators to  
49 minority research participation among African Americans, Latinos, Asian Americans,  
50 and Pacific Islanders. *Am J Public Health* 2014;**104**:e16–31.  
51 doi:10.2105/AJPH.2013.301706  
52  
53  
54  
55  
56  
57  
58  
59  
60

- 1  
2  
3 25 Hussain-Gambles M, Leese B, Atkin K, *et al.* Involving South Asian patients in  
4 clinical trials. *Health Technol Assess Winch Engl* 2004;**8**:iii, 1-109.  
5  
6  
7 26 Khan M, Kobayashi K, Lee SM, *et al.* (In)Visible Minorities in Canadian Health Data  
8 and Research. *Popul Change Lifecourse Strateg Knowl Clust Discuss Pap Ser Un*  
9 *Réseau Strat Connaiss Chang Popul Parcours Vie Doc Trav* 2015;**3**:5.  
10  
11 27 Macneill V, Nwokoro C, Griffiths C, *et al.* Recruiting ethnic minority participants to a  
12 clinical trial: a qualitative study. *BMJ Open* 2013;**3**. doi:10.1136/bmjopen-2013-  
13 002750  
14  
15 28 Mason S, Hussain-Gambles M, Leese B, *et al.* Representation of South Asian  
16 people in randomised clinical trials: analysis of trials' data. *BMJ* 2003;**326**:1244–5.  
17 doi:10.1136/bmj.326.7401.1244  
18  
19 29 Khunti K, Bellary S, Karamat MA, *et al.* Representation of people of South Asian  
20 origin in cardiovascular outcome trials of glucose-lowering therapies in Type 2  
21 diabetes. *Diabet Med J Br Diabet Assoc* Published Online First: 1 March 2016.  
22 doi:10.1111/dme.13103  
23  
24 30 Hussain-Gambles M, Atkin K, Leese B. South Asian participation in clinical trials: the  
25 views of lay people and health professionals. *Health Policy Amst Neth* 2006;**77**:149–  
26 65. doi:10.1016/j.healthpol.2005.07.022  
27  
28 31 Arksey H, O'Malley L. Scoping studies: towards a methodological framework. *Int J*  
29 *Soc Res Methodol* 2005;**8**:19–32. doi:10.1080/1364557032000119616  
30  
31 32 Levac D, Colquhoun H, O'Brien KK. Scoping studies: advancing the methodology.  
32 *Implement Sci* 2010;**5**:69. doi:10.1186/1748-5908-5-69  
33  
34 33 Waheed W, Husain N, Allen G, *et al.* Recruitment strategies for British South Asians  
35 in 5 depression trials: A mixed method study. *J Affect Disord* 2015;**185**:195–203.  
36 doi:10.1016/j.jad.2015.06.046  
37  
38 34 Garduño-Díaz SD, Husain W, Ashkanani F, *et al.* Meeting challenges related to the  
39 dietary assessment of ethnic minority populations. *J Hum Nutr Diet Off J Br Diet*  
40 *Assoc* 2014;**27**:358–66. doi:10.1111/jhn.12153  
41  
42 35 Douglas A, Bhopal RS, Bhopal R, *et al.* Recruiting South Asians to a lifestyle  
43 intervention trial: experiences and lessons from PODOSA (Prevention of Diabetes &  
44 Obesity in South Asians). *Trials* 2011;**12**:220. doi:10.1186/1745-6215-12-220  
45  
46 36 Rooney LK, Bhopal R, Halani L, *et al.* Promoting recruitment of minority ethnic  
47 groups into research: qualitative study exploring the views of South Asian people  
48 with asthma. *J Public Health Oxf Engl* 2011;**33**:604–15. doi:10.1093/pubmed/fdq100  
49  
50 37 Samsudeen BS, Douglas A, Bhopal RS. Challenges in recruiting South Asians into  
51 prevention trials: health professional and community recruiters' perceptions on the  
52 PODOSA trial. *Public Health* 2011;**125**:201–9. doi:10.1016/j.puhe.2011.01.013  
53  
54  
55  
56  
57  
58  
59  
60

- 1  
2  
3 38 Stirland L, Halani L, Raj B, *et al.* Recruitment of South Asians into asthma research:  
4 qualitative study of UK and US researchers. *Prim Care Respir J J Gen Pract Airw*  
5 *Group* 2011;**20**:282–290, 8 p following 290. doi:10.4104/pcrj.2011.00032  
6  
7  
8 39 Lloyd CE, Johnson MR, Mughal S, *et al.* Securing recruitment and obtaining  
9 informed consent in minority ethnic groups in the UK. *BMC Health Serv Res*  
10 2008;**8**:68. doi:10.1186/1472-6963-8-68  
11  
12 40 Mohammadi N, Jones T, Evans D. Participant recruitment from minority religious  
13 groups: the case of the Islamic population in South Australia. *Int Nurs Rev*  
14 2008;**55**:393–8. doi:10.1111/j.1466-7657.2008.00647.x  
15  
16 41 Krupp K, Madhivanan P, Karat C, *et al.* Novel recruitment strategies to increase  
17 participation of women in reproductive health research in India. *Glob Public Health*  
18 2007;**2**:395–403. doi:10.1080/17441690701238031  
19  
20 42 Pratt B, Van C, Cong Y, *et al.* Perspectives from South and East Asia on Clinical and  
21 Research Ethics: A Literature Review. *J Empir Res Hum Res Ethics* 2014;**9**:52–67.  
22 doi:10.1525/jer.2014.9.2.52  
23  
24 43 Symonds RP, Lord K, Mitchell AJ, *et al.* Recruitment of ethnic minorities into cancer  
25 clinical trials: experience from the front lines. *Br J Cancer* 2012;**107**:1017–21.  
26 doi:10.1038/bjc.2012.240  
27  
28 44 Ahmad F, Gupta H, Rawlins J, *et al.* Preferences for gender of family physician  
29 among Canadian European-descent and South-Asian immigrant women. *Fam Pract*  
30 2002;**19**:146–53.  
31  
32 45 Lee SK, Sulaiman-Hill CR, Thompson SC. Overcoming language barriers in  
33 community-based research with refugee and migrant populations: options for using  
34 bilingual workers. *BMC Int Health Hum Rights* 2014;**14**:11. doi:10.1186/1472-698X-  
35 14-11  
36  
37 46 Neelotpol S, Hay AWM, Jolly AJ, *et al.* Challenges in collecting clinical samples for  
38 research from pregnant women of South Asian origin: evidence from a UK study.  
39 *BMJ Open* 2016;**6**:e010554. doi:10.1136/bmjopen-2015-010554  
40  
41 47 Marshall A, Batten S. Researching Across Cultures: Issues of Ethics and Power.  
42 *Forum Qual Sozialforschung Forum Qual Soc Res* 2004;**5**.[http://www.qualitative-](http://www.qualitative-research.net/index.php/fqs/article/view/572)  
43 [research.net/index.php/fqs/article/view/572](http://www.qualitative-research.net/index.php/fqs/article/view/572) (accessed 13 Feb2015).  
44  
45 48 Inclusion: The Politics of Difference in Medical Research, Epstein.  
46 <http://press.uchicago.edu/ucp/books/book/chicago/l/bo5414954.html> (accessed 20  
47 Jun2016).  
48  
49 49 NIH Guidelines on the Inclusion of Women and Minorities as Subjects in Clinical  
50 Research - Amended, October, 2001.  
51 [https://grants.nih.gov/grants/funding/women\\_min/guidelines\\_amended\\_10\\_2001.htm](https://grants.nih.gov/grants/funding/women_min/guidelines_amended_10_2001.htm)  
52 (accessed 20 Jun2016).  
53  
54  
55  
56  
57  
58  
59  
60

- 1  
2  
3 50 Report on governmental health research policies promoting gender or sex differences  
4 sensitivity | Canadian Women's Health Network. <http://www.cwhn.ca/en/node/25386>  
5 (accessed 20 Jun2016).  
6  
7  
8 51 Glover M, Kira A, Johnston V, *et al.* A systematic review of barriers and facilitators to  
9 participation in randomized controlled trials by Indigenous people from New Zealand,  
10 Australia, Canada and the United States. *Glob Health Promot* 2015;**22**:21–31.  
11 doi:10.1177/1757975914528961  
12  
13 52 Kibler JL, Brisco K. Evaluation of a brief questionnaire for assessing Barriers to  
14 Research Participation. *Ethn Dis* 2006;**16**:547–50.  
15  
16 53 Minkler M. Community-based research partnerships: Challenges and opportunities. *J*  
17 *Urban Health Bull N Y Acad Med* 2005;**82**:ii3-ii12. doi:10.1093/jurban/jti034  
18  
19 54 Choudhry U k., Jandu S, Mahal J, *et al.* Health Promotion and Participatory Action  
20 Research with South Asian Women. *J Nurs Scholarsh* 2002;**34**:75–81.  
21 doi:10.1111/j.1547-5069.2002.00075.x  
22  
23 55 Getrich CM, Sussman AL, Campbell-Voytal K, *et al.* Cultivating a cycle of trust with  
24 diverse communities in practice-based research: a report from PRIME Net. *Ann Fam*  
25 *Med* 2013;**11**:550–8. doi:10.1370/afm.1543  
26  
27  
28  
29  
30  
31  
32  
33  
34  
35  
36  
37  
38  
39  
40  
41  
42  
43  
44  
45  
46  
47  
48  
49  
50  
51  
52  
53  
54  
55  
56  
57  
58  
59  
60

**FIGURE LEGENDS**

Figure 1: Flowchart of Included and Excluded Studies

For peer review only



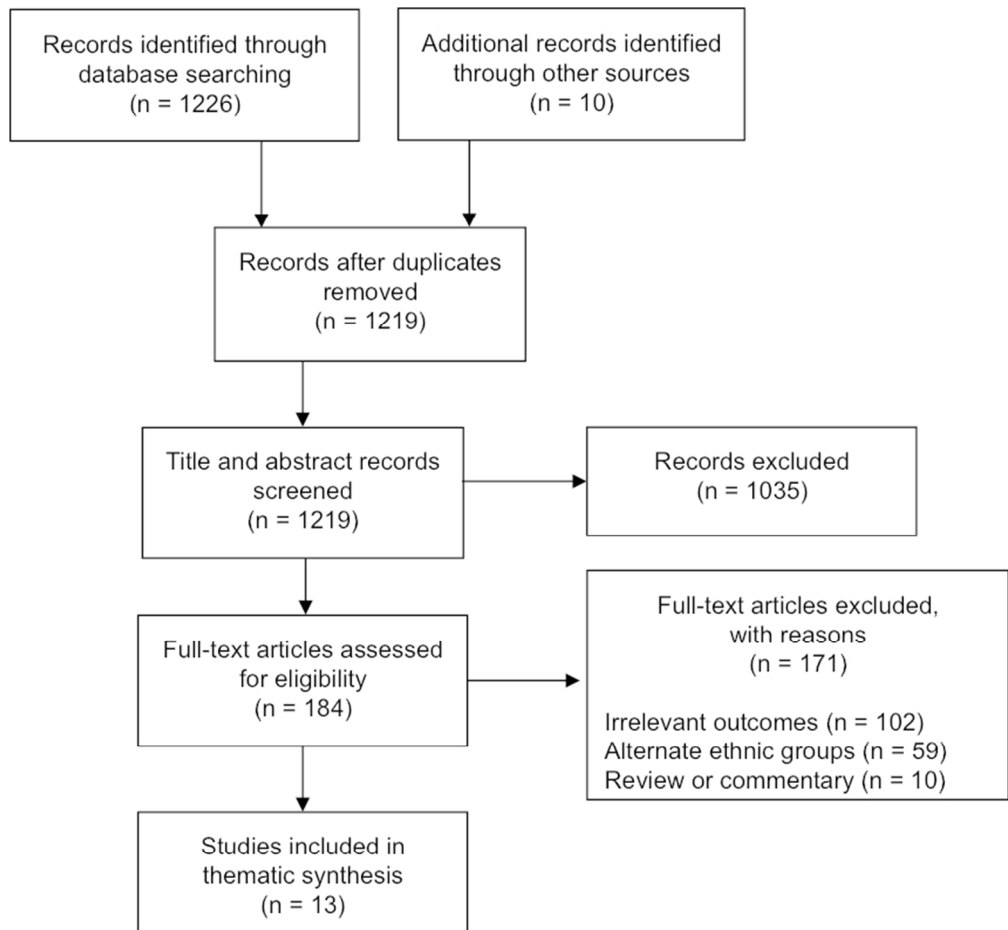

Figure 1: Flowchart of Included and Excluded Studies  
Figure 1

only



# BMJ Open

## Barriers and Facilitators to Recruitment of South Asians to Health Research: A Scoping Review

|                                 |                                                                                                                                                                                                                                                                                                                                                                                                                                                                                                                                                                                                                                                       |
|---------------------------------|-------------------------------------------------------------------------------------------------------------------------------------------------------------------------------------------------------------------------------------------------------------------------------------------------------------------------------------------------------------------------------------------------------------------------------------------------------------------------------------------------------------------------------------------------------------------------------------------------------------------------------------------------------|
| Journal:                        | <i>BMJ Open</i>                                                                                                                                                                                                                                                                                                                                                                                                                                                                                                                                                                                                                                       |
| Manuscript ID                   | bmjopen-2016-014889.R1                                                                                                                                                                                                                                                                                                                                                                                                                                                                                                                                                                                                                                |
| Article Type:                   | Research                                                                                                                                                                                                                                                                                                                                                                                                                                                                                                                                                                                                                                              |
| Date Submitted by the Author:   | 08-Feb-2017                                                                                                                                                                                                                                                                                                                                                                                                                                                                                                                                                                                                                                           |
| Complete List of Authors:       | Quay, Teo; Canadian Agency for Drugs and Technologies in Health; University of British Columbia, Faculty of Land and Food Systems<br>Frimer, Leora; McGill University Faculty of Medicine, Department of Epidemiology, Biostatistics and Occupational Health; University of British Columbia, School of Population and Public Health, Faculty of Medicine<br>Janssen, Patricia; University of British Columbia, School of Population and Public Health, Faculty of Medicine; BC Children's Hospital Research Institute<br>Lamers, Yvonne; University of British Columbia, Faculty of Land and Food Systems; BC Children's Hospital Research Institute |
| <b>Primary Subject Heading</b>: | Global health                                                                                                                                                                                                                                                                                                                                                                                                                                                                                                                                                                                                                                         |
| Secondary Subject Heading:      | Epidemiology                                                                                                                                                                                                                                                                                                                                                                                                                                                                                                                                                                                                                                          |
| Keywords:                       | recruitment, South Asian, minority health, patient selection, scoping review                                                                                                                                                                                                                                                                                                                                                                                                                                                                                                                                                                          |
|                                 |                                                                                                                                                                                                                                                                                                                                                                                                                                                                                                                                                                                                                                                       |

SCHOLARONE™  
Manuscripts

Only

**TITLE PAGE****Title**

Barriers and Facilitators to Recruitment of South Asians to Health Research: A Scoping Review

**Authors**

Teo A W Quay,<sup>1,2</sup> Leora Frimer,<sup>3,4</sup> Patricia A Janssen,<sup>4,5,6</sup> Yvonne Lamers<sup>2,5,6</sup>

**Affiliations**

<sup>1</sup>The Canadian Agency for Drugs and Technologies in Health, Ottawa, ON, Canada

<sup>2</sup>The University of British Columbia, Faculty of Land and Food Systems, Vancouver, BC, Canada

<sup>3</sup>Department of Epidemiology, Biostatistics and Occupational Health, McGill Faculty of Medicine, Montreal, QC, Canada

<sup>4</sup>School of Population and Public Health, Faculty of Medicine, University of British Columbia, Vancouver, BC, Canada

<sup>5</sup>BC Children's Hospital Research Institute, Vancouver, BC, Canada

<sup>6</sup>Women's Health Research Institute, Vancouver, BC, Canada

**Corresponding Author Information**

Yvonne Lamers  
Canada Research Chair in Human Nutrition and Vitamin Metabolism  
Assistant Professor, Food, Nutrition and Health  
Email: [yvonne.lamers@ubc.ca](mailto:yvonne.lamers@ubc.ca)  
Phone: +1 604-827-1776  
Fax: +1 604-822-5143  
FNH 245 - 2205 East Mall  
Vancouver, BC V6T 1Z4  
Canada

**Word Count of Body of Text** 4108

**Number of Tables** 4

**Number of Figures** 1

1  
2  
3 **Appendices: 1**

4  
5 **Number of References 67**

6  
7 **Word Count of Abstract 234**

8  
9 **Keywords and MeSH Headings:** Recruitment, South Asian, Minority Health, Patient  
10  
11 Selection, Scoping Review  
12  
13

14  
15  
16  
17  
18  
19  
20  
21  
22  
23  
24  
25  
26  
27  
28  
29  
30  
31  
32  
33  
34  
35  
36  
37  
38  
39  
40  
41  
42  
43  
44  
45  
46  
47  
48  
49  
50  
51  
52  
53  
54  
55  
56  
57  
58  
59  
60

For peer review only

## ABSTRACT

**Objectives** People of South Asian ethnicity are under-represented in health research studies. The objectives of this scoping review were to examine the barriers and facilitators to recruitment of South Asians to health research studies, and to describe strategies for improving recruitment.

**Design** Scoping review

**Methods** Using the Arksey and O'Malley framework for scoping reviews, we comprehensively searched electronic databases (MEDLINE via PubMed, Cochrane Library, CINAHL, PsycINFO). Studies that identified barriers and facilitators to recruitment, or recruitment strategies for South Asian populations were included. Recruitment barriers, facilitators, and strategies were grouped thematically, and summarized narratively.

**Synthesis** Of 1846 potentially relevant articles, 15 met the inclusion criteria and were included in the thematic synthesis. Multiple facilitators and barriers to enrollment of South Asians in health research studies were identified; these most commonly related to logistical challenges, language and cultural barriers, concerns about adverse consequences of participating, and mistrust of research. Several actionable strategies were discussed, the most common being engagement of South Asian communities, demonstration of cultural competency, provision of incentives and benefits, language sensitivity through the use of translators and translated materials, and the development of trust and personal relationships.

**Conclusion** There is a growing awareness of the barriers and facilitators to recruitment of South Asian participants to health research studies. Understanding of these approaches and implementation during the grant funding stages may reduce the risk of poor recruitment and representation of South Asians.

## ARTICLE SUMMARY

### Strengths and Limitations of this Study

- First scoping review to summarize evidence regarding factors that influence the involvement of South Asian participants in health research
- Comprehensive overview of the volume and characteristics of research published on this topic
- Actionable recruitment strategies and topics for further investigation clearly identified
- Published evidence only available from a few countries and primarily in the clinical trial setting with small sample sizes and variable patient populations so transferability to other contexts may be limited

## INTRODUCTION

South Asians are the largest ethnic minority in Canada and the United Kingdom (UK).[1,2] South Asian populations have demonstrated historical and projected growth in these regions. The total South Asian population in Canada is currently estimated at 1.6 million individuals (one quarter of the visible minority population, and 4.8% of the total population) and is projected to reach 3.2 to 4.1 million by 2031.[3] Two thirds of South Asians in Canada identify as East Indian with smaller proportions identifying as Pakistani, Sri Lankan, and Punjabi.[1] In the UK, South Asian ethnic groups had some of the largest population increases (0.4 million in each group) over the 2001 to 2011 time period (i.e., 0.4 million each in the Pakistani and Indian groups).[2]

South Asian populations face specific health challenges. An analysis of Canadian Community Health Survey data (2001 to 2013) concluded that South Asians are more likely to report poor self-rated health than Whites.[4] A higher proportion of South Asians suffer from health conditions including type 2 diabetes, cardiovascular disease, and asthma than people of European ethnicity,[5–9] and the rates of non-communicable disease are expected to rise.[10] South Asians are reported to develop non-communicable diseases at younger ages, despite fewer risk factors (e.g., at lower body mass index), than other ethnic groups.[5,11,12] Mental health is also an emerging area of concern, particularly in immigrant women who have been demonstrated to have a higher risk of post-partum depression.[13,14]

In the context of healthcare access, low socio-economic status,[15] racial and cultural discrimination,[16,17] geography (e.g., distance from research centre, lack of access to transportation),[18] language barriers,[19] and traditional hierarchies within families[20] have been reported to obstruct optimal health care of South Asians, and in particular South Asian women.[20] Frequently, South Asians maintain traditional

1  
2  
3 religious, dietary, and healthcare practices, which may not align with modern western or  
4 allopathic medicine[21] and clinical research approaches.[22,23] Lack of support from  
5 families and communities in seeking healthcare and making healthcare decisions may  
6 discourage South Asians from engaging in risk-reducing health behaviors, including  
7 participation in research.[24] Lack of English language proficiency, unfamiliarity with  
8 local services, and lack of attention to cultural factors by health care providers may pose  
9 a particular challenge to healthcare service access for female South Asians.[14]

10  
11 Adequate ethnic minority representation in health research is important to  
12 support generalizability of research findings and to enable tailored health care for ethnic  
13 minorities.[25,26] However, South Asians are underrepresented in research, resulting in  
14 healthcare practice based on research with limited external validity for the South Asian  
15 context.[27,28] In general, there is a lack of representative population health research  
16 comparing minority groups in Canada to European counterparts.[27] This under-  
17 representation also occurs elsewhere; a UK-based analysis reported that while South  
18 Asians make up 4.5% of the total population, they represented on average only 0.6% of  
19 participants in 6 multicenter randomized controlled trials.[2,29] Another review noted that  
20 trials assessing cardiovascular outcomes in type 2 diabetes patients had  
21 underrepresentation of South Asian populations compared to population proportions in  
22 the UK, but overrepresentation in the United States.[30] Even studies with sufficient  
23 numbers of South Asians may not be truly representative of the broad heterogeneous  
24 population, as diets, lifestyles, and baseline health risk is noted to vary across South  
25 Asians of different origin.[31]

26  
27 To better understand the current knowledge and perspectives on this topic, a  
28 scoping review of the evidence regarding barriers and facilitators to recruitment, and  
29 strategies that have been employed or evaluated to improve representation of South  
30  
31  
32  
33  
34  
35  
36  
37  
38  
39  
40  
41  
42  
43  
44  
45  
46  
47  
48  
49  
50  
51  
52  
53  
54  
55  
56  
57  
58  
59  
60

1  
2  
3  
4  
5  
6  
7  
8  
9  
10  
11  
12  
13  
14  
15  
16  
17  
18  
19  
20  
21  
22  
23  
24  
25  
26  
27  
28  
29  
30  
31  
32  
33  
34  
35  
36  
37  
38  
39  
40  
41  
42  
43  
44  
45  
46  
47  
48  
49  
50  
51  
52  
53  
54  
55  
56  
57  
58  
59  
60

Asians was undertaken. A preliminary search of the literature did not yield sufficient reports on the Canadian population, thus the review was expanded to include literature regarding South Asian populations residing in other countries.

For peer review only



## METHODS

A scoping review was undertaken according to the methods outlined by Arksey and O'Malley, and Levac et al.[32,33]. The Arksey and O'Malley approach involves the identification of a research question; a search for relevant studies; selection of studies, charting the data; collating, summarizing and reporting the results; and an optional consultation with stakeholders to inform or validate the findings.[32] We followed this approach with the exception of the consultation stage and employed several suggestions made by Levac et al. including a focused research question, the conduct of thematic synthesis, duplicate study selection, and standardized and duplicate extraction.[33] This methodology was justified given that there is limited knowledge on this topic, and there was interest in assessing the depth and breadth of the evidence-base. The aim was to identify barriers and facilitators to recruitment of South Asians to health research studies, and associated strategies to improve participation. The following specific research questions were addressed:

1. What are the barriers and facilitators to recruitment of South Asian individuals to health research studies?
2. What are the evidence-based strategies for recruitment of South Asian individuals to health research studies?

## DATA SOURCES AND SEARCH

The search strategy was developed and executed by one reviewer (TQ). A comprehensive search was conducted using PubMed, the Cochrane Library, CINAHL, and PsycINFO. Medical subject headings and keywords including South Asian, minority groups, patient selection, recruitment, enrolment, recruitment strategies, and specific South Asian ethnicities were searched from January 2004 through October 2014, and

updated in April 2016 (Table 1). Search terms are presented in Table 1. The full search string is presented in Appendix 1.

**Table 1. Scoping Review Search Terms**

| <b>A. Ethnicity-Related Search Terms</b> | <b>B. Strategy-Related Search Terms</b> |
|------------------------------------------|-----------------------------------------|
| South Asian or South Asia                | Patient selection [MeSH term]           |
| Minority groups [MeSH term]              | Recruitment                             |
| Minority health [MeSH term]              | Enrolment                               |
| Sri Lankan or Sri Lanka                  | Recruitment strategies                  |
| Bangladeshi or Bangladesh                | OR any of the above                     |
| Pakistani or Pakistan                    |                                         |
| Nepalese or Nepal                        |                                         |
| Bhutanese or Bhutan                      |                                         |
| Maldivian or Maldives                    |                                         |
| Indian or India                          |                                         |
| OR any of the above                      |                                         |

A AND B

The full search strategy is available upon request from the authors. The search dates were restricted in the interest of identifying the most up-to-date evidence on the topic.

The search was supplemented by scanning reference lists of included studies, searching clinicaltrials.gov and PROSPERO for ongoing work, and by a focused internet search.

Study selection was limited to English language articles or articles that could be translated using Google Translate. No restriction was made by publication type. Results from all searches were pooled and de-duplicated prior to screening.

### **Study Selection**

All types of studies including primary randomized and non-randomized quantitative and qualitative studies, and systematic reviews were included. Commentaries and narrative reviews were excluded. We included studies involving South Asian individuals (e.g., Sri Lankan, Bangladeshi, Pakistani, Nepalese, Bhutanese, Maldivian, Indian) in any setting, or studies involving multiple ethnic groups where South Asians were a specified subgroup or comprised the majority of participants. Studies assessing or reporting on barriers and facilitators to recruitment, and recruitment strategies were included. This

1  
2  
3 includes studies determining, assessing the impact or effectiveness, or assessing the  
4 comparative impact or effectiveness of barriers, facilitators, and recruitment strategies.  
5  
6 One reviewer (TQ) independently screened titles and abstracts against the pre-specified  
7 eligibility criteria. A second reviewer (LF) then screened selected abstracts. Full text  
8 articles were obtained and reviewed by both authors for studies that appeared to meet  
9 the eligibility criteria or where eligibility could not be adequately judged. Disagreement  
10 was resolved by discussion among the two reviewers with a third reviewer consulted if  
11 deemed necessary. Study authors were not contacted for further information.  
12  
13  
14  
15  
16  
17  
18  
19

### 20 **Data Abstraction**

21  
22 Data abstraction was conducted in duplicate by two authors (TQ and LF) using a  
23 structured extraction form piloted on two studies. Disagreement was resolved via  
24 discussion. Data including a) study classifiers (lead author, publication year, country), b)  
25 study characteristics (sample size, study design, subject characteristics), and c)  
26 recruitment barriers, facilitators for participation, and recruitment strategy data was  
27 extracted. Specific descriptions of recruitment barriers, facilitators, and strategies were  
28 recorded.  
29  
30  
31  
32  
33  
34  
35  
36

37 Barriers and facilitators, and recruitment strategies were grouped thematically into key  
38 topics. Once established, these themes were presented and discussed narratively. No  
39 formal data synthesis or assessment of intervention effectiveness was undertaken.  
40  
41  
42

43 Quality appraisal of selected studies is outside the scope of this review, but general  
44 limitations are discussed. In addition, no formal consultation exercise with stakeholders  
45 was conducted.  
46  
47  
48  
49

## 50 **RESULTS**

### 51 **Literature Search**

1  
2  
3 The original search on PubMed and Cochrane (2004 to October 2014) identified 1027  
4 potentially relevant publications. A further 10 studies were identified from grey literature  
5 sources. The original search was updated in April 2016 and 199 more potentially  
6 relevant articles were identified. Also, the databases CINAHL and PsycINFO were added  
7 and these searches (2004 to April 2016) identified 645 more potentially relevant articles.  
8 In total, 1846 records were screened after duplicates were removed. Based on title and  
9 abstract 1648 records were excluded and 198 full-texts were screened (Figure 1). Of the  
10 198 studies included for full-text review, 183 were excluded for various reasons (i.e.,  
11 irrelevant outcomes, study of alternate ethnic groups, review or commentary) and 15  
12 articles met the inclusion criteria (n = 9 from original PubMed search; n = 4 from PubMed  
13 search update; n = 2 from CINAHL and PsycINFO) and were included in this report.

### 24 25 26 27 **Study Characteristics**

28 The final fifteen articles included in this review focused on South Asian populations and  
29 discussed barriers and motivations for participation in research, and potential strategies  
30 for recruitment. Primary study characteristics including research area, study populations,  
31 sample size, and study design are noted in Table 2.

**Table 2. Study Characteristics.**

| First Author, Year           | Country   | Research Area                | Ethnic Populations                                        | Sample Size                                                                | Study Design                                        |
|------------------------------|-----------|------------------------------|-----------------------------------------------------------|----------------------------------------------------------------------------|-----------------------------------------------------|
| Waheed, 2016[34]             | UK        | Mental Health (Depression)   | South Asians                                              | 5 studies (n = 292)                                                        | Mixed-methods study                                 |
| Brown, 2014[35]              | UK        | Mental Health                | South Asians                                              | n = 10 study participants; n = 9 non-participants; n = 5 researchers       | Qualitative (thematic analysis of research diaries) |
| Garduno-Diaz, 2014 [36]      | UK        | Diet and Nutrition           | South Asians                                              | n = 300 adults, n = 100 children                                           | Literature review and dietary survey                |
| Mac Neill, 2013 [28]         | UK        | Asthma, Clinical Trials      | Multiple ethnic groups (primarily Bangladeshi)            | n = 42 parents (n = 20 Bangladeshi, n = 22 other)                          | Qualitative Interviews                              |
| Douglas, 2011 [37]           | UK        | Diabetes                     | South Asians                                              | n = 1319 potential recruits                                                | Descriptive review of recruitment experiences       |
| Rooney, 2011 [38]            | UK        | Asthma                       | South Asians                                              | n = 58 people with asthma                                                  | Qualitative focus groups                            |
| Samsudeen, 2011 [39]         | UK        | Diabetes - Obesity           | South Asians                                              | n = 22 health professionals, n = 27 community workers                      | Quantitative survey                                 |
| Stirland, 2011 [40]          | US/UK     | Asthma                       | South Asians                                              | n = 36 researchers                                                         | Qualitative interviews                              |
| Sheikh, 2009 [8]             | US/UK     | Asthma                       | South Asians                                              | n = 36 researchers (19 UK, 17 US), n = 10 community members)               | Qualitative interviews                              |
| Lloyd, 2008 [41]             | UK        | Diabetes                     | South Asians (Sylheti and Mipuri peoples from Bangladesh) | n = 31 participants                                                        | Qualitative interviews                              |
| Mohammadi, 2008 [42]         | Australia | Hospitalized Patients        | Islamic South Asians                                      | n = 13 participants enrolled                                               | Interpretive hermeneutic study                      |
| Krupp, 2007 [43]             | India     | Reproductive Health Research | South Asian women                                         | n = 918 enrolled participants                                              | Prospective cohort study                            |
| Hussain-Gambles, 2006 [31]   | UK        | Clinical Trials              | South Asian health professional and lay persons           | 25 health professionals, n = 60 lay persons                                | Qualitative interviews                              |
| Hussain-Gambles*, 2004* [26] | UK        | Clinical Trials              | South Asians                                              | n = 25 health professionals, n = 60 lay persons, n = 15 trial participants | Literature review and qualitative interviews        |
| Shelton, 2004 [44]           | US        | Spousal Abuse                | South Asian women (Bangladeshi)                           | n = 2 researchers; number of participants NR                               | Qualitative survey                                  |

\*Some common data between publications

NR = not reported; UK = United Kingdom; US = United States

1  
2  
3 Study populations ranged in size from n=2 to n=1319. The majority of studies were  
4 conducted in specific clinical populations. This included patients with mental health  
5 issues,[34,35] nutritional concerns,[36] asthma,[8,28,38,40] diabetes,[37,39,41]  
6 obesity,[39] in hospital (i.e., tertiary care),[42] with reproductive health concerns,[43] who  
7 were being recruited for clinical trials,[26,31] and for a study on spousal abuse.[44]  
8  
9 Study designs included prospective cohort studies,[43] thematic analysis[35], qualitative  
10 surveys, interviews and focus groups,[8,26,28,31,38,40,41,44] literature reviews,[31,36]  
11 quantitative surveys,[36,39] retrospective descriptive accounts of recruitment  
12 experiences,[37] hermeneutic studies,[42] and mixed-methods syntheses.[34]  
13  
14

15  
16 Most of the studies employed qualitative or survey-based techniques. As such,  
17 most outcome data is sourced from direct interview statements and personal experience.  
18 Limited empirical evidence on the effectiveness of the various recruitment strategies  
19 discussed was available.[34,36,39,43] Most of the included studies were conducted in  
20 the UK [8,26,28,31,34–41] and dealt with recruitment of clinical populations to clinical  
21 trials.[8,26,28,31,34,37–41]  
22  
23

### 24 **Facilitators**

25  
26 Three studies conducted in the UK [26,28,39] reported on facilitators of participation in  
27 research. Subjects perceived participation in research to be a possible route to improved  
28 treatment and health [26,28]. Participants also reported being motivated by the  
29 importance of disease prevention and potential to contribute to scientific knowledge  
30 [26,39], by the potential to help society through participation [26], and by a sense of  
31 obligation to healthcare providers [26]. It was reported that higher social class and  
32 education, and younger age influence the level of awareness of clinical trials in South  
33 Asians.[26]  
34  
35

### 36 **Barriers**

1  
2  
3 Potential barriers to recruitment of South Asians are outlined in Table 3. Participant-  
4 related factors followed themes of disinterest or lacking a feeling of belonging, conflicts,  
5 education or training-related deficits, logistical issues or opportunity cost, and factors  
6 related to fear or inhibition. Factors attributed to the researcher or research process  
7 followed themes of culture or language related issues, logistical issues, issues related to  
8 study design, and lack of awareness.  
9  
10  
11  
12  
13  
14  
15  
16  
17  
18  
19  
20  
21  
22  
23  
24  
25  
26  
27  
28  
29  
30  
31  
32  
33  
34  
35  
36  
37  
38  
39  
40  
41  
42  
43  
44  
45  
46  
47  
48  
49  
50  
51  
52  
53  
54  
55  
56  
57  
58  
59  
60

**Table 3. Barriers to Recruitment of South Asian Populations**

| Recruitment Barrier                                                              | First Author, Year of Publication |                 |                      |                    |                   |                      |                  |                  |                           |                   |                           |
|----------------------------------------------------------------------------------|-----------------------------------|-----------------|----------------------|--------------------|-------------------|----------------------|------------------|------------------|---------------------------|-------------------|---------------------------|
|                                                                                  | Waheed, 2016 [34]                 | Brown, 2014[35] | Mac Neill, 2013 [28] | Douglas, 2011 [37] | Rooney, 2011 [38] | Samsudeen, 2011 [39] | Sheikh, 2009 [8] | Lloyd, 2008 [41] | Hussain-Gambles, 2004[26] | Shelton, 2004[44] | Hussain-Gambles, 2006[31] |
| <b>Participant-Related</b>                                                       |                                   |                 |                      |                    |                   |                      |                  |                  |                           |                   |                           |
| <i>-Disinterest or Lack of Feeling of Belonging</i>                              |                                   |                 |                      |                    |                   |                      |                  |                  |                           |                   |                           |
| Immigrant perceptions of not belonging to society meant to benefit from research |                                   |                 |                      |                    |                   |                      |                  |                  | X                         |                   | X                         |
| Lack of interest, misgivings about scientific importance or benefit              |                                   | X               |                      |                    |                   | X                    | X                |                  |                           |                   |                           |
| Prior treatment for disease (trial participation perceived as unnecessary)       | X                                 |                 |                      |                    |                   | X                    |                  |                  |                           |                   |                           |
| Utilization of disease-specific services (e.g., mental health services)          | X                                 |                 |                      |                    |                   |                      |                  |                  |                           |                   |                           |
| <i>-Conflicts</i>                                                                |                                   |                 |                      |                    |                   |                      |                  |                  |                           |                   |                           |
| Decisional hierarchies and gender                                                | X                                 | X               |                      |                    |                   |                      |                  |                  | X                         |                   |                           |
| Substance abuse or mental health issues                                          | X                                 |                 |                      |                    |                   |                      |                  |                  |                           |                   |                           |
| Religious or cultural conflicts                                                  | X                                 | X               |                      |                    |                   |                      |                  |                  |                           |                   | X                         |
| <i>-Education or Training-Related</i>                                            |                                   |                 |                      |                    |                   |                      |                  |                  |                           |                   |                           |
| Poor understanding of research intentions among community or religious leaders   |                                   |                 |                      |                    |                   |                      | X                |                  |                           |                   |                           |
| Lack of understanding about consent process                                      | X                                 |                 |                      |                    |                   |                      |                  |                  |                           |                   |                           |
| <i>-Logistics or Opportunity Costs</i>                                           |                                   |                 |                      |                    |                   |                      |                  |                  |                           |                   |                           |
| Potential costs associated with participating                                    | X                                 |                 |                      | X                  |                   |                      |                  |                  |                           |                   |                           |
| Time spent away from work, travel time, family and other commitments             | X                                 | X               |                      | X                  | X                 | X                    | X                |                  | X                         |                   | X                         |
| Logistical issues related to transportation or location                          | X                                 |                 |                      |                    |                   |                      |                  |                  |                           |                   |                           |
| Lack of being approached                                                         |                                   |                 |                      |                    |                   |                      |                  |                  | X                         |                   |                           |
| <i>-Fear or Inhibitions</i>                                                      |                                   |                 |                      |                    |                   |                      |                  |                  |                           |                   |                           |
| Fear of being reported to immigration                                            | X                                 |                 |                      |                    |                   |                      |                  |                  |                           |                   |                           |
| Stigma of being labeled with a health condition                                  | X                                 |                 |                      |                    | X                 |                      |                  |                  |                           |                   |                           |
| Concerns about adverse effects*                                                  |                                   |                 | X                    |                    | X                 | X                    |                  |                  | X                         |                   |                           |
| Fear of finding out health status                                                |                                   |                 |                      |                    |                   | X                    |                  |                  |                           |                   |                           |
| Mistrust of research                                                             | X                                 |                 |                      |                    |                   | X                    |                  |                  | X                         |                   |                           |
| Previous poor experiences participating in research                              |                                   |                 |                      |                    |                   |                      |                  |                  | X                         |                   |                           |



**Researcher or Research-Related***-Culture or Language-Related*

|                                                                                                                                                                      |   |   |  |   |   |   |
|----------------------------------------------------------------------------------------------------------------------------------------------------------------------|---|---|--|---|---|---|
| Language (lack of study materials and communication in South Asian languages) or cultural issues (e.g., lack of respect for gender segregation, religious practices) | X | X |  | X | X | X |
|----------------------------------------------------------------------------------------------------------------------------------------------------------------------|---|---|--|---|---|---|

*-Logistics*

|                                                               |   |  |  |  |  |  |
|---------------------------------------------------------------|---|--|--|--|--|--|
| Underrepresentation of ethnic population at recruitment sites | X |  |  |  |  |  |
|---------------------------------------------------------------|---|--|--|--|--|--|

|                                                         |   |  |  |  |   |  |
|---------------------------------------------------------|---|--|--|--|---|--|
| Costs associated with elevated recruitment requirements | X |  |  |  | X |  |
|---------------------------------------------------------|---|--|--|--|---|--|

|                                                                         |   |   |  |   |  |  |
|-------------------------------------------------------------------------|---|---|--|---|--|--|
| Limited time to recruit or requirement for repeated recruitment efforts | X | X |  | X |  |  |
|-------------------------------------------------------------------------|---|---|--|---|--|--|

|                                         |  |   |  |  |  |  |
|-----------------------------------------|--|---|--|--|--|--|
| Need for care-coordinator to be present |  | X |  |  |  |  |
|-----------------------------------------|--|---|--|--|--|--|

*-Study Design*

|                                                                                |   |  |  |  |  |  |
|--------------------------------------------------------------------------------|---|--|--|--|--|--|
| Lack of appropriate (i.e., South Asian specific or validated) assessment tools | X |  |  |  |  |  |
|--------------------------------------------------------------------------------|---|--|--|--|--|--|

|                       |  |  |  |   |  |  |
|-----------------------|--|--|--|---|--|--|
| Narrow entry criteria |  |  |  | X |  |  |
|-----------------------|--|--|--|---|--|--|

*-Awareness*

|                                                                         |   |  |  |  |  |   |
|-------------------------------------------------------------------------|---|--|--|--|--|---|
| Stereotypes about difficulties of engaging with South Asian populations | X |  |  |  |  | X |
|-------------------------------------------------------------------------|---|--|--|--|--|---|

|                                     |   |  |  |  |   |  |
|-------------------------------------|---|--|--|--|---|--|
| Researchers attitudes (e.g. apathy) | X |  |  |  | X |  |
|-------------------------------------|---|--|--|--|---|--|

---

\*Related to interventions in clinical trials

1  
2  
3 Treatment or participation related factors included perception of risk of adverse effects  
4 (e.g., treatment-related side effects),[26,28,38,39] fear of finding out health status[39] or  
5  
6 (e.g., treatment-related side effects),[26,28,38,39] fear of finding out health status[39] or  
7  
8 experiencing the stigma of being labeled with a health condition,[34,38] previous poor  
9  
10 experiences,[26] mistrust of research,[26,34,39] inability to participate due to substance  
11  
12 abuse or mental health issues,[34] and fear of being reported to immigration.[34]  
13  
14 Logistical concerns focused on cost of participating,[34,37] time away from work, family  
15  
16 and other commitments,[8,26,31,34,35,37–39] transportation and location,[34]  
17  
18 underrepresentation of South Asians at recruitment sites,[34] and lack of access to  
19  
20 disease-specific services.[34] Language- or culture-specific barriers included religious or  
21  
22 cultural conflicts,[31,34,35] decisional hierarchies within families,[26,34,35] lack of  
23  
24 understanding about the consent process,[34] researcher stereotypes about difficulties  
25  
26 engaging with the South Asian population,[34] inability to provide staff with language and  
27  
28 cultural competency training, inability to translate study materials,[8,31,34,35,38] and  
29  
30 traditional gender roles.[34,35] Some barriers related to general disinterest or lack of  
31  
32 awareness,[8,35,39] including lack of interest due to previous treatment and the  
33  
34 perception that participation would not confer any further benefit,[34,39] misgivings  
35  
36 about the scientific importance of the work,[8,35,39] poor understanding of research  
37  
38 intentions,[8] perception of not belonging to the society standing to benefit from  
39  
40 research,[26,31] simply not being approached to participate,[26] and researcher apathy  
41  
42 towards achieving proper representation of South Asians.[8,34] Finally, some study-  
43  
44 specific issues included a lack of appropriate assessment tools (e.g., translated or  
45  
46 adapted tools) for South Asian populations,[34,35] as well as narrow entry criteria (e.g.,  
47  
48 restrictions on age and waist circumference).[39]  
49  
50  
51  
52

### 53 **Recruitment Strategies**

54  
55  
56  
57  
58  
59  
60

1  
2  
3 Themes that emerged for recruitment strategies included language and culture driven  
4  
5 methods, communication and engagement strategies, logistical changes and  
6  
7 accommodations, policy and study design measures, and compensation and incentives.  
8  
9 The most commonly reported strategy was involvement of the South Asian community  
10  
11 through mobilization of key community figures or community  
12  
13 partnerships.[8,26,34,36,37,39,43] The second most commonly reported strategies were  
14  
15 incentives and reciprocal benefits,[8,34–36,38,40,44] and demonstrated respect and  
16  
17 knowledge of South Asian culture, traditions, and ethics.[34–36,38,40,42,44] Multiple  
18  
19 studies also mentioned the development of trust and personal relationships,[34,35,38–  
20  
21 40,44] the use of visual aids and reduced reliance on verbal exchange,[28,36,41]  
22  
23 providing language support and translated materials,[34,36,39,40] personal versus  
24  
25 written contact,[38,39,41] training for staff in cultural competency,[8,26,34] conducting  
26  
27 recruitment at places with high concentrations of South Asian attendance or  
28  
29 residence,[26,34,36] and improving flexibility of appointment scheduling, location,  
30  
31 childcare and transportation.[34,38,40] Several additional strategies for recruiting South  
32  
33 Asian populations reported by two or fewer studies, as well as those previously  
34  
35 discussed are outlined in Table 4.  
36  
37  
38  
39  
40  
41  
42  
43  
44  
45  
46  
47  
48  
49  
50  
51  
52  
53  
54  
55  
56  
57  
58  
59  
60

1 **Table 4. Recruitment Strategies for South Asian Populations**

|                                                                                                                                                                                     | First Author, Year |                 |                         |                      |                    |                   |                      |                     |                  |                  |                      |                            |                   |                  |
|-------------------------------------------------------------------------------------------------------------------------------------------------------------------------------------|--------------------|-----------------|-------------------------|----------------------|--------------------|-------------------|----------------------|---------------------|------------------|------------------|----------------------|----------------------------|-------------------|------------------|
| Recruitment Strategy                                                                                                                                                                | Waheed, 2016[34]   | Brown, 2014[35] | Garduno-Diaz, 2014 [36] | Mac Neill, 2013 [28] | Douglas, 2011 [37] | Rooney, 2011 [38] | Samsudeen, 2011 [39] | Stirland, 2011 [40] | Sheikh, 2009 [8] | Lloyd, 2008 [41] | Mohammadi, 2008 [42] | Hussain-Gambles, 2004 [26] | Shelton, 2004[44] | Krupp, 2007 [43] |
| <b>Language or Culture-Driven</b>                                                                                                                                                   |                    |                 |                         |                      |                    |                   |                      |                     |                  |                  |                      |                            |                   |                  |
| Translated informed consent and option for verbal consent                                                                                                                           | X                  | X               |                         |                      |                    |                   |                      |                     |                  |                  |                      |                            |                   |                  |
| Demonstrated respect and knowledge of culture and traditions, ethics, training of staff in cultural awareness                                                                       | X                  | X               | X                       |                      |                    | X                 |                      | X                   |                  |                  | X                    |                            | X                 |                  |
| Language knowledge or translators; employing staff with language and cultural similarities to participants; translated materials and interpreters                                   | X                  | X               | X                       |                      |                    |                   | X                    | X                   |                  |                  |                      |                            | X                 |                  |
| Support structure for education and training of staff in minority specific issues                                                                                                   | X                  |                 |                         |                      |                    |                   |                      |                     | X                |                  |                      | X                          |                   |                  |
| Culture specific research tools                                                                                                                                                     | X                  |                 | X                       |                      |                    |                   |                      |                     |                  |                  |                      |                            |                   |                  |
| Demonstration of religious and cultural knowledge and sensitivity                                                                                                                   | X                  | X               |                         |                      |                    |                   |                      |                     |                  |                  |                      |                            |                   |                  |
| Produce validated translated or culture-specific assessment tools                                                                                                                   | X                  |                 |                         |                      |                    |                   |                      |                     |                  |                  |                      |                            |                   |                  |
| Provision of culturally appropriate incentives and hospitality                                                                                                                      | X                  |                 |                         |                      |                    |                   |                      |                     |                  |                  |                      |                            |                   |                  |
| <b>Communication and Engagement</b>                                                                                                                                                 |                    |                 |                         |                      |                    |                   |                      |                     |                  |                  |                      |                            |                   |                  |
| Involvement of community members, sustainable community partnerships                                                                                                                | X                  |                 | X                       |                      | X                  |                   | X                    |                     | X                |                  |                      | X                          |                   | X                |
| Involving family members in recruitment process                                                                                                                                     | X                  | X               |                         |                      |                    |                   |                      |                     |                  |                  |                      |                            | X                 |                  |
| Development of trust and personal relationships                                                                                                                                     | X                  | X               |                         |                      |                    | X                 | X                    | X                   |                  |                  |                      |                            | X                 |                  |
| Constant communication and follow up, effective dissemination                                                                                                                       |                    |                 | X                       |                      |                    |                   |                      | X                   |                  |                  |                      |                            | X                 |                  |
| Recruitment at places of worship and community centers, health practices with high percentage of minorities, ethnically dense areas, through ethnic specific modes of communication | X                  |                 | X                       |                      |                    |                   |                      |                     |                  |                  |                      | X                          | X                 |                  |
| Direct physician recruitment, interaction with senior investigators                                                                                                                 | X                  | X               |                         |                      | X                  |                   |                      |                     |                  |                  |                      |                            |                   |                  |

|                                                                                               |   |   |   |   |   |   |   |   |   |
|-----------------------------------------------------------------------------------------------|---|---|---|---|---|---|---|---|---|
| Engagement of South Asian media                                                               | X |   |   |   |   |   |   |   |   |
| Employing patients and public or seeking input into study design and conduct                  | X |   |   |   |   |   |   |   |   |
| Academic-community partnerships                                                               | X |   |   |   |   |   |   |   |   |
| Engagement with study participants post-study completion                                      |   |   |   |   |   |   |   |   | X |
| <b>Logistics and Accommodations</b>                                                           |   |   |   |   |   |   |   |   |   |
| Allowing sufficient time to review study materials and information during recruitment         |   | X |   |   |   |   |   |   | X |
| Personalized versus written contact                                                           |   |   |   |   | X | X |   | X |   |
| Flexibility (location, timing of appointments, childcare, transportation)                     | X |   |   |   | X |   | X |   |   |
| Funding to support logistic considerations related to involvement of South Asians in research | X | X |   |   |   |   | X |   |   |
| Face-to-face conduct of data collection                                                       |   |   |   |   | X |   |   |   |   |
| Catering to gender-specific needs                                                             | X |   |   |   |   |   |   |   |   |
| Focus groups to identify recruitment barriers                                                 |   |   |   |   |   |   |   |   | X |
| Visual aids and reduced reliance on verbal exchange                                           |   |   | X | X |   |   |   | X |   |
| <b>Policy and Study Design</b>                                                                |   |   |   |   |   |   |   |   |   |
| Assurance of confidentiality                                                                  | X |   |   |   |   |   |   |   |   |
| Widening eligibility criteria                                                                 |   |   |   |   |   |   |   |   | X |
| Government supported mandates to include South Asians in research                             |   |   |   |   |   |   | X |   |   |
| Snowball sampling                                                                             |   |   | X |   |   |   |   | X |   |
| Employment of multiple strategies                                                             |   |   |   |   |   |   |   | X | X |
| <b>Compensation and Incentives</b>                                                            |   |   |   |   |   |   |   |   |   |
| Incentives (financial or otherwise), reciprocal benefits                                      | X | X | X |   | X | X | X |   | X |
| Offering of educational opportunities to attract South Asian health professionals             |   |   |   |   |   |   |   |   | X |
| Providing counseling or education on clinical condition of participants                       | X |   |   |   |   |   |   |   |   |

## DISCUSSION

To our knowledge, this is the first summary of evidence regarding factors that influence the participation of South Asians in health research studies. The studies summarized in this review identified multiple strategies to improve the success of recruitment efforts among South Asian populations. This information may help researchers to develop evidence-based strategies to improve representation of this minority group in health research.

Factors that facilitated South Asian participation in research included wanting to improve one's health and engage in disease prevention, to contribute to scientific knowledge and greater societal advances, and a sense of obligation to health care providers. Interest in health and research may vary according to social class and education.[26] Strategies that aim to capitalize on altruism and awareness[26,31] may systematically exclude individuals of lower socioeconomic status if there is a lack of perceived benefit to self. Benefit to self, including financial incentive, were factors associated with motivation to participate in research in Chinese patients in rural areas of lower socioeconomic status.[45] Strategies such as using assessment tools with less emphasis on literacy, reducing participation costs and inconvenience, and snowball sampling within broad South Asian communities could potentially mitigate this to some extent.[46] Obligation to healthcare providers may be more common in South Asians than other ethnic groups. A literature review on South Asian perspectives on clinical and research ethics reported that medical paternalism persists in South Asian society.[47] Recruitment involving senior physicians or researchers through partnerships between hospitals and academic centers is preferred to recruitment by individuals with perceived lesser hierarchical status by South Asians living in the UK [48]. While this dynamic may be beneficial for increasing numbers where physician recruitment is feasible, potential

1  
2  
3 abuse of this power dynamic may be detrimental. It may be necessary to have systems  
4  
5 in place to limit exploitation of this relationship in the interest of reducing selection and  
6  
7 performance bias. For instance, junior research staff could be involved in participant  
8  
9 engagement until the stage that it is necessary for physicians to participate in the  
10  
11 research process. Alternative methods of improving recruitment may be required where  
12  
13 physician involvement is either not necessary or inappropriate.  
14  
15

16 Many of the barriers to participation in research relate to cultural insensitivity, lack  
17  
18 of awareness of research or contact by researchers, and tangible issues like time and  
19  
20 cost of participating (Table 3). Language was also a frequently cited issue. Language  
21  
22 compatibility is reported to be of great importance to South Asian patients.[49] Jolly *et al.*  
23  
24 [19] observed a significantly higher proportion of South Asian individuals being excluded  
25  
26 from participation in research due to language barriers compared to 'White Europeans'  
27  
28 or those of 'Other' ethnicities. The use of multilingual research assistants, or principal  
29  
30 investigators from the same ethnic background, or with language and cultural  
31  
32 competency training is proposed as a possible strategy to overcome language barriers.  
33  
34 This approach may also allow for larger recruitment pools if these staff are part of or able  
35  
36 to access networks within the South Asian community.[50] The effectiveness of this  
37  
38 strategy was demonstrated in the successful recruitment and long-term retention of  
39  
40 pregnant South Asian women for a study involving sample collection from the mother  
41  
42 and baby in the UK.[51] The retention of study participants is another noted challenge for  
43  
44 the South Asian population,[26,39] not addressed by this scoping review.  
45  
46  
47  
48

49 Other common barriers are related to negative perceptions of researchers toward  
50  
51 South Asian participants and vice-versa. Various stereotypes held by health  
52  
53 professionals conducting research on South Asian populations were highlighted as  
54  
55 recruitment deterrents.[8,31,34] Specific examples include perceptions or  
56  
57  
58  
59  
60

1  
2  
3 generalizations that South Asians are not punctual, that they have language limitations,  
4  
5 and that certain subpopulations (e.g., seniors) would not have an interest in  
6  
7 participating.[8,31] In addition, perceived issues with gender hierarchies (e.g., inability of  
8  
9 women to make independent decisions),[26,34,35] the misconception that South Asians  
10  
11 are less motivated about disease prevention,[23,52] and the association of English  
12  
13 speaking with intelligence and potentially greater trial compatibility have been noted.[31]  
14  
15 On the other hand, South Asians reported that mistrust, mistreatment and disrespectful  
16  
17 behavior, sub-par care for non-English speakers, and previous poor experiences  
18  
19 participating in research would deter willingness to participate.[31] Cross-cultural  
20  
21 education of individuals working in research to dispel incorrect racial and cultural  
22  
23 stereotypes, as well as education of South Asian communities to dispel some  
24  
25 misconceptions about health research should be encouraged.[53]  
26  
27  
28

29 From a logistical perspective, studies focused on South Asians may require  
30  
31 upfront budgeting for enhanced recruitment strategies to address the unique barriers  
32  
33 discussed. In particular, funds for multiple research sites, transportation of patients,  
34  
35 incentives, and childcare may need to be accounted for at the grant funding stages.  
36  
37 Support for minority recruitment may be better in the US where the National Institutes of  
38  
39 Health Revitalization Act of 1993 promotes opportunities for women and minorities to  
40  
41 participate in health research.[54,55] There is mandated support for gender  
42  
43 representation, but not for minority representation in Canada.[56] In the UK and other  
44  
45 European countries the Research Governance Framework encourages researchers to  
46  
47 consider factors including race into research conduct when relevant, but it is not  
48  
49 enforced.[57,58] Government or institutional regulations promoting minority  
50  
51 representation may encourage researchers to confront various barriers, despite the  
52  
53 challenges involved.  
54  
55  
56  
57  
58  
59  
60



1  
2  
3  
4  
5  
6  
7  
8  
9  
10  
11  
12  
13  
14  
15  
16  
17  
18  
19  
20  
21  
22  
23  
24  
25  
26  
27  
28  
29  
30  
31  
32  
33  
34  
35  
36  
37  
38  
39  
40  
41  
42  
43  
44  
45  
46  
47  
48  
49  
50  
51  
52  
53  
54  
55  
56  
57  
58  
59  
60

There were similarities and differences in the findings of this scoping review in contrast to what is reported for other ethnic groups. Congruent with our findings, a systematic review of recruitment barriers and facilitators in African Americans, Latinos, Asian Americans, and Pacific Islanders in the US reported that issues of mistrust, competing demands, unintended outcomes (e.g., adverse effects of intervention, lack of access to healthcare should injury or disease arise), lack of access to research information, stigma, health insurance coverage, and jeopardizing legal status in the US were barriers to participation in research.[25] Facilitators included cultural congruence, benefits to participation, altruism, convenience of participation, and low risks associated with participation. They also found that there were issues specific to ethnic groups. For instance, the legacy of the Tuskegee Syphilis Study may discourage African Americans from participating in research, and Asian Americans often required the endorsement from family members. Another systematic review[59] that assessed barriers and facilitators in indigenous populations in several countries including the US, Canada, Australia, and New Zealand, reported that relationships and partnership, indigenous staff, indigenous knowledge models, targeted recruitment, and adaptation of study material were associated with improved recruitment. Conversely, factors such as distrust of research attributable to the participants, study-centric issues such as trial design (no phone, travel costs), and lack of incorporation of indigenous knowledge systems dissuaded individuals from participating. While some barriers such as logistical issues may be common to multiple ethnic groups, the strategies to address cultural factors may differ depending on ethnicity. This highlights the importance of establishing targeted recruitment strategies specific not only to an individual ethnic group, but also that address heterogeneity within an ethnic group, such as exists in South Asians who as a group are multicultural, multilingual, and multiethnic.[60]

1  
2  
3 A strength of this review is that a range of perspectives and ideas regarding  
4 recruitment of South Asians have been summarized and grouped thematically.  
5  
6 Accordingly, this review represents a comprehensive in-depth overview of this subject  
7 area, and provides a good estimate of the volume and characteristics of the published  
8 literature. Further, this review highlights areas for future investigation such as evaluation  
9 of the effectiveness of the proposed recruitment strategies in settings with large South  
10 Asian populations. There were several limitations to this review and the individual  
11 studies included. Published evidence was only available from the UK, the US, India and  
12 Australia; therefore, transferability to the Canadian context may be limited. Also, the  
13 variable patient populations and sample sizes suggest that results may not be  
14 generalizable to all South Asian populations. In addition, there was a relative paucity of  
15 evidence regarding recruitment strategies for South Asians in these studies, and the  
16 majority of the evidence is in the context of clinical trials. The usefulness of the proposed  
17 recruitment strategies outside of the clinical trial setting is unknown. The applicability of  
18 the strategies presented may vary, as some proposed solutions are relatively  
19 straightforward, while others are more complex and difficult to apply. As discussed by  
20 Waheed et al.,[34] changing recruitment venues may be easy, but provision of  
21 appropriate incentives and catering to specific health and cultural beliefs may be more  
22 difficult to execute. The primary types of studies that have been used to investigate  
23 potential recruitment strategies in South Asian populations include focus groups and  
24 interviews. These studies provide valuable insight into participant and researcher  
25 perspectives, but do not directly address the quantitative impact of barriers or facilitators  
26 or effectiveness of recruitment strategies. Where empirical data exists, it is often limited  
27 to descriptive rates of recruitment and retention based on the results of quantitative  
28 surveys or prospective cohort studies. Documentation of barriers to recruitment in future  
29  
30  
31  
32  
33  
34  
35  
36  
37  
38  
39  
40  
41  
42  
43  
44  
45  
46  
47  
48  
49  
50  
51  
52  
53  
54  
55  
56  
57  
58  
59  
60

1  
2  
3 studies including South Asian participants via qualitative interviews during the  
4  
5 recruitment process would help to address this gap. As well, assessment tools, such as  
6  
7 the Barriers to Research Participation Questionnaire, may assist in determining hurdles  
8  
9 to research participation in specific populations in a structured manner [61]. Since this  
10  
11 was a scoping review aimed at mapping the current literature on this topic, we did not  
12  
13 complete a quality assessment of the data. The search date restrictions that were  
14  
15 imposed may have excluded studies with valuable historical perspectives. However, we  
16  
17 believe this review captures a relevant snapshot of the most up-to-date research on this  
18  
19 topic.  
20  
21

22  
23 The evidence reviewed suggests that recruitment methods aimed at engaging  
24  
25 with the target population may have a positive impact. One such intervention that was  
26  
27 not discussed explicitly by the included studies is community based participatory  
28  
29 research. This research method aims to increase the mutual value of the research  
30  
31 initiative for the researchers and the community.[62] This approach employs strategies  
32  
33 such as involving trusted community members as study staff, which may effectively  
34  
35 mitigate ethical and cultural challenges in research [63]. This approach may have the  
36  
37 potential to mobilize individuals to take ownership of their health and encourage  
38  
39 education and participation within their communities, and to ensure appropriate  
40  
41 dissemination of findings [64,65]. One study in South Asian women concluded that  
42  
43 participatory action research provided a platform for the participants to “create and share  
44  
45 knowledge”. [64] The overall paucity of evidence, particularly in the Canadian context,  
46  
47 suggests that work is still needed to determine context-specific barriers and facilitators to  
48  
49 recruitment, and associated strategies to increase the participation of South Asians in  
50  
51 health research. A mixed-methods synthesis from the Canadian perspective linking  
52  
53 experiences of individuals and groups to the evidence on effectiveness of recruitment  
54  
55  
56  
57  
58  
59  
60

1  
2  
3 strategies may shed some light on potential approaches researchers could employ in  
4  
5 future studies. Given the lack of empirical data, proposed recruitment strategies should  
6  
7 be quantitatively evaluated, ideally using prospective experimental methods, to  
8  
9 determine the relative effectiveness and value. Further, adequate representation of  
10  
11 South Asians in research also relies heavily on the retention of participants, which has  
12  
13 been reported to be variable in South Asians.[66,67] The identification and investigation  
14  
15 of retention strategies that ensure the successful recruitment is not undone should be of  
16  
17 highest priority.  
18  
19

## 20 **Conclusions**

21  
22 Better representation of South Asians in health research may promote  
23  
24 development of tailored treatment, and increased awareness and ownership of health.  
25  
26 This would support the ultimate goals of improving the health of the South Asian  
27  
28 population, reducing healthcare spending and addressing health inequity. The  
29  
30 information presented in this review can be used to assist researchers when preparing to  
31  
32 conduct research, and may help to inform a more in-depth analysis of this issue from a  
33  
34 Canadian perspective. Consideration of these issues during the grant writing and  
35  
36 protocol stages of research may decrease the risk of encountering recruitment problems  
37  
38 at latter stages.  
39  
40  
41  
42  
43  
44  
45  
46  
47  
48  
49  
50  
51  
52  
53  
54  
55  
56  
57  
58  
59  
60

## ACKNOWLEDGEMENTS

YL acknowledges funding from the Canada Research Chair program of the Canadian Institutes of Health Research. PJ is supported by a Senior Scientist Salary Award from the BC Children's Hospital Research Institute.

## COMPETING INTERESTS

We have read and understood BMJ policy on declaration of interests and declare the following interests: TQ is an employee of the Canadian Agency for Drugs and Technologies in Health.

## FUNDING STATEMENT

This research received no specific grant from any funding agency in the public, commercial or not-for-profit sectors.

## AUTHOR CONTRIBUTIONS

TQ, PJ, and YL were all involved in the conception of the review. TQ wrote the review protocol and TQ and LF were involved in conduct of the review. TQ wrote the initial draft. LF, PJ, and YL were involved in reviewing the manuscript and in critical revision of the manuscript. All authors read and approved the final manuscript.

## DATA SHARING STATEMENT

A copy of the unpublished study protocol is available upon request from the corresponding author.

## REFERENCES

- 1 Government of Canada SC. National Household Survey: Immigration and Ethnocultural Diversity. 2014. <http://www5.statcan.gc.ca/olc-cel/olc.action?ObjId=99-010-X&ObjType=2&lang=en&limit=1> (accessed 27 May2015).
- 2 Ethnicity and National Identity in England and Wales - Office for National Statistics. <http://www.ons.gov.uk/peoplepopulationandcommunity/culturalidentity/ethnicity/articles/ethnicityandnationalidentityinenglandandwales/2012-12-11> (accessed 19 Jun2016).
- 3 Statistics Canada. Projections of the Diversity of the Canadian Population. 2013. <http://www12.statcan.gc.ca/census-recensement/2011/ref/92-135/surveys-enquetes/vismin-population-minvis-eng.cfm> (accessed 10 Jul2014).
- 4 Veenstra G, Patterson AC. South Asian-White health inequalities in Canada: intersections with gender and immigrant status. *Ethn Health* 2016;:1–10. doi:10.1080/13557858.2016.1179725
- 5 Gupta M, Singh N, Verma S. South Asians and Cardiovascular Risk What Clinicians Should Know. *Circulation* 2006;113:e924–9. doi:10.1161/CIRCULATIONAHA.105.583815
- 6 Anand SS, Yusuf S, Vuksan V, *et al.* Differences in risk factors, atherosclerosis, and cardiovascular disease between ethnic groups in Canada: the Study of Health Assessment and Risk in Ethnic groups (SHARE). *Lancet* 2000;356:279–84.
- 7 Rana A, Souza RJ de, Kandasamy S, *et al.* Cardiovascular risk among South Asians living in Canada: a systematic review and meta-analysis. *Can Med Assoc Open Access J* 2014;2:E183–91. doi:10.9778/cmajo.20130064
- 8 Sheikh A, Halani L, Bhopal R, *et al.* Facilitating the Recruitment of Minority Ethnic People into Research: Qualitative Case Study of South Asians and Asthma. *PLoS Med* 2009;6:e1000148. doi:10.1371/journal.pmed.1000148
- 9 Razak F, Anand SS, Shannon H, *et al.* Defining obesity cut points in a multiethnic population. *Circulation* 2007;115:2111–8. doi:10.1161/CIRCULATIONAHA.106.635011
- 10 Twells LK, Gregory DM, Reddigan J, *et al.* Current and predicted prevalence of obesity in Canada: a trend analysis. *CMAJ Open* 2014;2:E18–26. doi:10.9778/cmajo.20130016
- 11 Chiu M, Austin PC, Manuel DG, *et al.* Deriving Ethnic-Specific BMI Cutoff Points for Assessing Diabetes Risk. *Diabetes Care* 2011;34:1741–8. doi:10.2337/dc10-2300
- 12 Nanditha A, Ma RCW, Ramachandran A, *et al.* Diabetes in Asia and the Pacific: Implications for the Global Epidemic. *Diabetes Care* 2016;39:472–85. doi:10.2337/dc15-1536

- 1  
2  
3  
4  
5  
6  
7  
8  
9  
10  
11  
12  
13  
14  
15  
16  
17  
18  
19  
20  
21  
22  
23  
24  
25  
26  
27  
28  
29  
30  
31  
32  
33  
34  
35  
36  
37  
38  
39  
40  
41  
42  
43  
44  
45  
46  
47  
48  
49  
50  
51  
52  
53  
54  
55  
56  
57  
58  
59  
60
- 13 Sword W, Watt S, Krueger P. Postpartum health, service needs, and access to care experiences of immigrant and Canadian-born women. *J Obstet Gynecol Neonatal Nurs JOGNN NAACOG* 2006;**35**:717–27. doi:10.1111/j.1552-6909.2006.00092.x
  - 14 Nilaweera I, Doran F, Fisher J. Prevalence, nature and determinants of postpartum mental health problems among women who have migrated from South Asian to high-income countries: a systematic review of the evidence. *J Affect Disord* 2014;**166**:213–26. doi:10.1016/j.jad.2014.05.021
  - 15 Asanin J, Wilson K. “I spent nine years looking for a doctor”: exploring access to health care among immigrants in Mississauga, Ontario, Canada. *Soc Sci Med* 1982 2008;**66**:1271–83. doi:10.1016/j.socscimed.2007.11.043
  - 16 Hussain-Gambles M, Atkin K, Leese B. Why ethnic minority groups are under-represented in clinical trials: a review of the literature. *Health Soc Care Community* 2004;**12**:382–8. doi:10.1111/j.1365-2524.2004.00507.x
  - 17 Hilton BA, Grewal S, Popatia N, *et al*. The desi ways: traditional health practices of South Asian women in Canada. *Health Care Women Int* 2001;**22**:553–67. doi:10.1080/07399330127195
  - 18 Bhandari N, Taneja S, Rongsen T, *et al*. Implementation of the WHO Multicentre Growth Reference Study in India. *Food Nutr Bull* 2004;**25**:S66-71.
  - 19 Jolly K, Lip GY, Taylor RS, *et al*. Recruitment of ethnic minority patients to a cardiac rehabilitation trial: the Birmingham Rehabilitation Uptake Maximisation (BRUM) study [ISRCTN72884263]. *BMC Med Res Methodol* 2005;**5**:18. doi:10.1186/1471-2288-5-18
  - 20 Bajaj S, Jawad F, Islam N, *et al*. South Asian women with diabetes: Psychosocial challenges and management: Consensus statement. *Indian J Endocrinol Metab* 2013;**17**:548–62. doi:10.4103/2230-8210.113720
  - 21 Wiseman N. Designations of Medicines. *Evid Based Complement Alternat Med* 2004;**1**:327–9. doi:10.1093/ecam/neh053
  - 22 Statistics Canada. The South Asian Community in Canada. 2007. <http://www.statcan.gc.ca/pub/89-621-x/89-621-x2007006-eng.htm> (accessed 19 Aug2013).
  - 23 Lucas A, Murray E, Kinra S. Heath beliefs of UK South Asians related to lifestyle diseases: a review of qualitative literature. *J Obes* 2013;**2013**:827674. doi:10.1155/2013/827674
  - 24 Grewal K, Stewart DE, Grace SL. Differences in social support and illness perceptions among South Asian and Caucasian patients with coronary artery disease. *Heart Lung J Crit Care* 2010;**39**:180–7. doi:10.1016/j.hrtlng.2009.06.016
  - 25 George S, Duran N, Norris K. A systematic review of barriers and facilitators to minority research participation among African Americans, Latinos, Asian Americans,



and Pacific Islanders. *Am J Public Health* 2014;**104**:e16-31.  
doi:10.2105/AJPH.2013.301706

- 26 Hussain-Gambles M, Leese B, Atkin K, *et al.* Involving South Asian patients in clinical trials. *Health Technol Assess Winch Engl* 2004;**8**:iii, 1-109.
- 27 Khan M, Kobayashi K, Lee SM, *et al.* (In)Visible Minorities in Canadian Health Data and Research. *Popul Change Lifecourse Strateg Knowl Clust Discuss Pap Ser Un Réseau Strat Connaiss Chang Popul Parcours Vie Doc Trav* 2015;**3**:5.
- 28 Macneill V, Nwokoro C, Griffiths C, *et al.* Recruiting ethnic minority participants to a clinical trial: a qualitative study. *BMJ Open* 2013;**3**. doi:10.1136/bmjopen-2013-002750
- 29 Mason S, Hussain-Gambles M, Leese B, *et al.* Representation of South Asian people in randomised clinical trials: analysis of trials' data. *BMJ* 2003;**326**:1244–5. doi:10.1136/bmj.326.7401.1244
- 30 Khunti K, Bellary S, Karamat MA, *et al.* Representation of people of South Asian origin in cardiovascular outcome trials of glucose-lowering therapies in Type 2 diabetes. *Diabet Med J Br Diabet Assoc* Published Online First: 1 March 2016. doi:10.1111/dme.13103
- 31 Hussain-Gambles M, Atkin K, Leese B. South Asian participation in clinical trials: the views of lay people and health professionals. *Health Policy Amst Neth* 2006;**77**:149–65. doi:10.1016/j.healthpol.2005.07.022
- 32 Arksey H, O'Malley L. Scoping studies: towards a methodological framework. *Int J Soc Res Methodol* 2005;**8**:19–32. doi:10.1080/1364557032000119616
- 33 Levac D, Colquhoun H, O'Brien KK. Scoping studies: advancing the methodology. *Implement Sci* 2010;**5**:69. doi:10.1186/1748-5908-5-69
- 34 Waheed W, Husain N, Allen G, *et al.* Recruitment strategies for British South Asians in 5 depression trials: A mixed method study. *J Affect Disord* 2015;**185**:195–203. doi:10.1016/j.jad.2015.06.046
- 35 Brown GE, Woodham A, Marshall M, *et al.* Recruiting South Asians into a UK Mental Health Randomised Controlled Trial: Experiences of Field Researchers. *J Racial Ethn Health Disparities* 2014;**1**:181–93. doi:10.1007/s40615-014-0024-4
- 36 Garduño-Díaz SD, Husain W, Ashkanani F, *et al.* Meeting challenges related to the dietary assessment of ethnic minority populations. *J Hum Nutr Diet Off J Br Diet Assoc* 2014;**27**:358–66. doi:10.1111/jhn.12153
- 37 Douglas A, Bhopal RS, Bhopal R, *et al.* Recruiting South Asians to a lifestyle intervention trial: experiences and lessons from PODOSA (Prevention of Diabetes & Obesity in South Asians). *Trials* 2011;**12**:220. doi:10.1186/1745-6215-12-220



- 1  
2  
3 38 Rooney LK, Bhopal R, Halani L, *et al*. Promoting recruitment of minority ethnic  
4 groups into research: qualitative study exploring the views of South Asian people  
5 with asthma. *J Public Health Oxf Engl* 2011;**33**:604–15. doi:10.1093/pubmed/fdq100  
6  
7  
8 39 Samsudeen BS, Douglas A, Bhopal RS. Challenges in recruiting South Asians into  
9 prevention trials: health professional and community recruiters' perceptions on the  
10 PODOSA trial. *Public Health* 2011;**125**:201–9. doi:10.1016/j.puhe.2011.01.013  
11  
12 40 Stirland L, Halani L, Raj B, *et al*. Recruitment of South Asians into asthma research:  
13 qualitative study of UK and US researchers. *Prim Care Respir J J Gen Pract Airw*  
14 *Group* 2011;**20**:282–290, 8 p following 290. doi:10.4104/pcrj.2011.00032  
15  
16 41 Lloyd CE, Johnson MR, Mughal S, *et al*. Securing recruitment and obtaining  
17 informed consent in minority ethnic groups in the UK. *BMC Health Serv Res*  
18 2008;**8**:68. doi:10.1186/1472-6963-8-68  
19  
20 42 Mohammadi N, Jones T, Evans D. Participant recruitment from minority religious  
21 groups: the case of the Islamic population in South Australia. *Int Nurs Rev*  
22 2008;**55**:393–8. doi:10.1111/j.1466-7657.2008.00647.x  
23  
24 43 Krupp K, Madhivanan P, Karat C, *et al*. Novel recruitment strategies to increase  
25 participation of women in reproductive health research in India. *Glob Public Health*  
26 2007;**2**:395–403. doi:10.1080/17441690701238031  
27  
28 44 Shelton AJ, Rianon NJ. Recruiting participants from a community of Bangladeshi  
29 immigrants for a study of spousal abuse: an appropriate cultural approach. *Qual*  
30 *Health Res* 2004;**14**:369–80. doi:10.1177/1049732303261957  
31  
32 45 A comparative study of patients' attitudes toward clinical research in the United  
33 States and urban and rural China. - PubMed - NCBI.  
34 <https://www.ncbi.nlm.nih.gov/pubmed/25588611> (accessed 2 Feb2017).  
35  
36 46 Yancey AK, Ortega AN, Kumanyika SK. Effective recruitment and retention of  
37 minority research participants. *Annu Rev Public Health* 2006;**27**:1–28.  
38 doi:10.1146/annurev.publhealth.27.021405.102113  
39  
40 47 Pratt B, Van C, Cong Y, *et al*. Perspectives from South and East Asia on Clinical and  
41 Research Ethics: A Literature Review. *J Empir Res Hum Res Ethics* 2014;**9**:52–67.  
42 doi:10.1525/jer.2014.9.2.52  
43  
44 48 Symonds RP, Lord K, Mitchell AJ, *et al*. Recruitment of ethnic minorities into cancer  
45 clinical trials: experience from the front lines. *Br J Cancer* 2012;**107**:1017–21.  
46 doi:10.1038/bjc.2012.240  
47  
48 49 Ahmad F, Gupta H, Rawlins J, *et al*. Preferences for gender of family physician  
49 among Canadian European-descent and South-Asian immigrant women. *Fam Pract*  
50 2002;**19**:146–53.  
51  
52 50 Lee SK, Sulaiman-Hill CR, Thompson SC. Overcoming language barriers in  
53 community-based research with refugee and migrant populations: options for using  
54  
55  
56  
57  
58  
59  
60

1  
2  
3 bilingual workers. *BMC Int Health Hum Rights* 2014;**14**:11. doi:10.1186/1472-698X-  
4 14-11  
5

- 6  
7 51 Neelotpol S, Hay AWM, Jolly AJ, *et al*. Challenges in collecting clinical samples for  
8 research from pregnant women of South Asian origin: evidence from a UK study.  
9 *BMJ Open* 2016;**6**:e010554. doi:10.1136/bmjopen-2015-010554  
10  
11 52 Patel M, Phillips-Caesar E, Boutin-Foster C. Barriers to Lifestyle Behavioral Change  
12 in Migrant South Asian Populations. *J Immigr Minor Health Cent Minor Public Health*  
13 2012;**14**:774–85. doi:10.1007/s10903-011-9550-x  
14  
15 53 Marshall A, Batten S. Researching Across Cultures: Issues of Ethics and Power.  
16 *Forum Qual Sozialforschung Forum Qual Soc Res* 2004;**5**.[http://www.qualitative-](http://www.qualitative-research.net/index.php/fqs/article/view/572)  
17 [research.net/index.php/fqs/article/view/572](http://www.qualitative-research.net/index.php/fqs/article/view/572) (accessed 13 Feb2015).  
18  
19 54 Inclusion: The Politics of Difference in Medical Research, Epstein.  
20 <http://press.uchicago.edu/ucp/books/book/chicago/l/bo5414954.html> (accessed 20  
21 Jun2016).  
22  
23 55 NIH Guidelines on the Inclusion of Women and Minorities as Subjects in Clinical  
24 Research - Amended, October, 2001.  
25 [https://grants.nih.gov/grants/funding/women\\_min/guidelines\\_amended\\_10\\_2001.htm](https://grants.nih.gov/grants/funding/women_min/guidelines_amended_10_2001.htm)  
26 (accessed 20 Jun2016).  
27  
28 56 Report on governmental health research policies promoting gender or sex differences  
29 sensitivity | Canadian Women’s Health Network. <http://www.cwhn.ca/en/node/25386>  
30 (accessed 20 Jun2016).  
31  
32 57 Research governance framework for health and social care: second edition -  
33 Publications - GOV.UK. [https://www.gov.uk/government/publications/research-](https://www.gov.uk/government/publications/research-governance-framework-for-health-and-social-care-second-edition)  
34 [governance-framework-for-health-and-social-care-second-edition](https://www.gov.uk/government/publications/research-governance-framework-for-health-and-social-care-second-edition) (accessed 31  
35 Jan2017).  
36  
37 58 Redwood S, Gill PS. Under-representation of minority ethnic groups in research —  
38 call for action. *Br J Gen Pract* 2013;**63**:342. doi:10.3399/bjgp13X668456  
39  
40 59 Glover M, Kira A, Johnston V, *et al*. A systematic review of barriers and facilitators to  
41 participation in randomized controlled trials by Indigenous people from New Zealand,  
42 Australia, Canada and the United States. *Glob Health Promot* 2015;**22**:21–31.  
43 doi:10.1177/1757975914528961  
44  
45 60 Kallivayalil RA, Chadda RK. Culture, Ethics and Medicine in South Asia. *Int J Pers*  
46 *Centered Med* 2011;**1**:56–61.  
47  
48 61 Kibler JL, Brisco K. Evaluation of a brief questionnaire for assessing Barriers to  
49 Research Participation. *Ethn Dis* 2006;**16**:547–50.  
50  
51 62 Viswanathan M, Ammerman A, Eng E, *et al*. *Community-Based Participatory*  
52 *Research: Assessing the Evidence: Summary*. Agency for Healthcare Research and  
53  
54  
55  
56  
57  
58  
59  
60

1  
2  
3 Quality (US) 2004. <https://www.ncbi.nlm.nih.gov/books/NBK11852/> (accessed 31  
4 Jan2017).

- 5  
6  
7 63 Minkler M. Community-based research partnerships: Challenges and opportunities. *J*  
8 *Urban Health Bull N Y Acad Med* 2005;**82**:ii3-ii12. doi:10.1093/jurban/jti034
- 9  
10 64 Choudhry U k., Jandu S, Mahal J, *et al.* Health Promotion and Participatory Action  
11 Research with South Asian Women. *J Nurs Scholarsh* 2002;**34**:75–81.  
12 doi:10.1111/j.1547-5069.2002.00075.x
- 13  
14 65 Getrich CM, Sussman AL, Campbell-Voytal K, *et al.* Cultivating a cycle of trust with  
15 diverse communities in practice-based research: a report from PRIME Net. *Ann Fam*  
16 *Med* 2013;**11**:550–8. doi:10.1370/afm.1543
- 17  
18 66 Kandula NR, Dave S, De Chavez PJ, *et al.* Translating a heart disease lifestyle  
19 intervention into the community: the South Asian Heart Lifestyle Intervention  
20 (SAHELI) study; a randomized control trial. *BMC Public Health* 2015;**15**:1064.  
21 doi:10.1186/s12889-015-2401-2
- 22  
23 67 Vlaar EMA, van Valkengoed IGM, Nierkens V, *et al.* Feasibility and effectiveness of  
24 a targeted diabetes prevention program for 18 to 60-year-old South Asian migrants:  
25 design and methods of the DH!AAN study. *BMC Public Health* 2012;**12**:371.  
26 doi:10.1186/1471-2458-12-371  
27  
28  
29  
30  
31  
32  
33  
34  
35  
36  
37  
38  
39  
40  
41  
42  
43  
44  
45  
46  
47  
48  
49  
50  
51  
52  
53  
54  
55  
56  
57  
58  
59  
60

1  
2  
3  
4  
5  
6  
7  
8  
9  
10  
11  
12  
13  
14  
15  
16  
17  
18  
19  
20  
21  
22  
23  
24  
25  
26  
27  
28  
29  
30  
31  
32  
33  
34  
35  
36  
37  
38  
39  
40  
41  
42  
43  
44  
45  
46  
47  
48  
49  
50  
51  
52  
53  
54  
55  
56  
57  
58  
59  
60

1 **FIGURE LEGENDS**

2 Figure 1: Flowchart of Included and Excluded Studies

3

For peer review only

## 4 APPENDIX 1: LITERATURE SEARCH

| Multi-database Strategy |                                |
|-------------------------|--------------------------------|
| #                       | South Asian or South Asia      |
| 1                       | minority groups[MeSH term]     |
| 2                       | minority health[MeSH term]     |
| 3                       | Sri Lankan or Sri Lanka        |
| 4                       | Bangladeshi or Bangladesh      |
| 5                       | Pakistani or Pakistan          |
| 6                       | Nepalese or Nepal              |
| 7                       | Bhutanese or Bhutan            |
| 8                       | Maldivian or Maldives          |
| 9                       | Indian or India                |
| 10                      | or/1-9                         |
| 11                      | patient selection[MeSH term]   |
| 12                      | recruitment                    |
| 13                      | Enrolment or enrollment        |
| 14                      | recruitment strategies         |
| 15                      | or/10-14                       |
| 16                      | 10 and 16                      |
| 17                      | Limit 16 to yr="2004 –Current" |
| 18                      | remove duplicates from 17      |

5

## 6 Search String:

7 ((((((patient selection[MeSH Terms]) OR recruitment) OR enrollment) OR recruitment  
8 strategies)) AND (((((((((((south asian) OR south asia)) OR ((sri lankan) OR sri lanka))  
9 OR ((bangladeshi) OR bangladesh)) OR ((pakistani) OR pakistan)) OR minority  
10 groups[MeSH Terms]) OR minority health[MeSH Terms]) OR ((nepalese) OR nepal)) OR  
11 ((bhutanese) OR bhutan)) OR ((maldivian) OR maldives)) OR ((indian) OR india))) Sort  
12 by: PublicationDate Filters: Publication date from 2004/01/01 to 2016/04/01  
13

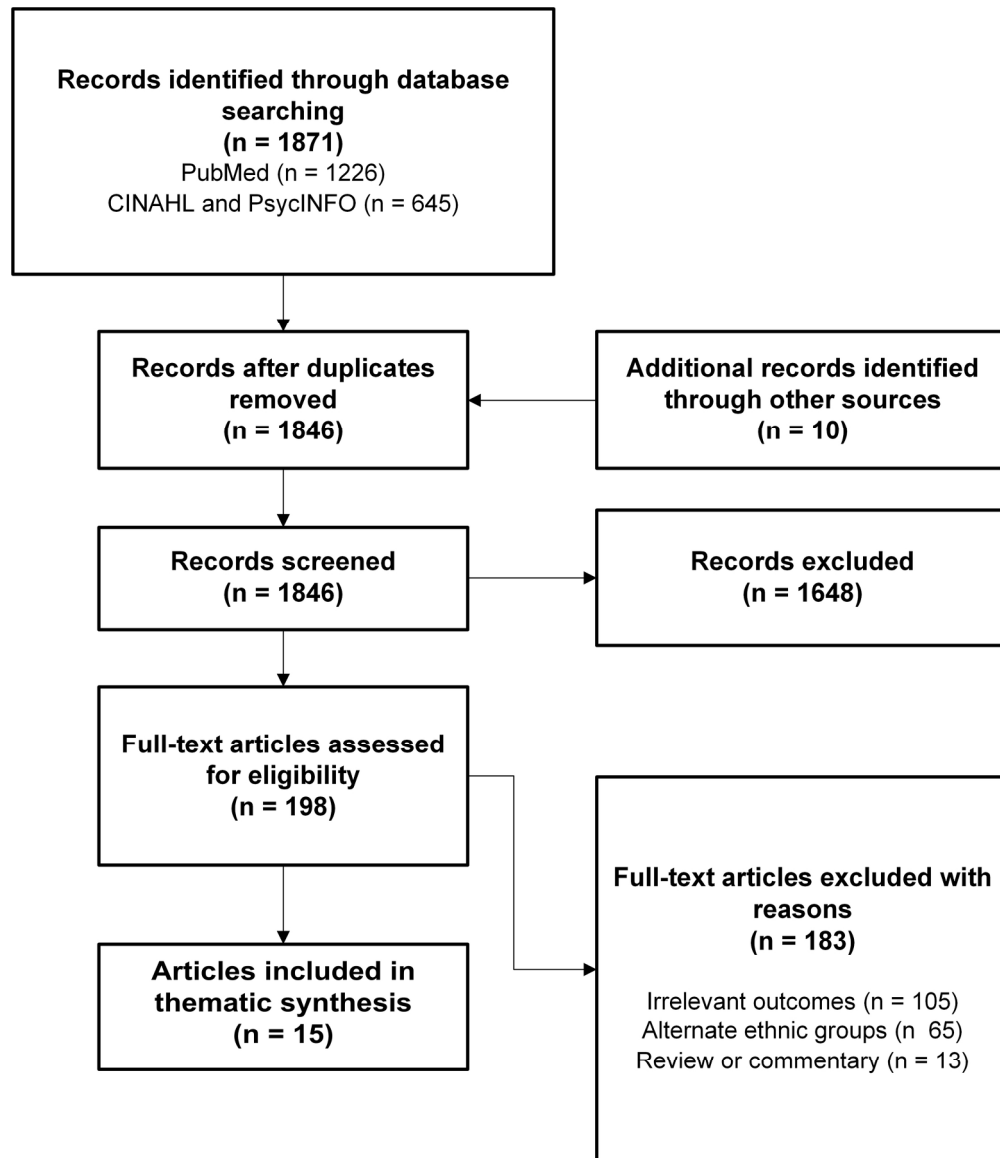

Figure 1: Flowchart of Included and Excluded Studies

Figure 1

188x217mm (300 x 300 DPI)

45  
46  
47  
48  
49  
50  
51  
52  
53  
54  
55  
56  
57  
58  
59  
60

# BMJ Open

## Barriers and Facilitators to Recruitment of South Asians to Health Research: A Scoping Review

|                                 |                                                                                                                                                                                                                                                                                                                                                                                                                                                                                                                                                                                                                                                       |
|---------------------------------|-------------------------------------------------------------------------------------------------------------------------------------------------------------------------------------------------------------------------------------------------------------------------------------------------------------------------------------------------------------------------------------------------------------------------------------------------------------------------------------------------------------------------------------------------------------------------------------------------------------------------------------------------------|
| Journal:                        | <i>BMJ Open</i>                                                                                                                                                                                                                                                                                                                                                                                                                                                                                                                                                                                                                                       |
| Manuscript ID                   | bmjopen-2016-014889.R2                                                                                                                                                                                                                                                                                                                                                                                                                                                                                                                                                                                                                                |
| Article Type:                   | Research                                                                                                                                                                                                                                                                                                                                                                                                                                                                                                                                                                                                                                              |
| Date Submitted by the Author:   | 17-Mar-2017                                                                                                                                                                                                                                                                                                                                                                                                                                                                                                                                                                                                                                           |
| Complete List of Authors:       | Quay, Teo; Canadian Agency for Drugs and Technologies in Health; University of British Columbia, Faculty of Land and Food Systems<br>Frimer, Leora; McGill University Faculty of Medicine, Department of Epidemiology, Biostatistics and Occupational Health; University of British Columbia, School of Population and Public Health, Faculty of Medicine<br>Janssen, Patricia; University of British Columbia, School of Population and Public Health, Faculty of Medicine; BC Children's Hospital Research Institute<br>Lamers, Yvonne; University of British Columbia, Faculty of Land and Food Systems; BC Children's Hospital Research Institute |
| <b>Primary Subject Heading</b>: | Global health                                                                                                                                                                                                                                                                                                                                                                                                                                                                                                                                                                                                                                         |
| Secondary Subject Heading:      | Epidemiology                                                                                                                                                                                                                                                                                                                                                                                                                                                                                                                                                                                                                                          |
| Keywords:                       | recruitment, South Asian, minority health, patient selection, scoping review                                                                                                                                                                                                                                                                                                                                                                                                                                                                                                                                                                          |
|                                 |                                                                                                                                                                                                                                                                                                                                                                                                                                                                                                                                                                                                                                                       |

SCHOLARONE™  
Manuscripts

only

**TITLE PAGE****Title**

Barriers and Facilitators to Recruitment of South Asians to Health Research: A Scoping Review

**Authors**

Teo A W Quay,<sup>1,2</sup> Leora Frimer,<sup>3,4</sup> Patricia A Janssen,<sup>4,5,6</sup> Yvonne Lamers<sup>2,5,6</sup>

**Affiliations**

<sup>1</sup>The Canadian Agency for Drugs and Technologies in Health, Ottawa, ON, Canada

<sup>2</sup>The University of British Columbia, Faculty of Land and Food Systems, Vancouver, BC, Canada

<sup>3</sup>Department of Epidemiology, Biostatistics and Occupational Health, McGill Faculty of Medicine, Montreal, QC, Canada

<sup>4</sup>School of Population and Public Health, Faculty of Medicine, University of British Columbia, Vancouver, BC, Canada

<sup>5</sup>BC Children's Hospital Research Institute, Vancouver, BC, Canada

<sup>6</sup>Women's Health Research Institute, Vancouver, BC, Canada

**Corresponding Author Information**

Yvonne Lamers  
Canada Research Chair in Human Nutrition and Vitamin Metabolism  
Assistant Professor, Food, Nutrition and Health  
Email: [yvonne.lamers@ubc.ca](mailto:yvonne.lamers@ubc.ca)  
Phone: +1 604-827-1776  
Fax: +1 604-822-5143  
FNH 245 - 2205 East Mall  
Vancouver, BC V6T 1Z4  
Canada

**Word Count of Body of Text** 4216

**Number of Tables** 4

**Number of Figures** 1



1  
2  
3 **Appendices: 1**  
4

5 **Number of References 69**  
6

7 **Word Count of Abstract 235**  
8

9 **Keywords and MeSH Headings:** Recruitment, South Asian, Minority Health, Patient  
10  
11 Selection, Scoping Review  
12  
13

14  
15  
16  
17  
18  
19  
20  
21  
22  
23  
24  
25  
26  
27  
28  
29  
30  
31  
32  
33  
34  
35  
36  
37  
38  
39  
40  
41  
42  
43  
44  
45  
46  
47  
48  
49  
50  
51  
52  
53  
54  
55  
56  
57  
58  
59  
60

For peer review only

## ABSTRACT

**Objectives** People of South Asian ethnicity are under-represented in health research studies. The objectives of this scoping review were to examine the barriers and facilitators to recruitment of South Asians to health research studies, and to describe strategies for improving recruitment.

**Design** Scoping review

**Methods** Using the Arksey and O'Malley framework for scoping reviews, we comprehensively searched electronic databases (MEDLINE via PubMed, Cochrane Library, CINAHL, PsycINFO). Studies that identified barriers and facilitators to recruitment, or recruitment strategies for South Asian populations were included. Recruitment barriers, facilitators, and strategies were grouped thematically, and summarized narratively.

**Synthesis** Of 1846 potentially relevant articles, 15 met the inclusion criteria and were included in the thematic synthesis. Multiple facilitators and barriers to enrollment of South Asians in health research studies were identified; these most commonly related to logistical challenges, language and cultural barriers, concerns about adverse consequences of participating, and mistrust of research. Several actionable strategies were discussed, the most common being engagement of South Asian communities, demonstration of cultural competency, provision of incentives and benefits, language sensitivity through the use of translators and translated materials, and the development of trust and personal relationships.

**Conclusion** There is a growing awareness of the barriers and facilitators to recruitment of South Asian participants to health research studies. Knowledge of effective recruitment strategies and implementation during the grant funding stages may reduce the risk of poor recruitment and representation of South Asians.

## ARTICLE SUMMARY

### Strengths and Limitations of this Study

- First scoping review to summarize evidence regarding factors that influence the involvement of South Asian participants in health research
- Comprehensive overview of the volume and characteristics of research published on this topic
- Actionable recruitment strategies and topics for further investigation clearly identified
- Published evidence only available from a few countries and primarily in the clinical trial setting with small sample sizes and variable patient populations so transferability to other contexts may be limited

## INTRODUCTION

South Asians are the largest ethnic minority in Canada and the United Kingdom (UK).[1,2] South Asian populations have demonstrated historical and projected growth in these regions. The total South Asian population in Canada is currently estimated at 1.6 million individuals; one quarter of the visible minority population (i.e., “persons who are non-Caucasian in race or non-white in colour and who do not report being Aboriginal”[3]), and 4.8% of the total Canadian population. It is projected to reach 3.2 to 4.1 million individuals by 2031.[4] Two thirds of South Asians in Canada identify as East Indian with smaller proportions identifying as Pakistani, Sri Lankan, and Punjabi.[1] In the UK, the South Asian ethnic group had some of the largest population increases over the 2001 to 2011 time period (i.e., 0.4 million each in the Pakistani and Indian subgroups).[2]

South Asian populations face specific health challenges. An analysis of Canadian Community Health Survey data (2001 to 2013) concluded that South Asians are more likely to report poor self-rated health than Whites.[5] A higher proportion of South Asians suffer from health conditions including type 2 diabetes, cardiovascular disease, and asthma than people of European ethnicity,[6–10] and the rates of non-communicable disease are expected to rise.[11] South Asians are reported to develop non-communicable diseases at younger ages, despite fewer risk factors (e.g., at lower body mass index), than other ethnic groups.[6,12,13] Mental health is also an emerging area of concern, particularly in immigrant women, in whom a higher risk of post-partum depression has been reported.[14,15]

In the context of healthcare access, low socio-economic status,[16] racial and cultural discrimination,[17,18] geography (e.g., distance from research centre, lack of access to transportation),[19] language barriers,[20] and traditional hierarchies within

1  
2  
3 families[21] have been reported to obstruct optimal health care of South Asians, and in  
4 particular South Asian women.[21] Frequently, South Asians maintain traditional  
5 religious, dietary, and healthcare practices, which may not align with modern western or  
6 allopathic medicine[22] and clinical research approaches.[23,24] Lack of support from  
7 families and communities in seeking healthcare and making healthcare decisions may  
8 discourage South Asians from engaging in risk-reducing health behaviors, including  
9 participation in research.[25] Lack of English language proficiency, unfamiliarity with  
10 local services, and lack of attention to cultural factors by health care providers may pose  
11 a particular challenge to healthcare service access for female South Asians.[15]

12  
13 Adequate ethnic minority representation in health research is important to  
14 support generalizability of research findings and to enable tailored health care for ethnic  
15 minorities.[26,27] However, South Asians are underrepresented in research, resulting in  
16 healthcare practice based on research with limited external validity for the South Asian  
17 context.[28,29] In general, there is a lack of representative population health research  
18 comparing minority groups in Canada to European counterparts.[28] This under-  
19 representation also occurs elsewhere; a UK-based analysis reported that while South  
20 Asians make up 4.5% of the total population, they represented on average only 0.6% of  
21 participants in 6 multicenter randomized controlled trials.[2,30] Another review noted that  
22 trials assessing cardiovascular outcomes in type 2 diabetes patients had  
23 underrepresentation of the South Asian population compared to the population  
24 proportion in the UK, but overrepresentation in the United States.[31] Even studies with  
25 sufficient numbers of South Asians may not be truly representative of the heterogeneous  
26 subgroups that comprise the broader South Asian population. Diets, lifestyles, and  
27 baseline health risk is noted to vary across South Asian subgroups based on differences  
28 in origin, culture, and religion.[32]

1  
2  
3 To better understand the current knowledge and perspectives on this topic, a  
4  
5 scoping review of the evidence regarding barriers and facilitators to recruitment, and  
6  
7 strategies that have been employed or evaluated to improve representation of South  
8  
9 Asians was undertaken. A preliminary search of the literature did not yield sufficient  
10  
11 reports on the Canadian population, thus the review was expanded to include literature  
12  
13 regarding South Asian populations residing in other countries.  
14  
15  
16  
17  
18  
19  
20  
21  
22  
23  
24  
25  
26  
27  
28  
29  
30  
31  
32  
33  
34  
35  
36  
37  
38  
39  
40  
41  
42  
43  
44  
45  
46  
47  
48  
49  
50  
51  
52  
53  
54  
55  
56  
57  
58  
59  
60

## METHODS

A scoping review was undertaken according to the methods outlined by Arksey and O'Malley, and Levac et al.[33,34]. The Arksey and O'Malley approach involves the identification of a research question; a search for relevant studies; selection of studies, charting the data; collating, summarizing and reporting the results; and an optional consultation with stakeholders to inform or validate the findings.[33] We followed this approach with the exception of the consultation stage, due to limited resources, and employed several suggestions made by Levac et al. including a focused research question, the conduct of thematic synthesis, duplicate study selection, and standardized and duplicate extraction.[34] This methodology was justified given that there is limited knowledge on this topic, and there was interest in assessing the depth and breadth of the evidence-base. The aim was to identify barriers and facilitators to recruitment of South Asians to health research studies, and associated strategies to improve participation. The following specific research questions were addressed:

1. What are the barriers and facilitators to recruitment of South Asian individuals to health research studies?
2. What are the evidence-based strategies for recruitment of South Asian individuals to health research studies?

## DATA SOURCES AND SEARCH

The search strategy was developed and executed by one reviewer (TQ). A comprehensive search was conducted using PubMed, the Cochrane Library, CINAHL, and PsycINFO. Medical subject headings and keywords including South Asian, minority groups, patient selection, recruitment, enrolment, recruitment strategies, and specific South Asian ethnicities were searched from January 2004 through October 2014, and

updated in April 2016 (Table 1). Search terms are presented in Table 1. The full search string is presented in Appendix 1.

**Table 1. Scoping Review Search Terms**

| <b>A. Ethnicity-Related Search Terms</b> | <b>B. Strategy-Related Search Terms</b> |
|------------------------------------------|-----------------------------------------|
| South Asian or South Asia                | Patient selection [MeSH term]           |
| Minority groups [MeSH term]              | Recruitment                             |
| Minority health [MeSH term]              | Enrolment                               |
| Sri Lankan or Sri Lanka                  | Recruitment strategies                  |
| Bangladeshi or Bangladesh                | OR any of the above                     |
| Pakistani or Pakistan                    |                                         |
| Nepalese or Nepal                        |                                         |
| Bhutanese or Bhutan                      |                                         |
| Maldivian or Maldives                    |                                         |
| Indian or India                          |                                         |
| OR any of the above                      |                                         |

A AND B

The search dates were restricted in the interest of identifying the most up-to-date evidence on the topic. The search was supplemented by scanning reference lists of included studies, searching clinicaltrials.gov and PROSPERO for ongoing work, and by a focused internet search. Study selection was limited to English language articles or articles that could be translated using Google Translate. Due to the noted limitations of this approach,[35] translations were to be verified by research staff familiar with the language of publication if possible. Study staff were proficient in German, French, Spanish, Mandarin, Cantonese, and several South Asian languages. No restriction was made by publication type. Results from all searches were pooled and de-duplicated prior to screening.

### **Study Selection**

All types of studies including primary randomized and non-randomized quantitative and qualitative studies, and systematic reviews were included. Commentaries and narrative reviews were excluded to avoid identifying themes from single or few perspectives. We included studies involving South Asian individuals (e.g., Sri Lankan, Bangladeshi, Pakistani, Nepalese, Bhutanese, Maldivian, Indian) in any setting, or studies involving



1  
2  
3 multiple ethnic groups where South Asians were a specified subgroup or comprised the  
4 majority of participants. Studies assessing or reporting on barriers and facilitators to  
5 recruitment, and recruitment strategies were included. This includes studies determining,  
6 assessing the impact or effectiveness, or assessing the comparative impact or  
7 effectiveness of barriers, facilitators, and recruitment strategies.  
8  
9

10  
11  
12 One reviewer (TQ) independently screened titles and abstracts against the pre-specified  
13 eligibility criteria. A second reviewer (LF) then screened selected abstracts. Full text  
14 articles were obtained and reviewed by both authors for studies that appeared to meet  
15 the eligibility criteria or where eligibility could not be adequately judged. Disagreement  
16 was resolved by discussion among the two reviewers with a third reviewer consulted if  
17 deemed necessary. Study authors were not contacted for further information.  
18  
19  
20  
21  
22  
23  
24  
25  
26

### 27 **Data Abstraction**

28  
29 Data abstraction was conducted in duplicate by two authors (TQ and LF) using a  
30 structured extraction form piloted on two studies. Disagreement was resolved via  
31 discussion. Data including a) study classifiers (lead author, publication year, country), b)  
32 study characteristics (sample size, study design, subject characteristics), and c)  
33 recruitment barriers, facilitators for participation, and recruitment strategy data was  
34 extracted. Specific descriptions of recruitment barriers, facilitators, and strategies were  
35 recorded.  
36  
37  
38  
39  
40  
41  
42  
43

44 Barriers and facilitators, and recruitment strategies were grouped thematically into key  
45 topics that emerged upon review of the literature. Once established, these themes were  
46 presented and discussed narratively. No formal data synthesis or assessment of  
47 intervention effectiveness was undertaken. Quality appraisal of selected studies was not  
48 conducted as this is not typical of scoping reviews,[33] but general limitations are  
49 discussed. In addition, no formal consultation exercise with stakeholders was conducted.  
50  
51  
52  
53  
54  
55  
56  
57  
58  
59  
60

## RESULTS

### Literature Search

The original search on PubMed and Cochrane (2004 to October 2014) identified 1027 potentially relevant publications. A further 10 studies were identified from grey literature sources. The original search was updated in April 2016 and 199 more potentially relevant articles were identified. Also, the databases CINAHL and PsycINFO were added and these searches (2004 to April 2016) identified 645 more potentially relevant articles. In total, 1846 records were screened after duplicates were removed. All of the publications were available in English so no translation was required. Based on title and abstract 1648 records were excluded and 198 full-texts were screened (Figure 1). Of the 198 studies included for full-text review, 183 were excluded for various reasons (i.e., irrelevant outcomes, study of alternate ethnic groups, review or commentary) and 15 articles met the inclusion criteria (n = 9 from original PubMed search; n = 4 from PubMed search update; n = 2 from CINAHL and PsycINFO) and were included in this report.

### Study Characteristics

The final fifteen articles included in this review focused on South Asian populations and discussed barriers and motivations for participation in research, and potential strategies for recruitment. Primary study characteristics including research area, study populations, sample size, and study design are noted in Table 2.

**Table 2. Study Characteristics.**

| First Author, Year           | Country   | Research Area                | Ethnic Populations                                        | Sample Size                                                                | Study Design                                        |
|------------------------------|-----------|------------------------------|-----------------------------------------------------------|----------------------------------------------------------------------------|-----------------------------------------------------|
| Waheed, 2016[36]             | UK        | Mental Health (Depression)   | South Asians                                              | 5 studies (n = 292)                                                        | Mixed-methods study                                 |
| Brown, 2014[37]              | UK        | Mental Health                | South Asians                                              | n = 10 study participants; n = 9 non-participants; n = 5 researchers       | Qualitative (thematic analysis of research diaries) |
| Garduno-Diaz, 2014 [38]      | UK        | Diet and Nutrition           | South Asians                                              | n = 300 adults, n = 100 children                                           | Literature review and dietary survey                |
| Mac Neill, 2013 [29]         | UK        | Asthma, Clinical Trials      | Multiple ethnic groups (primarily Bangladeshi)            | n = 42 parents (n = 20 Bangladeshi, n = 22 other)                          | Qualitative Interviews                              |
| Douglas, 2011 [39]           | UK        | Diabetes                     | South Asians                                              | n = 1319 potential recruits                                                | Descriptive review of recruitment experiences       |
| Rooney, 2011 [40]            | UK        | Asthma                       | South Asians                                              | n = 58 people with asthma                                                  | Qualitative focus groups                            |
| Samsudeen, 2011 [41]         | UK        | Diabetes - Obesity           | South Asians                                              | n = 22 health professionals, n = 27 community workers                      | Quantitative survey                                 |
| Stirland, 2011 [42]          | US/UK     | Asthma                       | South Asians                                              | n = 36 researchers                                                         | Qualitative interviews                              |
| Sheikh, 2009 [9]             | US/UK     | Asthma                       | South Asians                                              | n = 36 researchers (19 UK, 17 US), n = 10 community members)               | Qualitative interviews                              |
| Lloyd, 2008 [43]             | UK        | Diabetes                     | South Asians (Sylheti and Mipuri peoples from Bangladesh) | n = 31 participants                                                        | Qualitative interviews                              |
| Mohammadi, 2008 [44]         | Australia | Hospitalized Patients        | Islamic South Asians                                      | n = 13 participants enrolled                                               | Interpretive hermeneutic study                      |
| Krupp, 2007 [45]             | India     | Reproductive Health Research | South Asian women                                         | n = 918 enrolled participants                                              | Prospective cohort study                            |
| Hussain-Gambles, 2006 [32]   | UK        | Clinical Trials              | South Asian health professional and lay persons           | 25 health professionals, n = 60 lay persons                                | Qualitative interviews                              |
| Hussain-Gambles*, 2004* [27] | UK        | Clinical Trials              | South Asians                                              | n = 25 health professionals, n = 60 lay persons, n = 15 trial participants | Literature review and qualitative interviews        |
| Shelton, 2004 [46]           | US        | Spousal Abuse                | South Asian women (Bangladeshi)                           | n = 2 researchers; number of participants NR                               | Qualitative survey                                  |

\*Some common data between publications

NR = not reported; UK = United Kingdom; US = United States

1  
2  
3 Study populations ranged in size from n=2 to n=1319. The majority of studies were  
4 conducted in specific clinical populations. This included patients with mental health  
5 issues,[36,37] nutritional concerns,[38] asthma,[9,29,40,42] diabetes,[39,41,43]  
6 obesity,[41] in hospital (i.e., tertiary care),[44] with reproductive health concerns,[45] who  
7 were being recruited for clinical trials,[27,32] and for a study on spousal abuse.[46]  
8  
9 Study designs included prospective cohort studies,[45] thematic analysis[37], qualitative  
10 surveys, interviews and focus groups,[9,27,29,32,40,42,43,46] literature reviews,[32,38]  
11 quantitative surveys,[38,41] retrospective descriptive accounts of recruitment  
12 experiences,[39] hermeneutic studies,[44] and mixed-methods syntheses.[36]  
13  
14

15  
16 Most of the studies employed qualitative or survey-based techniques. As such,  
17 most outcome data is sourced from direct interview statements and personal experience.  
18 Limited empirical evidence on the effectiveness of the various recruitment strategies  
19 discussed was available.[36,38,41,45] Most of the included studies were conducted in  
20 the UK [9,27,29,32,36–43] and dealt with recruitment of clinical populations to clinical  
21 trials.[9,27,29,32,36,39–43]  
22

### 23 **Facilitators**

24  
25 Three studies conducted in the UK [27,29,41] reported on facilitators of participation in  
26 research. Subjects perceived participation in research to be a possible route to improved  
27 treatment and health [27,29]. Participants also reported being motivated by the  
28 importance of disease prevention and potential to contribute to scientific knowledge  
29 [27,41], by the potential to help society through participation [27], and by a sense of  
30 obligation to healthcare providers [27]. It was reported that higher social class and  
31 education, and younger age influence the level of awareness of clinical trials in South  
32 Asians.[27]  
33  
34

### 35 **Barriers**

1  
2  
3 Potential barriers to recruitment of South Asians are outlined in Table 3. Participant-  
4 related factors followed themes of disinterest or lacking a feeling of belonging, conflicts,  
5 education or training-related deficits, logistical issues or opportunity cost, and factors  
6 related to fear or inhibition. Factors attributed to the researcher or research process  
7 followed themes of culture or language related issues, logistical issues, issues related to  
8 study design, and lack of awareness.  
9  
10  
11  
12  
13  
14  
15  
16  
17  
18  
19  
20  
21  
22  
23  
24  
25  
26  
27  
28  
29  
30  
31  
32  
33  
34  
35  
36  
37  
38  
39  
40  
41  
42  
43  
44  
45  
46  
47  
48  
49  
50  
51  
52  
53  
54  
55  
56  
57  
58  
59  
60

**Table 3. Barriers to Recruitment of South Asian Populations**

| Recruitment Barrier                                                              | First Author, Year of Publication |                 |                      |                    |                   |                      |                  |                  |                           |                   |                           |
|----------------------------------------------------------------------------------|-----------------------------------|-----------------|----------------------|--------------------|-------------------|----------------------|------------------|------------------|---------------------------|-------------------|---------------------------|
|                                                                                  | Waheed, 2016 [36]                 | Brown, 2014[37] | Mac Neill, 2013 [29] | Douglas, 2011 [39] | Rooney, 2011 [40] | Samsudeen, 2011 [41] | Sheikh, 2009 [9] | Lloyd, 2008 [43] | Hussain-Gambles, 2004[27] | Shelton, 2004[46] | Hussain-Gambles, 2006[32] |
| <b>Participant-Related</b>                                                       |                                   |                 |                      |                    |                   |                      |                  |                  |                           |                   |                           |
| <i>-Disinterest or Lack of Feeling of Belonging</i>                              |                                   |                 |                      |                    |                   |                      |                  |                  |                           |                   |                           |
| Immigrant perceptions of not belonging to society meant to benefit from research |                                   |                 |                      |                    |                   |                      |                  |                  | X                         |                   | X                         |
| Lack of interest, misgivings about scientific importance or benefit              |                                   | X               |                      |                    |                   | X                    | X                |                  |                           |                   |                           |
| Prior treatment for disease (trial participation perceived as unnecessary)       | X                                 |                 |                      |                    |                   | X                    |                  |                  |                           |                   |                           |
| Utilization of disease-specific services (e.g., mental health services)          | X                                 |                 |                      |                    |                   |                      |                  |                  |                           |                   |                           |
| <i>-Conflicts</i>                                                                |                                   |                 |                      |                    |                   |                      |                  |                  |                           |                   |                           |
| Decisional hierarchies and gender                                                | X                                 | X               |                      |                    |                   |                      |                  |                  | X                         |                   |                           |
| Substance abuse or mental health issues                                          | X                                 |                 |                      |                    |                   |                      |                  |                  |                           |                   |                           |
| Religious or cultural conflicts                                                  | X                                 | X               |                      |                    |                   |                      |                  |                  |                           |                   | X                         |
| <i>-Education or Training-Related</i>                                            |                                   |                 |                      |                    |                   |                      |                  |                  |                           |                   |                           |
| Poor understanding of research intentions among community or religious leaders   |                                   |                 |                      |                    |                   |                      | X                |                  |                           |                   |                           |
| Lack of understanding about consent process                                      | X                                 |                 |                      |                    |                   |                      |                  |                  |                           |                   |                           |
| <i>-Logistics or Opportunity Costs</i>                                           |                                   |                 |                      |                    |                   |                      |                  |                  |                           |                   |                           |
| Potential costs associated with participating                                    | X                                 |                 |                      | X                  |                   |                      |                  |                  |                           |                   |                           |
| Time spent away from work, travel time, family and other commitments             | X                                 | X               |                      | X                  | X                 | X                    | X                |                  | X                         |                   | X                         |
| Logistical issues related to transportation or location                          | X                                 |                 |                      |                    |                   |                      |                  |                  |                           |                   |                           |
| Lack of being approached                                                         |                                   |                 |                      |                    |                   |                      |                  |                  | X                         |                   |                           |
| <i>-Fear or Inhibitions</i>                                                      |                                   |                 |                      |                    |                   |                      |                  |                  |                           |                   |                           |
| Fear of being reported to immigration                                            | X                                 |                 |                      |                    |                   |                      |                  |                  |                           |                   |                           |
| Stigma of being labeled with a health condition                                  | X                                 |                 |                      |                    | X                 |                      |                  |                  |                           |                   |                           |
| Concerns about adverse effects*                                                  |                                   |                 | X                    |                    | X                 | X                    |                  |                  | X                         |                   |                           |
| Fear of finding out health status                                                |                                   |                 |                      |                    |                   | X                    |                  |                  |                           |                   |                           |
| Mistrust of research                                                             | X                                 |                 |                      |                    |                   | X                    |                  |                  | X                         |                   |                           |
| Previous poor experiences participating in research                              |                                   |                 |                      |                    |                   |                      |                  |                  | X                         |                   |                           |

**Researcher or Research-Related***-Culture or Language-Related*

|                                                                                                                                                                      |   |   |  |   |   |   |
|----------------------------------------------------------------------------------------------------------------------------------------------------------------------|---|---|--|---|---|---|
| Language (lack of study materials and communication in South Asian languages) or cultural issues (e.g., lack of respect for gender segregation, religious practices) | X | X |  | X | X | X |
|----------------------------------------------------------------------------------------------------------------------------------------------------------------------|---|---|--|---|---|---|

*-Logistics*

|                                                               |   |  |  |  |  |  |
|---------------------------------------------------------------|---|--|--|--|--|--|
| Underrepresentation of ethnic population at recruitment sites | X |  |  |  |  |  |
|---------------------------------------------------------------|---|--|--|--|--|--|

|                                                         |   |  |  |  |   |  |
|---------------------------------------------------------|---|--|--|--|---|--|
| Costs associated with elevated recruitment requirements | X |  |  |  | X |  |
|---------------------------------------------------------|---|--|--|--|---|--|

|                                                                         |   |   |  |   |  |  |
|-------------------------------------------------------------------------|---|---|--|---|--|--|
| Limited time to recruit or requirement for repeated recruitment efforts | X | X |  | X |  |  |
|-------------------------------------------------------------------------|---|---|--|---|--|--|

|                                         |  |   |  |  |  |  |
|-----------------------------------------|--|---|--|--|--|--|
| Need for care-coordinator to be present |  | X |  |  |  |  |
|-----------------------------------------|--|---|--|--|--|--|

*-Study Design*

|                                                                                |   |  |  |  |  |  |
|--------------------------------------------------------------------------------|---|--|--|--|--|--|
| Lack of appropriate (i.e., South Asian specific or validated) assessment tools | X |  |  |  |  |  |
|--------------------------------------------------------------------------------|---|--|--|--|--|--|

|                       |  |  |  |   |  |  |
|-----------------------|--|--|--|---|--|--|
| Narrow entry criteria |  |  |  | X |  |  |
|-----------------------|--|--|--|---|--|--|

*-Awareness*

|                                                                         |   |  |  |  |  |   |
|-------------------------------------------------------------------------|---|--|--|--|--|---|
| Stereotypes about difficulties of engaging with South Asian populations | X |  |  |  |  | X |
|-------------------------------------------------------------------------|---|--|--|--|--|---|

|                                     |   |  |  |  |   |  |
|-------------------------------------|---|--|--|--|---|--|
| Researchers attitudes (e.g. apathy) | X |  |  |  | X |  |
|-------------------------------------|---|--|--|--|---|--|

---

\*Related to interventions in clinical trials

1  
2  
3 Treatment or participation related factors included perception of risk of adverse effects  
4 (e.g., treatment-related side effects),[27,29,40,41] fear of finding out health status[41] or  
5  
6 (e.g., treatment-related side effects),[27,29,40,41] fear of finding out health status[41] or  
7  
8 experiencing the stigma of being labeled with a health condition,[36,40] previous poor  
9  
10 experiences,[27] mistrust of research,[27,36,41] inability to participate due to substance  
11  
12 abuse or mental health issues,[36] and fear of being reported to immigration.[36]  
13  
14 Logistical concerns focused on cost of participating,[36,39] time away from work, family  
15  
16 and other commitments,[9,27,32,36,37,39–41] transportation and location,[36]  
17  
18 underrepresentation of South Asians at recruitment sites,[36] and lack of access to  
19  
20 disease-specific services.[36] Language- or culture-specific barriers included religious or  
21  
22 cultural conflicts,[32,36,37] decisional hierarchies within families,[27,36,37] lack of  
23  
24 understanding about the consent process,[36] researcher stereotypes about difficulties  
25  
26 engaging with the South Asian population,[36] inability to provide staff with language and  
27  
28 cultural competency training, inability to translate study materials,[9,32,36,37,40] and  
29  
30 traditional gender roles.[36,37] Some barriers related to general disinterest or lack of  
31  
32 awareness,[9,37,41] including lack of interest due to previous treatment and the  
33  
34 perception that participation would not confer any further benefit,[36,41] misgivings  
35  
36 about the scientific importance of the work,[9,37,41] poor understanding of research  
37  
38 intentions,[9] perception of not belonging to the society standing to benefit from  
39  
40 research,[27,32] simply not being approached to participate,[27] and researcher apathy  
41  
42 towards achieving proper representation of South Asians.[9,36] Finally, some study-  
43  
44 specific issues included a lack of appropriate assessment tools (e.g., translated or  
45  
46 adapted tools) for South Asian populations,[36,37] as well as narrow entry criteria (e.g.,  
47  
48 restrictions on age and waist circumference).[41]  
49  
50  
51

### 52 **Recruitment Strategies**

53  
54  
55  
56  
57  
58  
59  
60



1  
2  
3 Themes that emerged for recruitment strategies included language and culture driven  
4  
5 methods, communication and engagement strategies, logistical changes and  
6  
7 accommodations, policy and study design measures, and compensation and incentives.  
8  
9 The most commonly reported strategy was involvement of the South Asian community  
10  
11 through mobilization of key community figures or community  
12  
13 partnerships.[9,27,36,38,39,41,45] The second most commonly reported strategies were  
14  
15 incentives and reciprocal benefits,[9,36–38,40,42,46] and demonstrated respect and  
16  
17 knowledge of South Asian culture, traditions, and ethics.[36–38,40,42,44,46] Multiple  
18  
19 studies also mentioned the development of trust and personal relationships,[36,37,40–  
20  
21 42,46] the use of visual aids and reduced reliance on verbal exchange,[29,38,43]  
22  
23 providing language support and translated materials,[36,38,41,42] personal versus  
24  
25 written contact,[40,41,43] training for staff in cultural competency,[9,27,36] conducting  
26  
27 recruitment at places with high concentrations of South Asian attendance or  
28  
29 residence,[27,36,38] and improving flexibility of appointment scheduling, location,  
30  
31 childcare and transportation.[36,40,42] Several additional strategies for recruiting South  
32  
33 Asian populations reported by two or fewer studies, as well as those previously  
34  
35 discussed are outlined in Table 4.  
36  
37  
38  
39  
40  
41  
42  
43  
44  
45  
46  
47  
48  
49  
50  
51  
52  
53  
54  
55  
56  
57  
58  
59  
60

1 **Table 4. Recruitment Strategies for South Asian Populations**

|                                                                                                                                                                                     | First Author, Year |                 |                         |                      |                    |                   |                      |                     |                  |                  |                      |                            |                   |                  |
|-------------------------------------------------------------------------------------------------------------------------------------------------------------------------------------|--------------------|-----------------|-------------------------|----------------------|--------------------|-------------------|----------------------|---------------------|------------------|------------------|----------------------|----------------------------|-------------------|------------------|
| Recruitment Strategy                                                                                                                                                                | Waheed, 2016[36]   | Brown, 2014[37] | Garduno-Diaz, 2014 [38] | Mac Neill, 2013 [29] | Douglas, 2011 [39] | Rooney, 2011 [40] | Samsudeen, 2011 [41] | Stirland, 2011 [42] | Sheikh, 2009 [9] | Lloyd, 2008 [43] | Mohammadi, 2008 [44] | Hussain-Gambles, 2004 [27] | Shelton, 2004[46] | Krupp, 2007 [45] |
| <b>Language or Culture-Driven</b>                                                                                                                                                   |                    |                 |                         |                      |                    |                   |                      |                     |                  |                  |                      |                            |                   |                  |
| Translated informed consent and option for verbal consent                                                                                                                           | X                  | X               |                         |                      |                    |                   |                      |                     |                  |                  |                      |                            |                   |                  |
| Demonstrated respect and knowledge of culture and traditions, ethics, training of staff in cultural awareness                                                                       | X                  | X               | X                       |                      |                    | X                 |                      | X                   |                  |                  | X                    |                            | X                 |                  |
| Language knowledge or translators; employing staff with language and cultural similarities to participants; translated materials and interpreters                                   | X                  | X               | X                       |                      |                    |                   | X                    | X                   |                  |                  |                      |                            | X                 |                  |
| Support structure for education and training of staff in minority specific issues                                                                                                   | X                  |                 |                         |                      |                    |                   |                      |                     | X                |                  |                      | X                          |                   |                  |
| Culture specific research tools                                                                                                                                                     | X                  |                 | X                       |                      |                    |                   |                      |                     |                  |                  |                      |                            |                   |                  |
| Demonstration of religious and cultural knowledge and sensitivity                                                                                                                   | X                  | X               |                         |                      |                    |                   |                      |                     |                  |                  |                      |                            |                   |                  |
| Produce validated translated or culture-specific assessment tools                                                                                                                   | X                  |                 |                         |                      |                    |                   |                      |                     |                  |                  |                      |                            |                   |                  |
| Provision of culturally appropriate incentives and hospitality                                                                                                                      | X                  |                 |                         |                      |                    |                   |                      |                     |                  |                  |                      |                            |                   |                  |
| <b>Communication and Engagement</b>                                                                                                                                                 |                    |                 |                         |                      |                    |                   |                      |                     |                  |                  |                      |                            |                   |                  |
| Involvement of community members, sustainable community partnerships                                                                                                                | X                  |                 | X                       |                      | X                  |                   | X                    |                     | X                |                  |                      | X                          |                   | X                |
| Involving family members in recruitment process                                                                                                                                     | X                  | X               |                         |                      |                    |                   |                      |                     |                  |                  |                      |                            | X                 |                  |
| Development of trust and personal relationships                                                                                                                                     | X                  | X               |                         |                      |                    | X                 | X                    | X                   |                  |                  |                      |                            | X                 |                  |
| Constant communication and follow up, effective dissemination                                                                                                                       |                    |                 | X                       |                      |                    |                   |                      | X                   |                  |                  |                      |                            | X                 |                  |
| Recruitment at places of worship and community centers, health practices with high percentage of minorities, ethnically dense areas, through ethnic specific modes of communication | X                  |                 | X                       |                      |                    |                   |                      |                     |                  |                  |                      | X                          | X                 |                  |
| Direct physician recruitment, interaction with senior investigators                                                                                                                 | X                  | X               |                         |                      | X                  |                   |                      |                     |                  |                  |                      |                            |                   |                  |

|                                                                                               |   |   |   |   |   |   |   |   |   |
|-----------------------------------------------------------------------------------------------|---|---|---|---|---|---|---|---|---|
| Engagement of South Asian media                                                               | X |   |   |   |   |   |   |   |   |
| Employing patients and public or seeking input into study design and conduct                  | X |   |   |   |   |   |   |   |   |
| Academic-community partnerships                                                               | X |   |   |   |   |   |   |   |   |
| Engagement with study participants post-study completion                                      |   |   |   |   |   |   |   |   | X |
| <b>Logistics and Accommodations</b>                                                           |   |   |   |   |   |   |   |   |   |
| Allowing sufficient time to review study materials and information during recruitment         |   | X |   |   |   |   |   |   | X |
| Personalized versus written contact                                                           |   |   |   |   | X | X |   | X |   |
| Flexibility (location, timing of appointments, childcare, transportation)                     | X |   |   |   | X |   | X |   |   |
| Funding to support logistic considerations related to involvement of South Asians in research | X | X |   |   |   |   | X |   |   |
| Face-to-face conduct of data collection                                                       |   |   |   |   | X |   |   |   |   |
| Catering to gender-specific needs                                                             | X |   |   |   |   |   |   |   |   |
| Focus groups to identify recruitment barriers                                                 |   |   |   |   |   |   |   |   | X |
| Visual aids and reduced reliance on verbal exchange                                           |   |   | X | X |   |   |   | X |   |
| <b>Policy and Study Design</b>                                                                |   |   |   |   |   |   |   |   |   |
| Assurance of confidentiality                                                                  | X |   |   |   |   |   |   |   |   |
| Widening eligibility criteria                                                                 |   |   |   |   |   |   |   |   | X |
| Government supported mandates to include South Asians in research                             |   |   |   |   |   |   | X |   |   |
| Snowball sampling                                                                             |   |   | X |   |   |   |   | X |   |
| Employment of multiple strategies                                                             |   |   |   |   |   |   |   | X | X |
| <b>Compensation and Incentives</b>                                                            |   |   |   |   |   |   |   |   |   |
| Incentives (financial or otherwise), reciprocal benefits                                      | X | X | X |   | X | X | X |   | X |
| Offering of educational opportunities to attract South Asian health professionals             |   |   |   |   |   |   |   |   | X |
| Providing counseling or education on clinical condition of participants                       | X |   |   |   |   |   |   |   |   |

## DISCUSSION

To our knowledge, this is the first summary of evidence regarding factors that influence the participation of South Asians in health research studies. The studies summarized in this review identified multiple strategies to improve the success of recruitment efforts among South Asian populations. This information may help researchers to develop evidence-based strategies to improve representation of this minority group in health research.

Factors that facilitated South Asian participation in research included wanting to improve one's health and engage in disease prevention, to contribute to scientific knowledge and greater societal advances, and a sense of obligation to health care providers. Interest in health and research may vary according to social class and education.[27] Strategies that aim to capitalize on altruism and awareness[27,32] may systematically exclude individuals of lower socioeconomic status, resulting in recruitment bias, if there is a lack of perceived benefit to self. Benefit to self, including financial incentive, were factors associated with motivation to participate in research in Chinese patients in rural areas of lower socioeconomic status.[47] Strategies such as using assessment tools with less emphasis on literacy, reducing participation costs and inconvenience, and snowball sampling within broad South Asian communities could potentially mitigate this to some extent.[48] Obligation to healthcare providers may be more common in South Asians than other ethnic groups. A literature review on South Asian perspectives on clinical and research ethics reported that medical paternalism persists in South Asian society.[49] Recruitment involving senior physicians or researchers through partnerships between hospitals and academic centers is preferred to recruitment by individuals with perceived lesser hierarchical status by South Asians living in the UK [50]. While this dynamic may be beneficial for increasing numbers where

1  
2  
3 physician recruitment is feasible, potential abuse of this power dynamic may be  
4  
5 detrimental. It may be necessary to have systems in place to limit exploitation of this  
6  
7 relationship in the interest of reducing selection and performance bias. For instance,  
8  
9 junior research staff could be involved in participant engagement until the stage that it is  
10  
11 necessary for physicians to participate in the research process. Alternative methods of  
12  
13 improving recruitment may be required where physician involvement is either not  
14  
15 necessary or inappropriate.  
16  
17

18  
19 Many of the barriers to participation in research relate to cultural insensitivity, lack  
20  
21 of awareness of research or contact by researchers, and tangible issues like time and  
22  
23 cost of participating (Table 3). Language was also a frequently cited issue. Language  
24  
25 compatibility is reported to be of great importance to South Asian patients.[51] Jolly *et al.*  
26  
27 [20] observed a significantly higher proportion of South Asian individuals being excluded  
28  
29 from participation in research due to language barriers compared to 'White Europeans'  
30  
31 or those of 'Other' ethnicities. The use of multilingual research assistants, or principal  
32  
33 investigators from the same ethnic background, or with language and cultural  
34  
35 competency training is proposed as a possible strategy to overcome language barriers.  
36  
37 This approach may also allow for larger recruitment pools if these staff are part of or able  
38  
39 to access networks within the South Asian community.[52] The effectiveness of this  
40  
41 strategy was demonstrated in the successful recruitment and long-term retention of  
42  
43 pregnant South Asian women for a study involving sample collection from the mother  
44  
45 and baby in the UK.[53] The retention of study participants is another noted challenge for  
46  
47 the South Asian population,[27,41] not addressed by this scoping review.  
48  
49  
50

51  
52 Other common barriers are related to negative perceptions of researchers toward  
53  
54 South Asian participants and vice-versa. Various stereotypes held by health  
55  
56 professionals conducting research on South Asian populations were highlighted as  
57  
58  
59  
60

1  
2  
3 recruitment deterrents.[9,32,36] Specific examples include perceptions or  
4  
5 generalizations that South Asians are not punctual, that they have language limitations,  
6  
7 and that certain subpopulations (e.g., seniors) would not have an interest in  
8  
9 participating.[9,32] In addition, perceived issues with gender hierarchies (e.g., inability of  
10  
11 women to make independent decisions),[27,36,37] the misconception that South Asians  
12  
13 are less motivated about disease prevention,[24,54] and the association of English  
14  
15 speaking with intelligence and potentially greater trial compatibility have been noted.[32]  
16  
17 On the other hand, South Asians reported that mistrust, mistreatment and disrespectful  
18  
19 behavior, sub-par care for non-English speakers, and previous poor experiences  
20  
21 participating in research would deter willingness to participate.[32] Cross-cultural  
22  
23 education of individuals working in research to dispel incorrect racial and cultural  
24  
25 stereotypes, as well as education of South Asian communities to dispel some  
26  
27 misconceptions about health research should be encouraged.[55]  
28  
29  
30

31  
32 From a logistical perspective, studies focused on South Asians may require  
33  
34 upfront budgeting for enhanced recruitment strategies to address the unique barriers  
35  
36 discussed. In particular, funds for multiple research sites, transportation of patients,  
37  
38 incentives, and childcare may need to be accounted for at the grant funding stages.  
39  
40 Support for minority recruitment may be better in the US where the National Institutes of  
41  
42 Health Revitalization Act of 1993 promotes opportunities for women and minorities to  
43  
44 participate in health research.[56,57] There is mandated support for gender  
45  
46 representation, but not for minority representation in Canada.[58] In the UK and other  
47  
48 European countries the Research Governance Framework encourages researchers to  
49  
50 consider factors including race into research conduct when relevant, but it is not  
51  
52 enforced.[59,60] Government or institutional regulations promoting minority  
53  
54  
55  
56  
57  
58  
59  
60

1  
2  
3 representation may encourage researchers to confront various barriers, despite the  
4  
5 challenges involved.  
6

7  
8 There were similarities and differences in the findings of this scoping review in  
9  
10 contrast to what is reported for other ethnic groups. Congruent with our findings, a  
11  
12 systematic review of recruitment barriers and facilitators in African Americans, Latinos,  
13  
14 Asian Americans, and Pacific Islanders in the US reported that issues of mistrust,  
15  
16 competing demands, unintended outcomes (e.g., adverse effects of intervention, lack of  
17  
18 access to healthcare should injury or disease arise), lack of access to research  
19  
20 information, stigma, health insurance coverage, and jeopardizing legal status in the US  
21  
22 were barriers to participation in research.[26] Facilitators included cultural congruence,  
23  
24 benefits to participation, altruism, convenience of participation, and low risks associated  
25  
26 with participation. They also found that there were issues specific to ethnic groups. For  
27  
28 instance, the legacy of the Tuskegee Syphilis Study – an investigation noted for  
29  
30 unethical abuse against African Americans - may discourage African Americans from  
31  
32 participating in research, and Asian Americans often required the endorsement from  
33  
34 family members. Another systematic review[61] that assessed barriers and facilitators in  
35  
36 indigenous populations in several countries including the US, Canada, Australia, and  
37  
38 New Zealand, reported that relationships and partnership, indigenous staff, indigenous  
39  
40 knowledge models, targeted recruitment, and adaptation of study material were  
41  
42 associated with improved recruitment. Conversely, factors such as distrust of research  
43  
44 attributable to the participants, study-centric issues such as trial design (no phone, travel  
45  
46 costs), and lack of incorporation of indigenous knowledge systems dissuaded individuals  
47  
48 from participating. While some barriers such as logistical issues may be common to  
49  
50 multiple ethnic groups, the strategies to address cultural factors may differ depending on  
51  
52 ethnicity. This highlights the importance of establishing targeted recruitment strategies  
53  
54  
55  
56  
57  
58  
59  
60

1  
2  
3 specific not only to an individual ethnic group, but also that address heterogeneity within  
4  
5 an ethnic group, such as exists in South Asians who as a group are multicultural,  
6  
7 multilingual, and multiethnic.[62]  
8  
9

10 A strength of this review is that a range of perspectives and ideas regarding  
11 recruitment of South Asians have been summarized and grouped thematically.  
12  
13 Accordingly, this review represents a comprehensive in-depth overview of this subject  
14  
15 area, and provides a good estimate of the volume and characteristics of the published  
16  
17 literature. Further, this review highlights areas for future investigation such as evaluation  
18  
19 of the effectiveness of the proposed recruitment strategies in settings with large South  
20  
21 Asian populations. There were several limitations to this review and the individual  
22  
23 studies included. Published evidence was only available from the UK, the US, India and  
24  
25 Australia; therefore, transferability to the Canadian context may be limited. Also, the  
26  
27 variable patient populations and sample sizes suggest that results may not be  
28  
29 generalizable to all South Asian populations. In addition, there was a relative paucity of  
30  
31 evidence regarding recruitment strategies for South Asians in these studies, and the  
32  
33 majority of the evidence is in the context of clinical trials. The usefulness of the proposed  
34  
35 recruitment strategies outside of the clinical trial setting is unknown. The applicability of  
36  
37 the strategies presented may vary, as some proposed solutions are relatively  
38  
39 straightforward, while others are more complex and difficult to apply. As discussed by  
40  
41 Waheed et al.,[36] changing recruitment venues may be easy, but provision of  
42  
43 appropriate incentives and catering to specific health and cultural beliefs may be more  
44  
45 difficult to execute. The primary types of studies that have been used to investigate  
46  
47 potential recruitment strategies in South Asian populations include focus groups and  
48  
49 interviews. These studies provide valuable insight into participant and researcher  
50  
51 perspectives, but do not directly address the quantitative impact of barriers or facilitators  
52  
53  
54  
55  
56  
57  
58  
59  
60



1  
2  
3 or effectiveness of recruitment strategies. Where empirical data exists, it is often limited  
4  
5 to descriptive rates of recruitment and retention based on the results of quantitative  
6  
7 surveys or prospective cohort studies. Documentation of barriers to recruitment in future  
8  
9 studies including South Asian participants via qualitative interviews during the  
10  
11 recruitment process would help to address this gap. As well, assessment tools, such as  
12  
13 the Barriers to Research Participation Questionnaire, may assist in determining hurdles  
14  
15 to research participation in specific populations in a structured manner [63]. Since this  
16  
17 was a scoping review aimed at mapping the current literature on this topic, we did not  
18  
19 complete a quality assessment of the data. The search date restrictions that were  
20  
21 imposed may have excluded studies with valuable historical perspectives. However, we  
22  
23 believe this review captures a relevant snapshot of the most up-to-date research on this  
24  
25 topic.  
26  
27  
28

29 The evidence reviewed suggests that recruitment methods aimed at engaging  
30  
31 with the target population may have a positive impact. One such intervention that was  
32  
33 not discussed explicitly by the included studies is community based participatory  
34  
35 research. This research method aims to increase the mutual value of the research  
36  
37 initiative for the researchers and the community.[64] This approach employs strategies  
38  
39 such as involving trusted community members as study staff, which may effectively  
40  
41 mitigate ethical and cultural challenges in research [65]. This approach may have the  
42  
43 potential to mobilize individuals to take ownership of their health and encourage  
44  
45 education and participation within their communities, and to ensure appropriate  
46  
47 dissemination of findings [66,67]. One study in South Asian women concluded that  
48  
49 participatory action research provided a platform for the participants to “create and share  
50  
51 knowledge”. [66] The overall paucity of evidence, particularly in the Canadian context,  
52  
53 suggests that work is still needed to determine context-specific barriers and facilitators to  
54  
55  
56  
57  
58  
59  
60

1  
2  
3 recruitment, and associated strategies to increase the participation of South Asians in  
4 health research. A mixed-methods synthesis from the Canadian perspective linking  
5 experiences of individuals and groups to the evidence on effectiveness of recruitment  
6 strategies may shed some light on potential approaches researchers could employ in  
7 future studies. Given the lack of empirical data, proposed recruitment strategies should  
8 be quantitatively evaluated, ideally using prospective experimental methods, to  
9 determine the relative effectiveness and value. Further, adequate representation of  
10 South Asians in research also relies heavily on the retention of participants, which has  
11 been reported to be variable in South Asians.[68,69] The identification and investigation  
12 of retention strategies that ensure the successful recruitment is not undone should be of  
13 highest priority.

## 24 25 26 **Conclusions**

27  
28  
29 Better representation of South Asians in health research may promote  
30 development of tailored treatment, and increased awareness and ownership of health.  
31 This would support the ultimate goals of improving the health of the South Asian  
32 population, reducing healthcare spending and addressing health inequity. The  
33 information presented in this review can be used to assist researchers when preparing to  
34 conduct research, and may help to inform a more in-depth analysis of this issue from a  
35 Canadian perspective. Consideration of these issues during the grant writing and  
36 protocol stages of research may decrease the risk of encountering recruitment problems  
37 at latter stages.

## ACKNOWLEDGEMENTS

YL acknowledges funding from the Canada Research Chair program of the Canadian Institutes of Health Research. PJ is supported by a Senior Scientist Salary Award from the BC Children's Hospital Research Institute.

## COMPETING INTERESTS

We have read and understood BMJ policy on declaration of interests and declare the following interests: TQ is an employee of the Canadian Agency for Drugs and Technologies in Health.

## FUNDING STATEMENT

This research received no specific grant from any funding agency in the public, commercial or not-for-profit sectors.

## AUTHOR CONTRIBUTIONS

TQ, PJ, and YL were all involved in the conception of the review. TQ wrote the review protocol and TQ and LF were involved in conduct of the review. TQ wrote the initial draft. LF, PJ, and YL were involved in reviewing the manuscript and in critical revision of the manuscript. All authors read and approved the final manuscript.

## DATA SHARING STATEMENT

A copy of the unpublished study protocol is available upon request from the corresponding author.

## REFERENCES

- 1 Government of Canada SC. National Household Survey: Immigration and Ethnocultural Diversity. 2014. <http://www5.statcan.gc.ca/olc-cel/olc.action?ObjId=99-010-X&ObjType=2&lang=en&limit=1> (accessed 27 May2015).
- 2 Ethnicity and National Identity in England and Wales - Office for National Statistics. <http://www.ons.gov.uk/peoplepopulationandcommunity/culturalidentity/ethnicity/articles/ethnicityandnationalidentityinenglandandwales/2012-12-11> (accessed 19 Jun2016).
- 3 Government of Canada SC. Classification of visible minority. 2009. <http://www.statcan.gc.ca/eng/concepts/definitions/minority01a> (accessed 17 Mar2017).
- 4 Statistics Canada. Projections of the Diversity of the Canadian Population. 2013. <http://www12.statcan.gc.ca/census-recensement/2011/ref/92-135/surveys-enquetes/vismin-population-minvis-eng.cfm> (accessed 10 Jul2014).
- 5 Veenstra G, Patterson AC. South Asian-White health inequalities in Canada: intersections with gender and immigrant status. *Ethn Health* 2016;**11**:1–10. doi:10.1080/13557858.2016.1179725
- 6 Gupta M, Singh N, Verma S. South Asians and Cardiovascular Risk What Clinicians Should Know. *Circulation* 2006;**113**:e924–9. doi:10.1161/CIRCULATIONAHA.105.583815
- 7 Anand SS, Yusuf S, Vuksan V, *et al*. Differences in risk factors, atherosclerosis, and cardiovascular disease between ethnic groups in Canada: the Study of Health Assessment and Risk in Ethnic groups (SHARE). *Lancet* 2000;**356**:279–84.
- 8 Rana A, Souza RJ de, Kandasamy S, *et al*. Cardiovascular risk among South Asians living in Canada: a systematic review and meta-analysis. *Can Med Assoc Open Access J* 2014;**2**:E183–91. doi:10.9778/cmajo.20130064
- 9 Sheikh A, Halani L, Bhopal R, *et al*. Facilitating the Recruitment of Minority Ethnic People into Research: Qualitative Case Study of South Asians and Asthma. *PLoS Med* 2009;**6**:e1000148. doi:10.1371/journal.pmed.1000148
- 10 Razak F, Anand SS, Shannon H, *et al*. Defining obesity cut points in a multiethnic population. *Circulation* 2007;**115**:2111–8. doi:10.1161/CIRCULATIONAHA.106.635011
- 11 Twells LK, Gregory DM, Reddigan J, *et al*. Current and predicted prevalence of obesity in Canada: a trend analysis. *CMAJ Open* 2014;**2**:E18-26. doi:10.9778/cmajo.20130016
- 12 Chiu M, Austin PC, Manuel DG, *et al*. Deriving Ethnic-Specific BMI Cutoff Points for Assessing Diabetes Risk. *Diabetes Care* 2011;**34**:1741–8. doi:10.2337/dc10-2300

- 1  
2  
3 13 Nanditha A, Ma RCW, Ramachandran A, *et al*. Diabetes in Asia and the Pacific:  
4 Implications for the Global Epidemic. *Diabetes Care* 2016;**39**:472–85.  
5 doi:10.2337/dc15-1536  
6
- 7 14 Sword W, Watt S, Krueger P. Postpartum health, service needs, and access to care  
8 experiences of immigrant and Canadian-born women. *J Obstet Gynecol Neonatal*  
9 *Nurs JOGNN NAACOG* 2006;**35**:717–27. doi:10.1111/j.1552-6909.2006.00092.x  
10
- 11 15 Nilaweera I, Doran F, Fisher J. Prevalence, nature and determinants of postpartum  
12 mental health problems among women who have migrated from South Asian to high-  
13 income countries: a systematic review of the evidence. *J Affect Disord*  
14 2014;**166**:213–26. doi:10.1016/j.jad.2014.05.021  
15
- 16 16 Asanin J, Wilson K. “I spent nine years looking for a doctor”: exploring access to  
17 health care among immigrants in Mississauga, Ontario, Canada. *Soc Sci Med* 1982  
18 2008;**66**:1271–83. doi:10.1016/j.socscimed.2007.11.043  
19
- 20 17 Hussain-Gambles M, Atkin K, Leese B. Why ethnic minority groups are under-  
21 represented in clinical trials: a review of the literature. *Health Soc Care Community*  
22 2004;**12**:382–8. doi:10.1111/j.1365-2524.2004.00507.x  
23
- 24 18 Hilton BA, Grewal S, Popatia N, *et al*. The desi ways: traditional health practices of  
25 South Asian women in Canada. *Health Care Women Int* 2001;**22**:553–67.  
26 doi:10.1080/07399330127195  
27
- 28 19 Bhandari N, Taneja S, Rongsen T, *et al*. Implementation of the WHO Multicentre  
29 Growth Reference Study in India. *Food Nutr Bull* 2004;**25**:S66-71.  
30
- 31 20 Jolly K, Lip GY, Taylor RS, *et al*. Recruitment of ethnic minority patients to a cardiac  
32 rehabilitation trial: the Birmingham Rehabilitation Uptake Maximisation (BRUM)  
33 study [ISRCTN72884263]. *BMC Med Res Methodol* 2005;**5**:18. doi:10.1186/1471-  
34 2288-5-18  
35
- 36 21 Bajaj S, Jawad F, Islam N, *et al*. South Asian women with diabetes: Psychosocial  
37 challenges and management: Consensus statement. *Indian J Endocrinol Metab*  
38 2013;**17**:548–62. doi:10.4103/2230-8210.113720  
39
- 40 22 Wiseman N. Designations of Medicines. *Evid Based Complement Alternat Med*  
41 2004;**1**:327–9. doi:10.1093/ecam/neh053  
42
- 43 23 Statistics Canada. The South Asian Community in Canada.  
44 2007.<http://www.statcan.gc.ca/pub/89-621-x/89-621-x2007006-eng.htm> (accessed  
45 19 Aug2013).  
46
- 47 24 Lucas A, Murray E, Kinra S. Heath beliefs of UK South Asians related to lifestyle  
48 diseases: a review of qualitative literature. *J Obes* 2013;**2013**:827674.  
49 doi:10.1155/2013/827674  
50
- 51  
52  
53  
54  
55  
56  
57  
58  
59  
60

- 1  
2  
3  
4 25 Grewal K, Stewart DE, Grace SL. Differences in social support and illness  
5 perceptions among South Asian and Caucasian patients with coronary artery  
6 disease. *Heart Lung J Crit Care* 2010;**39**:180–7. doi:10.1016/j.hrtlng.2009.06.016  
7  
8 26 George S, Duran N, Norris K. A systematic review of barriers and facilitators to  
9 minority research participation among African Americans, Latinos, Asian Americans,  
10 and Pacific Islanders. *Am J Public Health* 2014;**104**:e16-31.  
11 doi:10.2105/AJPH.2013.301706  
12  
13 27 Hussain-Gambles M, Leese B, Atkin K, *et al.* Involving South Asian patients in  
14 clinical trials. *Health Technol Assess Winch Engl* 2004;**8**:iii, 1-109.  
15  
16 28 Khan M, Kobayashi K, Lee SM, *et al.* (In)Visible Minorities in Canadian Health Data  
17 and Research. *Popul Change Lifecourse Strateg Knowl Clust Discuss Pap Ser Un*  
18 *Réseau Strat Connaiss Chang Popul Parcours Vie Doc Trav* 2015;**3**:5.  
19  
20 29 Macneill V, Nwokoro C, Griffiths C, *et al.* Recruiting ethnic minority participants to a  
21 clinical trial: a qualitative study. *BMJ Open* 2013;**3**. doi:10.1136/bmjopen-2013-  
22 002750  
23  
24 30 Mason S, Hussain-Gambles M, Leese B, *et al.* Representation of South Asian  
25 people in randomised clinical trials: analysis of trials' data. *BMJ* 2003;**326**:1244–5.  
26 doi:10.1136/bmj.326.7401.1244  
27  
28 31 Khunti K, Bellary S, Karamat MA, *et al.* Representation of people of South Asian  
29 origin in cardiovascular outcome trials of glucose-lowering therapies in Type 2  
30 diabetes. *Diabet Med J Br Diabet Assoc* Published Online First: 1 March 2016.  
31 doi:10.1111/dme.13103  
32  
33 32 Hussain-Gambles M, Atkin K, Leese B. South Asian participation in clinical trials: the  
34 views of lay people and health professionals. *Health Policy Amst Neth* 2006;**77**:149–  
35 65. doi:10.1016/j.healthpol.2005.07.022  
36  
37 33 Arksey H, O'Malley L. Scoping studies: towards a methodological framework. *Int J*  
38 *Soc Res Methodol* 2005;**8**:19–32. doi:10.1080/1364557032000119616  
39  
40 34 Levac D, Colquhoun H, O'Brien KK. Scoping studies: advancing the methodology.  
41 *Implement Sci* 2010;**5**:69. doi:10.1186/1748-5908-5-69  
42  
43 35 Balk EM, Chung M, Chen ML, *et al.* *Assessing the Accuracy of Google Translate to*  
44 *Allow Data Extraction From Trials Published in Non-English Languages*. Rockville  
45 (MD): : Agency for Healthcare Research and Quality (US) 2013.  
46 http://www.ncbi.nlm.nih.gov/books/NBK121304/ (accessed 17 Mar2017).  
47  
48 36 Waheed W, Husain N, Allen G, *et al.* Recruitment strategies for British South Asians  
49 in 5 depression trials: A mixed method study. *J Affect Disord* 2015;**185**:195–203.  
50 doi:10.1016/j.jad.2015.06.046  
51  
52  
53  
54  
55  
56  
57  
58  
59  
60



- 1  
2  
3 37 Brown GE, Woodham A, Marshall M, *et al.* Recruiting South Asians into a UK Mental  
4 Health Randomised Controlled Trial: Experiences of Field Researchers. *J Racial*  
5 *Ethn Health Disparities* 2014;**1**:181–93. doi:10.1007/s40615-014-0024-4  
6  
7  
8 38 Garduño-Díaz SD, Husain W, Ashkanani F, *et al.* Meeting challenges related to the  
9 dietary assessment of ethnic minority populations. *J Hum Nutr Diet Off J Br Diet*  
10 *Assoc* 2014;**27**:358–66. doi:10.1111/jhn.12153  
11  
12 39 Douglas A, Bhopal RS, Bhopal R, *et al.* Recruiting South Asians to a lifestyle  
13 intervention trial: experiences and lessons from PODOSA (Prevention of Diabetes &  
14 Obesity in South Asians). *Trials* 2011;**12**:220. doi:10.1186/1745-6215-12-220  
15  
16 40 Rooney LK, Bhopal R, Halani L, *et al.* Promoting recruitment of minority ethnic  
17 groups into research: qualitative study exploring the views of South Asian people  
18 with asthma. *J Public Health Oxf Engl* 2011;**33**:604–15. doi:10.1093/pubmed/fdq100  
19  
20 41 Samsudeen BS, Douglas A, Bhopal RS. Challenges in recruiting South Asians into  
21 prevention trials: health professional and community recruiters' perceptions on the  
22 PODOSA trial. *Public Health* 2011;**125**:201–9. doi:10.1016/j.puhe.2011.01.013  
23  
24 42 Stirland L, Halani L, Raj B, *et al.* Recruitment of South Asians into asthma research:  
25 qualitative study of UK and US researchers. *Prim Care Respir J J Gen Pract Airw*  
26 *Group* 2011;**20**:282–290, 8 p following 290. doi:10.4104/pcrj.2011.00032  
27  
28 43 Lloyd CE, Johnson MR, Mughal S, *et al.* Securing recruitment and obtaining  
29 informed consent in minority ethnic groups in the UK. *BMC Health Serv Res*  
30 2008;**8**:68. doi:10.1186/1472-6963-8-68  
31  
32 44 Mohammadi N, Jones T, Evans D. Participant recruitment from minority religious  
33 groups: the case of the Islamic population in South Australia. *Int Nurs Rev*  
34 2008;**55**:393–8. doi:10.1111/j.1466-7657.2008.00647.x  
35  
36 45 Krupp K, Madhivanan P, Karat C, *et al.* Novel recruitment strategies to increase  
37 participation of women in reproductive health research in India. *Glob Public Health*  
38 2007;**2**:395–403. doi:10.1080/17441690701238031  
39  
40 46 Shelton AJ, Rianon NJ. Recruiting participants from a community of Bangladeshi  
41 immigrants for a study of spousal abuse: an appropriate cultural approach. *Qual*  
42 *Health Res* 2004;**14**:369–80. doi:10.1177/1049732303261957  
43  
44 47 A comparative study of patients' attitudes toward clinical research in the United  
45 States and urban and rural China. - PubMed - NCBI.  
46 <https://www.ncbi.nlm.nih.gov/pubmed/25588611> (accessed 2 Feb2017).  
47  
48 48 Yancey AK, Ortega AN, Kumanyika SK. Effective recruitment and retention of  
49 minority research participants. *Annu Rev Public Health* 2006;**27**:1–28.  
50 doi:10.1146/annurev.publhealth.27.021405.102113  
51  
52  
53  
54  
55  
56  
57  
58  
59  
60

- 1  
2  
3 49 Pratt B, Van C, Cong Y, *et al.* Perspectives from South and East Asia on Clinical and  
4 Research Ethics: A Literature Review. *J Empir Res Hum Res Ethics* 2014;**9**:52–67.  
5 doi:10.1525/jer.2014.9.2.52  
6  
7  
8 50 Symonds RP, Lord K, Mitchell AJ, *et al.* Recruitment of ethnic minorities into cancer  
9 clinical trials: experience from the front lines. *Br J Cancer* 2012;**107**:1017–21.  
10 doi:10.1038/bjc.2012.240  
11  
12 51 Ahmad F, Gupta H, Rawlins J, *et al.* Preferences for gender of family physician  
13 among Canadian European-descent and South-Asian immigrant women. *Fam Pract*  
14 2002;**19**:146–53.  
15  
16 52 Lee SK, Sulaiman-Hill CR, Thompson SC. Overcoming language barriers in  
17 community-based research with refugee and migrant populations: options for using  
18 bilingual workers. *BMC Int Health Hum Rights* 2014;**14**:11. doi:10.1186/1472-698X-  
19 14-11  
20  
21 53 Neelotpol S, Hay AWM, Jolly AJ, *et al.* Challenges in collecting clinical samples for  
22 research from pregnant women of South Asian origin: evidence from a UK study.  
23 *BMJ Open* 2016;**6**:e010554. doi:10.1136/bmjopen-2015-010554  
24  
25  
26 54 Patel M, Phillips-Caesar E, Boutin-Foster C. Barriers to Lifestyle Behavioral Change  
27 in Migrant South Asian Populations. *J Immigr Minor Health Cent Minor Public Health*  
28 2012;**14**:774–85. doi:10.1007/s10903-011-9550-x  
29  
30 55 Marshall A, Batten S. Researching Across Cultures: Issues of Ethics and Power.  
31 *Forum Qual Sozialforschung Forum Qual Soc Res* 2004;**5**.[http://www.qualitative-](http://www.qualitative-research.net/index.php/fqs/article/view/572)  
32 [research.net/index.php/fqs/article/view/572](http://www.qualitative-research.net/index.php/fqs/article/view/572) (accessed 13 Feb2015).  
33  
34 56 Inclusion: The Politics of Difference in Medical Research, Epstein.  
35 <http://press.uchicago.edu/ucp/books/book/chicago/l/bo5414954.html> (accessed 20  
36 Jun2016).  
37  
38 57 NIH Guidelines on the Inclusion of Women and Minorities as Subjects in Clinical  
39 Research - Amended, October, 2001.  
40 [https://grants.nih.gov/grants/funding/women\\_min/guidelines\\_amended\\_10\\_2001.htm](https://grants.nih.gov/grants/funding/women_min/guidelines_amended_10_2001.htm)  
41 (accessed 20 Jun2016).  
42  
43 58 Report on governmental health research policies promoting gender or sex differences  
44 sensitivity | Canadian Women’s Health Network. <http://www.cwhn.ca/en/node/25386>  
45 (accessed 20 Jun2016).  
46  
47  
48 59 Research governance framework for health and social care: second edition -  
49 Publications - GOV.UK. [https://www.gov.uk/government/publications/research-](https://www.gov.uk/government/publications/research-governance-framework-for-health-and-social-care-second-edition)  
50 [governance-framework-for-health-and-social-care-second-edition](https://www.gov.uk/government/publications/research-governance-framework-for-health-and-social-care-second-edition) (accessed 31  
51 Jan2017).  
52  
53 60 Redwood S, Gill PS. Under-representation of minority ethnic groups in research —  
54 call for action. *Br J Gen Pract* 2013;**63**:342. doi:10.3399/bjgp13X668456  
55  
56  
57  
58  
59  
60



- 1  
2  
3  
4  
5  
6  
7  
8  
9  
10  
11  
12  
13  
14  
15  
16  
17  
18  
19  
20  
21  
22  
23  
24  
25  
26  
27  
28  
29  
30  
31  
32  
33  
34  
35  
36  
37  
38  
39  
40  
41  
42  
43  
44  
45  
46  
47  
48  
49  
50  
51  
52  
53  
54  
55  
56  
57  
58  
59  
60
- 61 Glover M, Kira A, Johnston V, *et al.* A systematic review of barriers and facilitators to participation in randomized controlled trials by Indigenous people from New Zealand, Australia, Canada and the United States. *Glob Health Promot* 2015;**22**:21–31. doi:10.1177/1757975914528961
- 62 Kallivayalil RA, Chadda RK. Culture, Ethics and Medicine in South Asia. *Int J Pers Centered Med* 2011;**1**:56–61.
- 63 Kibler JL, Brisco K. Evaluation of a brief questionnaire for assessing Barriers to Research Participation. *Ethn Dis* 2006;**16**:547–50.
- 64 Viswanathan M, Ammerman A, Eng E, *et al.* *Community-Based Participatory Research: Assessing the Evidence: Summary*. Agency for Healthcare Research and Quality (US) 2004. <https://www.ncbi.nlm.nih.gov/books/NBK11852/> (accessed 31 Jan2017).
- 65 Minkler M. Community-based research partnerships: Challenges and opportunities. *J Urban Health Bull N Y Acad Med* 2005;**82**:ii3-ii12. doi:10.1093/jurban/jti034
- 66 Choudhry U k., Jandu S, Mahal J, *et al.* Health Promotion and Participatory Action Research with South Asian Women. *J Nurs Scholarsh* 2002;**34**:75–81. doi:10.1111/j.1547-5069.2002.00075.x
- 67 Getrich CM, Sussman AL, Campbell-Voytal K, *et al.* Cultivating a cycle of trust with diverse communities in practice-based research: a report from PRIME Net. *Ann Fam Med* 2013;**11**:550–8. doi:10.1370/afm.1543
- 68 Kandula NR, Dave S, De Chavez PJ, *et al.* Translating a heart disease lifestyle intervention into the community: the South Asian Heart Lifestyle Intervention (SAHELI) study; a randomized control trial. *BMC Public Health* 2015;**15**:1064. doi:10.1186/s12889-015-2401-2
- 69 Vlaar EMA, van Valkengoed IGM, Nierkens V, *et al.* Feasibility and effectiveness of a targeted diabetes prevention program for 18 to 60-year-old South Asian migrants: design and methods of the DH!AAN study. *BMC Public Health* 2012;**12**:371. doi:10.1186/1471-2458-12-371

1  
2  
3  
4  
5  
6  
7  
8  
9  
10  
11  
12  
13  
14  
15  
16  
17  
18  
19  
20  
21  
22  
23  
24  
25  
26  
27  
28  
29  
30  
31  
32  
33  
34  
35  
36  
37  
38  
39  
40  
41  
42  
43  
44  
45  
46  
47  
48  
49  
50  
51  
52  
53  
54  
55  
56  
57  
58  
59  
60

1 **FIGURE LEGENDS**

2 Figure 1: Flowchart of Included and Excluded Studies

3

For peer review only

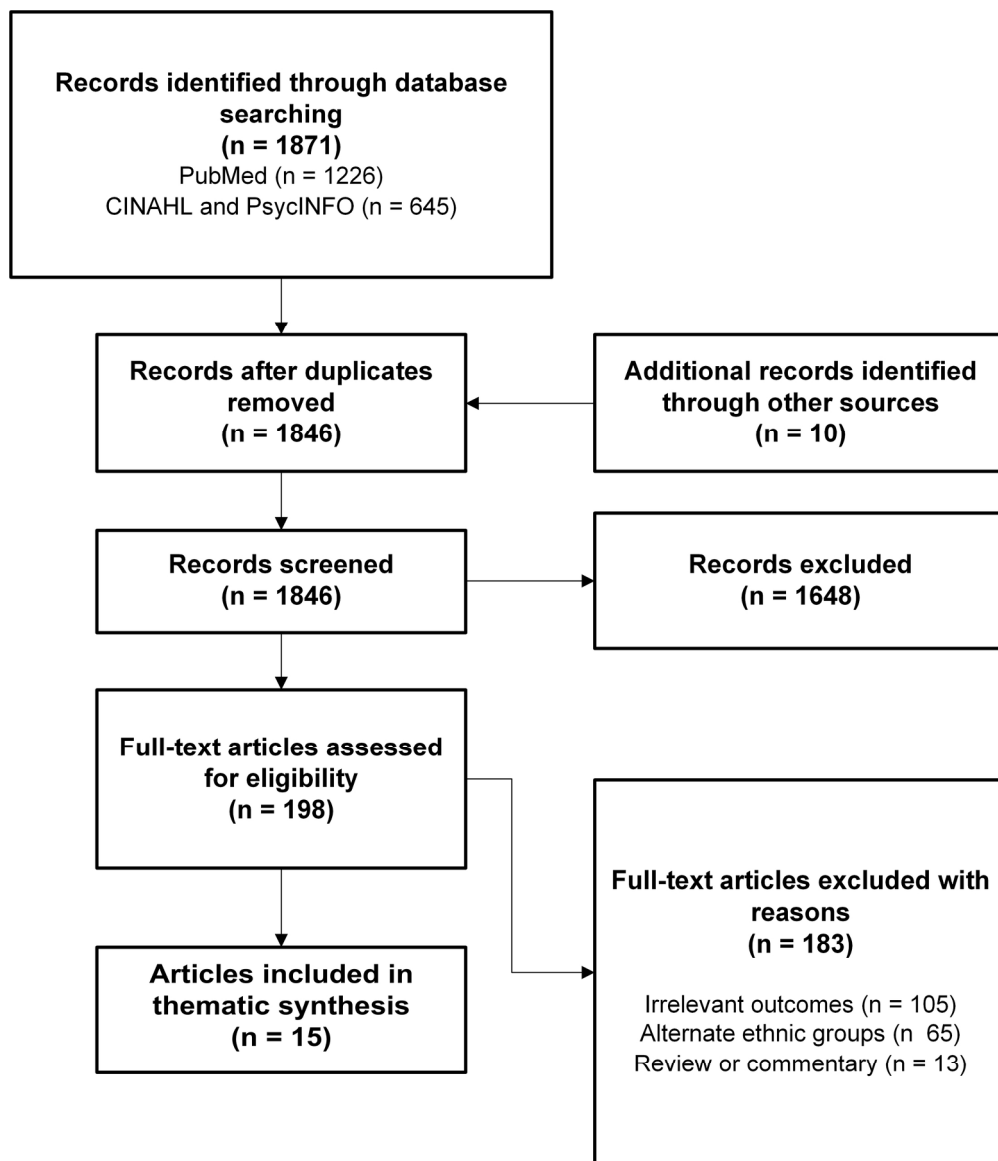

Figure 1: Flowchart of Included and Excluded Studies

Figure 1

188x217mm (300 x 300 DPI)

## 1 APPENDIX 1: LITERATURE SEARCH

| Multi-database Strategy |                                |
|-------------------------|--------------------------------|
| #                       | South Asian or South Asia      |
| 1                       | minority groups[MeSH term]     |
| 2                       | minority health[MeSH term]     |
| 3                       | Sri Lankan or Sri Lanka        |
| 4                       | Bangladeshi or Bangladesh      |
| 5                       | Pakistani or Pakistan          |
| 6                       | Nepalese or Nepal              |
| 7                       | Bhutanese or Bhutan            |
| 8                       | Maldivian or Maldives          |
| 9                       | Indian or India                |
| 10                      | or/1-9                         |
| 11                      | patient selection[MeSH term]   |
| 12                      | recruitment                    |
| 13                      | Enrolment or enrollment        |
| 14                      | recruitment strategies         |
| 15                      | or/10-14                       |
| 16                      | 10 and 16                      |
| 17                      | Limit 16 to yr="2004 –Current" |
| 18                      | remove duplicates from 17      |

2

## 3 Search String:

4 ((((((patient selection[MeSH Terms]) OR recruitment) OR enrollment) OR recruitment  
5 strategies)) AND (((((((((((south asian) OR south asia)) OR ((sri lankan) OR sri lanka))  
6 OR ((bangladeshi) OR bangladesh)) OR ((pakistani) OR pakistan)) OR minority  
7 groups[MeSH Terms]) OR minority health[MeSH Terms]) OR ((nepalese) OR nepal)) OR  
8 ((bhutanese) OR bhutan)) OR ((maldivian) OR maldives)) OR ((indian) OR india))) Sort  
9 by: PublicationDate Filters: Publication date from 2004/01/01 to 2016/04/01

10

11

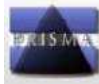

# PRISMA 2009 Checklist

1  
2  
3  
4  
5  
6  
7  
8  
9  
10  
11  
12  
13  
14  
15  
16  
17  
18  
19  
20  
21  
22  
23  
24  
25  
26  
27  
28  
29  
30  
31  
32  
33  
34  
35  
36  
37  
38  
39  
40  
41  
42  
43  
44  
45  
46  
47  
48  
49

| Section/topic                      | #  | Checklist item                                                                                                                                                                                                                                                                                              | Reported on page # |
|------------------------------------|----|-------------------------------------------------------------------------------------------------------------------------------------------------------------------------------------------------------------------------------------------------------------------------------------------------------------|--------------------|
| <b>TITLE</b>                       |    |                                                                                                                                                                                                                                                                                                             |                    |
| Title                              | 1  | Identify the report as a systematic review, meta-analysis, or both.                                                                                                                                                                                                                                         | N/A                |
| <b>ABSTRACT</b>                    |    |                                                                                                                                                                                                                                                                                                             |                    |
| Structured summary                 | 2  | Provide a structured summary including, as applicable: background; objectives; data sources; study eligibility criteria, participants, and interventions; study appraisal and synthesis methods; results; limitations; conclusions and implications of key findings; systematic review registration number. | 3                  |
| <b>INTRODUCTION</b>                |    |                                                                                                                                                                                                                                                                                                             |                    |
| Rationale                          | 3  | Describe the rationale for the review in the context of what is already known.                                                                                                                                                                                                                              | 6                  |
| Objectives                         | 4  | Provide an explicit statement of questions being addressed with reference to participants, interventions, comparisons, outcomes, and study design (PICOS).                                                                                                                                                  | 8                  |
| <b>METHODS</b>                     |    |                                                                                                                                                                                                                                                                                                             |                    |
| Protocol and registration          | 5  | Indicate if a review protocol exists, if and where it can be accessed (e.g., Web address), and, if available, provide registration information including registration number.                                                                                                                               | 28                 |
| Eligibility criteria               | 6  | Specify study characteristics (e.g., PICOS, length of follow-up) and report characteristics (e.g., years considered, language, publication status) used as criteria for eligibility, giving rationale.                                                                                                      | 9                  |
| Information sources                | 7  | Describe all information sources (e.g., databases with dates of coverage, contact with study authors to identify additional studies) in the search and date last searched.                                                                                                                                  | 8-9                |
| Search                             | 8  | Present full electronic search strategy for at least one database, including any limits used, such that it could be repeated.                                                                                                                                                                               | 36                 |
| Study selection                    | 9  | State the process for selecting studies (i.e., screening, eligibility, included in systematic review, and, if applicable, included in the meta-analysis).                                                                                                                                                   | 9-10               |
| Data collection process            | 10 | Describe method of data extraction from reports (e.g., piloted forms, independently, in duplicate) and any processes for obtaining and confirming data from investigators.                                                                                                                                  | 10                 |
| Data items                         | 11 | List and define all variables for which data were sought (e.g., PICOS, funding sources) and any assumptions and simplifications made.                                                                                                                                                                       | 10                 |
| Risk of bias in individual studies | 12 | Describe methods used for assessing risk of bias of individual studies (including specification of whether this was done at the study or outcome level), and how this information is to be used in any data synthesis.                                                                                      | N/A                |
| Summary measures                   | 13 | State the principal summary measures (e.g., risk ratio, difference in means).                                                                                                                                                                                                                               | N/A                |
| Synthesis of results               | 14 | Describe the methods of handling data and combining results of studies, if done, including measures of consistency (e.g., $I^2$ for each meta-analysis).                                                                                                                                                    | N/A                |

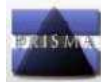

# PRISMA 2009 Checklist

Page 1 of 2

| Section/topic                 | #  | Checklist item                                                                                                                                                                                           | Reported on page # |
|-------------------------------|----|----------------------------------------------------------------------------------------------------------------------------------------------------------------------------------------------------------|--------------------|
| Risk of bias across studies   | 15 | Specify any assessment of risk of bias that may affect the cumulative evidence (e.g., publication bias, selective reporting within studies).                                                             | N/A                |
| Additional analyses           | 16 | Describe methods of additional analyses (e.g., sensitivity or subgroup analyses, meta-regression), if done, indicating which were pre-specified.                                                         | N/A                |
| <b>RESULTS</b>                |    |                                                                                                                                                                                                          |                    |
| Study selection               | 17 | Give numbers of studies screened, assessed for eligibility, and included in the review, with reasons for exclusions at each stage, ideally with a flow diagram.                                          | 11                 |
| Study characteristics         | 18 | For each study, present characteristics for which data were extracted (e.g., study size, PICOS, follow-up period) and provide the citations.                                                             | 12                 |
| Risk of bias within studies   | 19 | Present data on risk of bias of each study and, if available, any outcome level assessment (see item 12).                                                                                                | N/A                |
| Results of individual studies | 20 | For all outcomes considered (benefits or harms), present, for each study: (a) simple summary data for each intervention group (b) effect estimates and confidence intervals, ideally with a forest plot. | N/A                |
| Synthesis of results          | 21 | Present results of each meta-analysis done, including confidence intervals and measures of consistency.                                                                                                  | N/A                |
| Risk of bias across studies   | 22 | Present results of any assessment of risk of bias across studies (see Item 15).                                                                                                                          | N/A                |
| Additional analysis           | 23 | Give results of additional analyses, if done (e.g., sensitivity or subgroup analyses, meta-regression [see Item 16]).                                                                                    | N/A                |
| <b>DISCUSSION</b>             |    |                                                                                                                                                                                                          |                    |
| Summary of evidence           | 24 | Summarize the main findings including the strength of evidence for each main outcome; consider their relevance to key groups (e.g., healthcare providers, users, and policy makers).                     | 21-22              |
| Limitations                   | 25 | Discuss limitations at study and outcome level (e.g., risk of bias), and at review-level (e.g., incomplete retrieval of identified research, reporting bias).                                            | 24                 |
| Conclusions                   | 26 | Provide a general interpretation of the results in the context of other evidence, and implications for future research.                                                                                  | 27                 |
| <b>FUNDING</b>                |    |                                                                                                                                                                                                          |                    |
| Funding                       | 27 | Describe sources of funding for the systematic review and other support (e.g., supply of data); role of funders for the systematic review.                                                               | 28                 |

From: Moher D, Liberati A, Tetzlaff J, Altman DG, The PRISMA Group (2009). Preferred Reporting Items for Systematic Reviews and Meta-Analyses: The PRISMA Statement. PLoS Med 6(7): e1000097. doi:10.1371/journal.pmed1000097

For more information, visit: [www.prisma-statement.org](http://www.prisma-statement.org).

Page 2 of 2

For peer review only - <http://bmjopen.bmj.com/site/about/guidelines.xhtml>
