# Supplementary material for: Barriers and facilitators to recruitment of South Asians to health research: a scoping review
Source: PubMed Central journal article supplement — BMJ Open. 2017 Jun 1;7(5):e014889. doi: 10.1136/bmjopen-2016-014889 (PMC5541387; doi:10.1136/bmjopen-2016-014889), 2017-06-01
Supplement: bmjopen-2016-014889supp001.pdf [file bmjopen-2016-014889supp001.pdf]

1 **APPENDIX 1: LITERATURE SEARCH**

| <b>Multi-database Strategy</b> |                                |
|--------------------------------|--------------------------------|
| #                              | South Asian or South Asia      |
| 1                              | minority groups[MeSH term]     |
| 2                              | minority health[MeSH term]     |
| 3                              | Sri Lankan or Sri Lanka        |
| 4                              | Bangladeshi or Bangladesh      |
| 5                              | Pakistani or Pakistan          |
| 6                              | Nepalese or Nepal              |
| 7                              | Bhutanese or Bhutan            |
| 8                              | Maldivian or Maldives          |
| 9                              | Indian or India                |
| 10                             | or/1-9                         |
| 11                             | patient selection[MeSH term]   |
| 12                             | recruitment                    |
| 13                             | Enrolment or enrollment        |
| 14                             | recruitment strategies         |
| 15                             | or/10-14                       |
| 16                             | 10 and 16                      |
| 17                             | Limit 16 to yr="2004 –Current" |
| 18                             | remove duplicates from 17      |

2

3 **Search String:**

4 ((((((patient selection[MeSH Terms]) OR recruitment) OR enrollment) OR recruitment  
5 strategies)) AND (((((((((((south asian) OR south asia)) OR ((sri lankan) OR sri lanka))  
6 OR ((bangladeshi) OR bangladesh)) OR ((pakistani) OR pakistan)) OR minority  
7 groups[MeSH Terms]) OR minority health[MeSH Terms]) OR ((nepalese) OR nepal)) OR  
8 ((bhutanese) OR bhutan)) OR ((maldivian) OR maldives)) OR ((indian) OR india))) Sort  
9 by: PublicationDate Filters: Publication date from 2004/01/01 to 2016/04/01

10

11
